# Supplementary material for: MOF-based Pd catalysts: a controllable and efficient platform towards cyclization reactions of isonitriles
Source: Royal Society of Chemistry journal article supplement (doi:10.1039/d2gc02147a), 2022-01-01

# Supporting Information

## MOF-Based Pd Catalyst: A Controllable and Efficient Platform towards Cyclization Reactions of Isonitriles

*Yujie Xia,<sup>a</sup> Jiawei Li,<sup>b</sup> Meng Li,<sup>a</sup> Yanwei Ren,<sup>a</sup> Huanfeng Jiang,<sup>a</sup> and Wanqing Wu<sup>\*a</sup>*

<sup>[a]</sup> School of Chemistry and Chemical Engineering, State Key Laboratory of Luminescent Materials and Devices, South China University of Technology, Guangzhou 510640, China.

<sup>[b]</sup> College of Chemistry and Chemical Engineering, Central South University, Changsha 410083, People's Republic of China.

### Table of Contents

|                                                                                        |            |
|----------------------------------------------------------------------------------------|------------|
| <b>1. General Information</b> .....                                                    | <b>S2</b>  |
| <b>2. Material Preparation</b> .....                                                   | <b>S2</b>  |
| <b>3. Characterization of Catalysts</b> .....                                          | <b>S4</b>  |
| <b>4. Characterization Data for All Products</b> .....                                 | <b>S12</b> |
| <b>5. Reference</b> .....                                                              | <b>S22</b> |
| <b>6. Copies of <sup>1</sup>H, <sup>13</sup>C and <sup>19</sup>F NMR Spectra</b> ..... | <b>S23</b> |

## 1. General Information

Powder X-ray diffraction (PXRD) patterns were collected on a Bruker D8 powder diffractometer at 40 kV, 40 mA with Cu K $\alpha$  radiation ( $\lambda = 1.5406 \text{ \AA}$ ), with a scan speed of 17.7 s/step and a step size of 0.01995 $^\circ$  ( $2\theta$ ). The content of Pd was determined by the inductively coupled plasma mass spectrometry (ICP-MS) (Agilent 5100). The X-ray photoelectron spectroscopy (XPS) experiments were conducted using Thermo fisher Scientific with an Al K $\alpha$  radiation source. SEM images and energy dispersive X-ray spectra (EDS) were collected on MERLIN Compact. Transmission electron microscopy (TEM) and EDS mapping were obtained *via* FEI Tecnai G2 F20. Thermogravimetric analyses (TGA) were performed on a TG209F1 instrument under a flow of N $_2$  at a heating rate of 10  $^\circ\text{C}/\text{min}$ .  $^1\text{H}$ ,  $^{13}\text{C}$  and  $^{19}\text{F}$  NMR spectra were recorded at a Bruker Model AM-400 (400 MHz) spectrometer 400 MHz NMR spectrometer using CDCl $_3$  as solvent and TMS as an internal standard. Multiplicity was indicated as follows: s (singlet), d (doublet), t (triplet), q (quartet), m (multiplet). The concentration of Pd $^{2+}$  in the reaction solution was detected by flame atom absorption (Z-2300). IR experiments were conducted with Bruker Tensor 27 on either potassium bromide pellets or liquid films between two potassium bromide pellets. GC-MS data were obtained using Trace 1300.

## 2. Material Preparation

**(1) Synthesis of UiO-67-bpy.** The UiO-67-bpy was synthesized through solvothermal route as reported.<sup>1</sup> Firstly, ZrCl $_4$  (121 mg, 0.52 mmol) and 2,2'-bipyridine-5,5'-dicarboxylic acid (H $_2$ bpydc, 127 mg, 0.52 mmol) were dissolved in 20 mL of *N,N*-dimethylformamide (DMF). Then, the benzoic acid (1.88 g, 15.6 mmol) was added acting as a modulator to the mixture, which was further dispersed uniformly *via* sonication. Next, the mixture was transferred into a 20 mL Teflon-lined stainless-steel autoclave and heated to 120  $^\circ\text{C}$  for 24 h. The white precipitate was obtained by

centrifugation and washed with DMF ( $3 \times 10$  mL), followed by soaking in acetone for 3 d and exchanging with fresh acetone every day. Finally, the UiO-67-bpy was collected and dried under vacuum at 60 °C for one day.

**(2) Synthesis of Pd(II)<sub>0.08</sub>-UiO-67-bpy.** Pd(OAc)<sub>2</sub> (22.5 mg, 0.105 mmol) and UiO-67-bpy (213 mg, 0.1 mmol) were dispersed in 3 mL of acetone respectively. Then the Pd(II) solution was added to MOF solution dropwise. After stirring for 6 h at 30 °C, the brown solid Pd(II)<sub>0.08</sub>-UiO-67-bpy was collected *via* centrifugation and washed with acetone ( $3 \times 10$  mL), followed by soaking in acetone for 3 d. The solution was exchanged with fresh acetone (10 mL) every 24 h and finally dried under vacuum at 80 °C for 12 h.

**(3) Synthesis of Pd(II)<sub>0.09</sub>-UiO-67-bpy.** Similar conditions were involved except Pd(OAc)<sub>2</sub> (0.2 mmol, 45 mg) was used.

**(4) Synthesis of Pd(II)<sub>0.15</sub>-UiO-67-bpy.** Similar conditions were involved except Pd(OAc)<sub>2</sub> (0.3 mmol, 67.5 mg) was used.

**(5) Synthesis of Pd(II)<sub>0.25</sub>-UiO-67-bpy.** Similar conditions were involved except Pd(OAc)<sub>2</sub> (0.4 mmol, 90 mg) was used.

### 3. Characterization of Catalysts

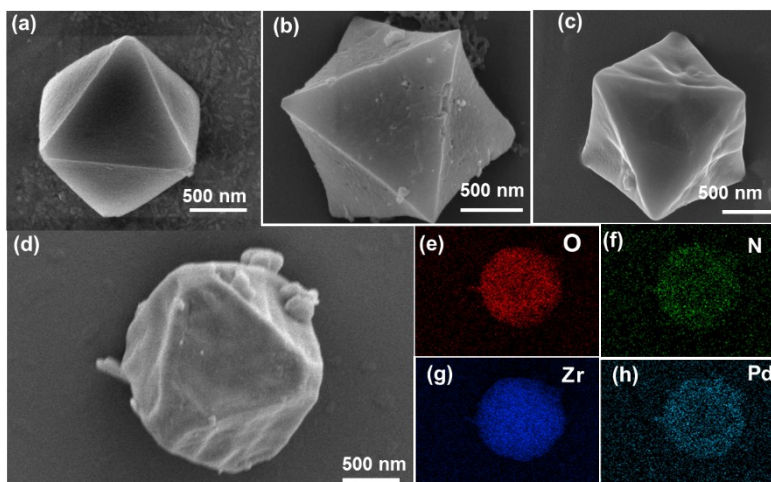

**Figure S1.** SEM images and EDS mapping of catalysts. (a) UiO-67-bpy, (b) Pd(II)<sub>0.08</sub>-UiO-67-bpy, (c) Pd(II)<sub>0.15</sub>-UiO-67-bpy, (d) Pd(II)<sub>0.25</sub>-UiO-67-bpy, (e) Pd(II)<sub>0.09</sub>-UiO-67-bpy and corresponding element distribution of (f) O, (g) N, (h) Zr and (i) Pd.

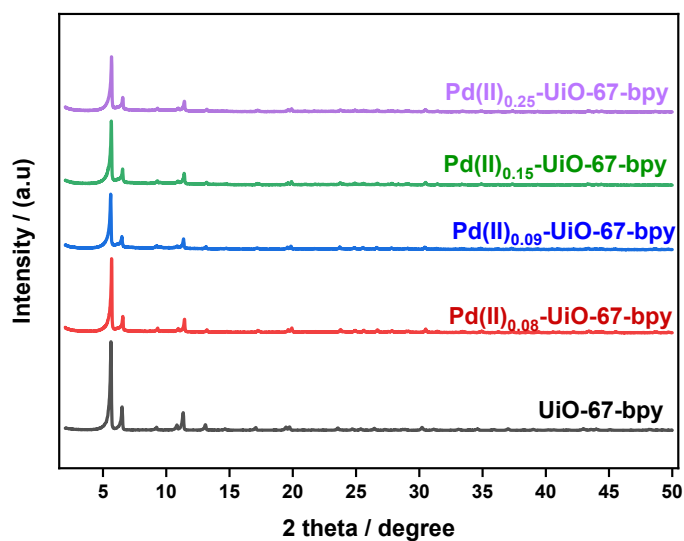

**Figure S2.** PXRD of UiO-67-bpy and Pd(II)<sub>x</sub>-UiO-67-bpy.

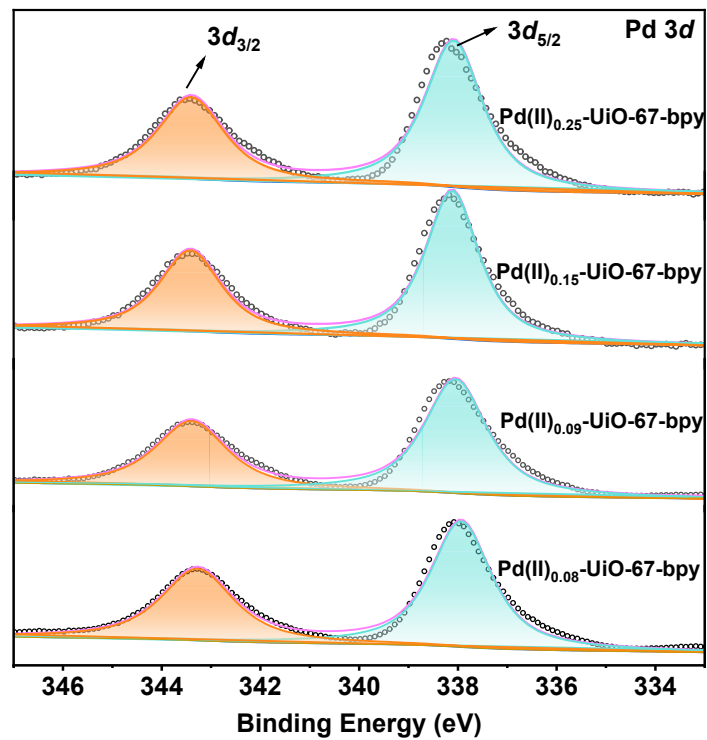

Figure S3. XPS spectra of Pd 3d for Pd(II)<sub>x</sub>-UiO-67-bpy.

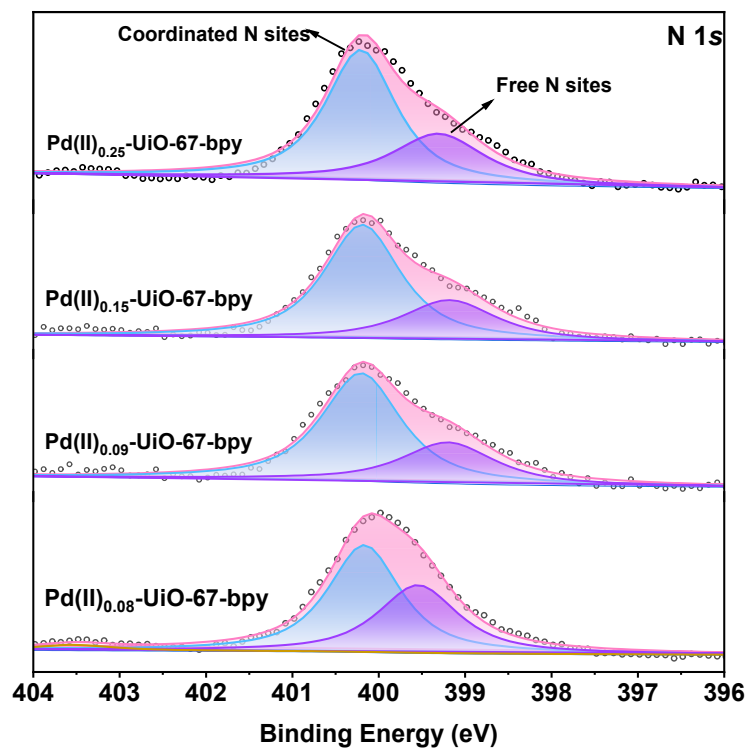

Figure S4. XPS spectra of N 1s for Pd(II)<sub>x</sub>-UiO-67-bpy.

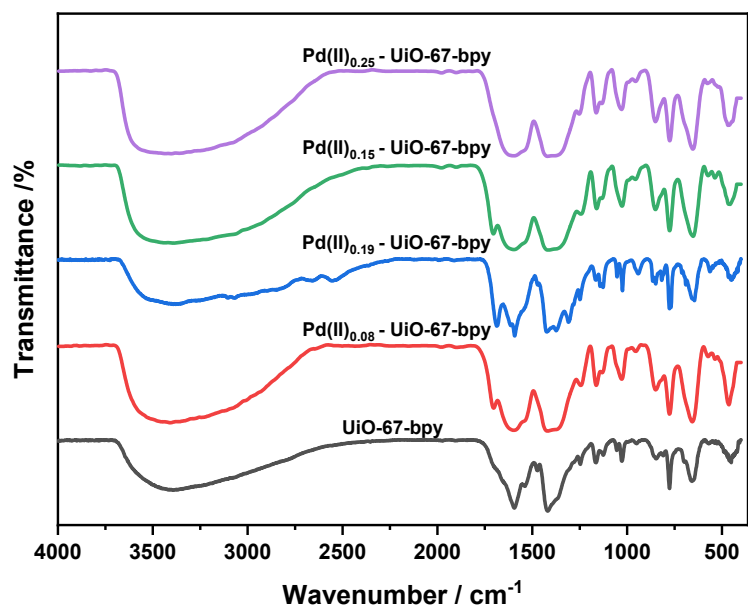

**Figure S5.** FI-IR images of catalysts. FI-IR images of Pd(II)<sub>0.08</sub>-UiO-67-bpy, Pd(II)<sub>0.09</sub>-UiO-67-bpy, Pd(II)<sub>0.15</sub>-UiO-67-bpy and Pd(II)<sub>0.25</sub>-UiO-67-bpy.

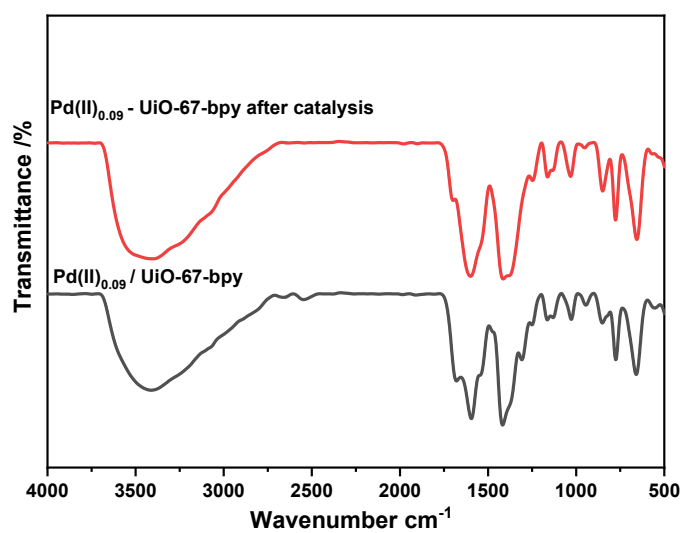

**Figure S6.** FI-IR images of Pd(II)<sub>0.09</sub>-UiO-67-bpy before and after catalysis.

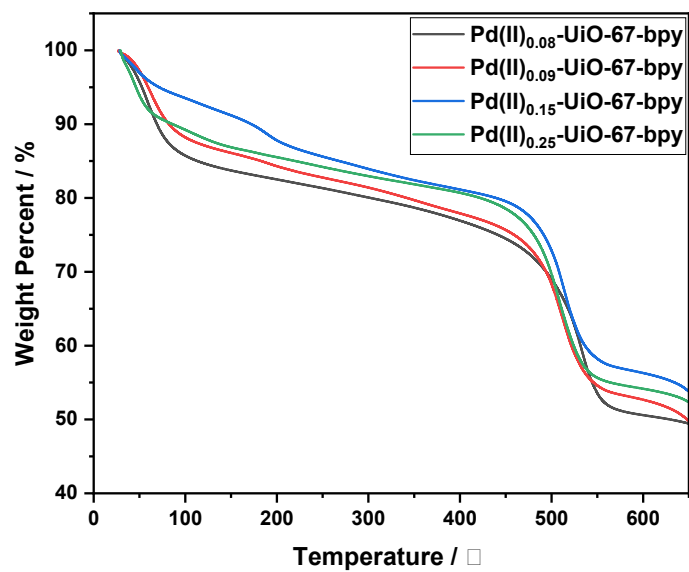

**Figure S7.** TGA images of catalysts. TGA images of Pd(II)<sub>0.08</sub>-UiO-67-bpy, (II)<sub>0.09</sub>-UiO-67-bpy, Pd(II)<sub>0.15</sub>-UiO-67-bpy and Pd(II)<sub>0.25</sub>-UiO-67-bpy.

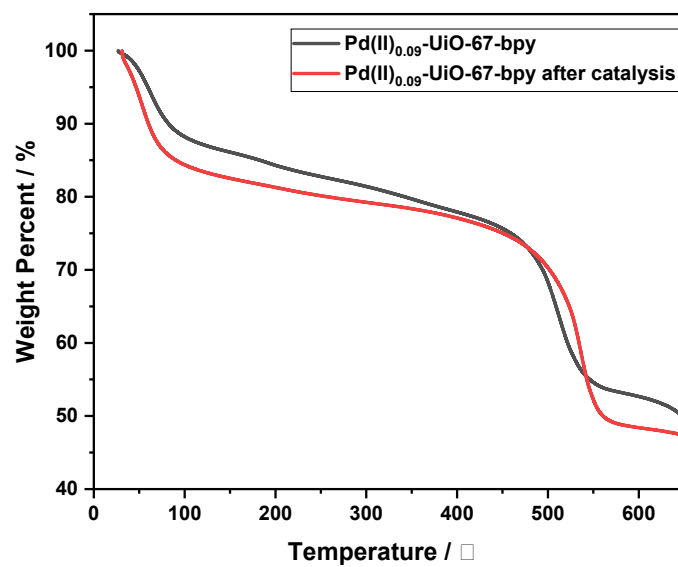

**Figure S8.** TGA images of Pd(II)<sub>0.09</sub>-UiO-67-bpy before and after catalysis.

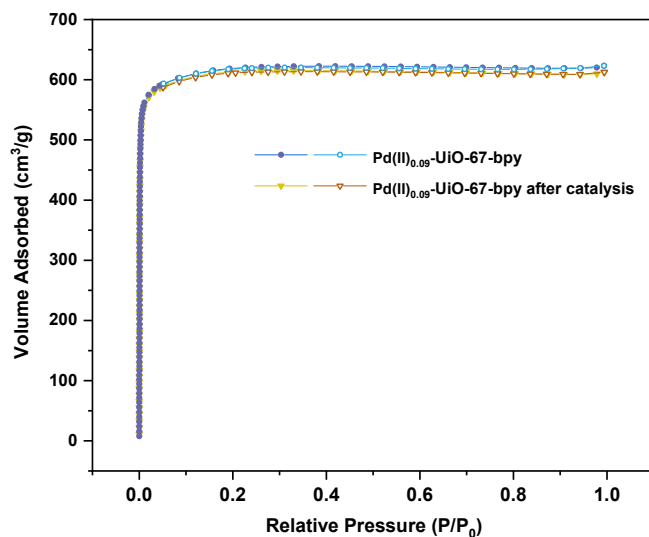

**Figure S9.** BET images of Pd(II)<sub>0.09</sub>-UiO-67-bpy before and after catalysis.

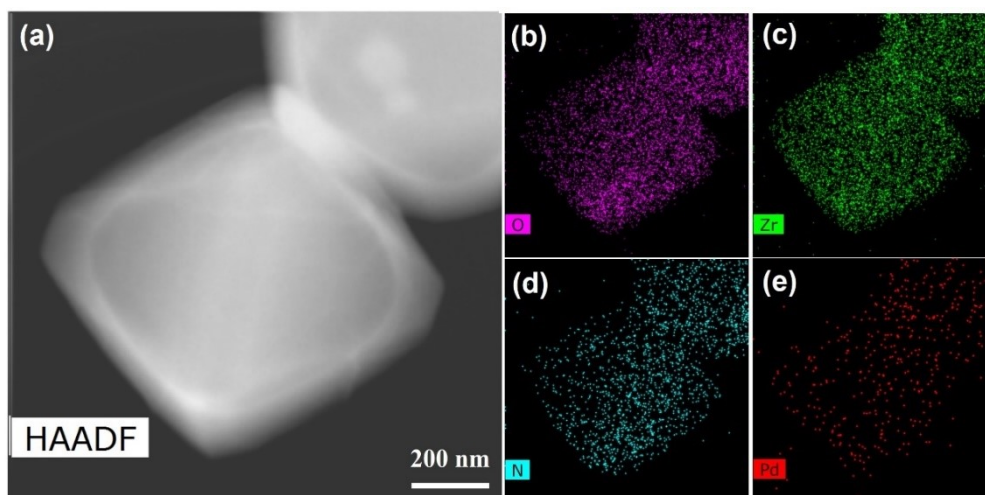

**Figure S10.** TEM image of (a) Pd(II)<sub>0.08</sub>-UiO-67-bpy after catalysis and corresponding EDS mapping (b) O, (c) Zr, (d) N and (e) Pd.

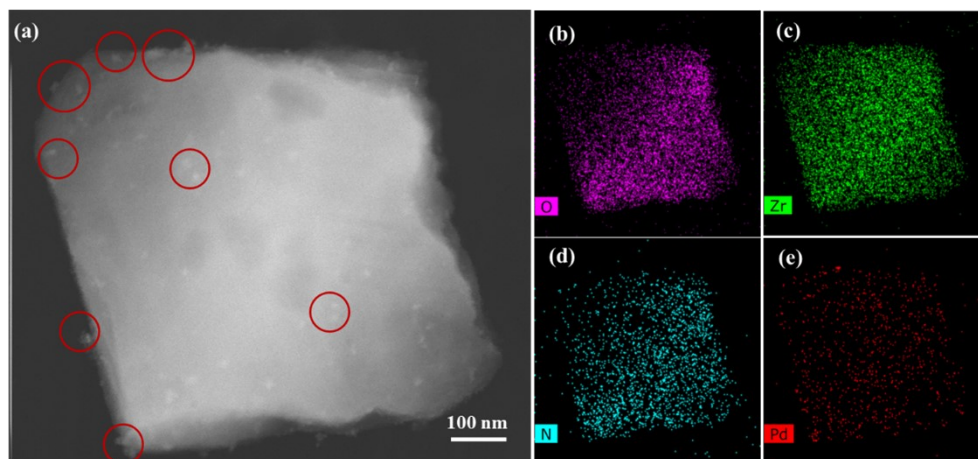



**Figure S11.** TEM image of (a) Pd(II)<sub>0.25</sub>-UiO-67-bpy after catalysis and corresponding EDS mapping (b) O, (c) Zr, (d) N and (e) Pd.

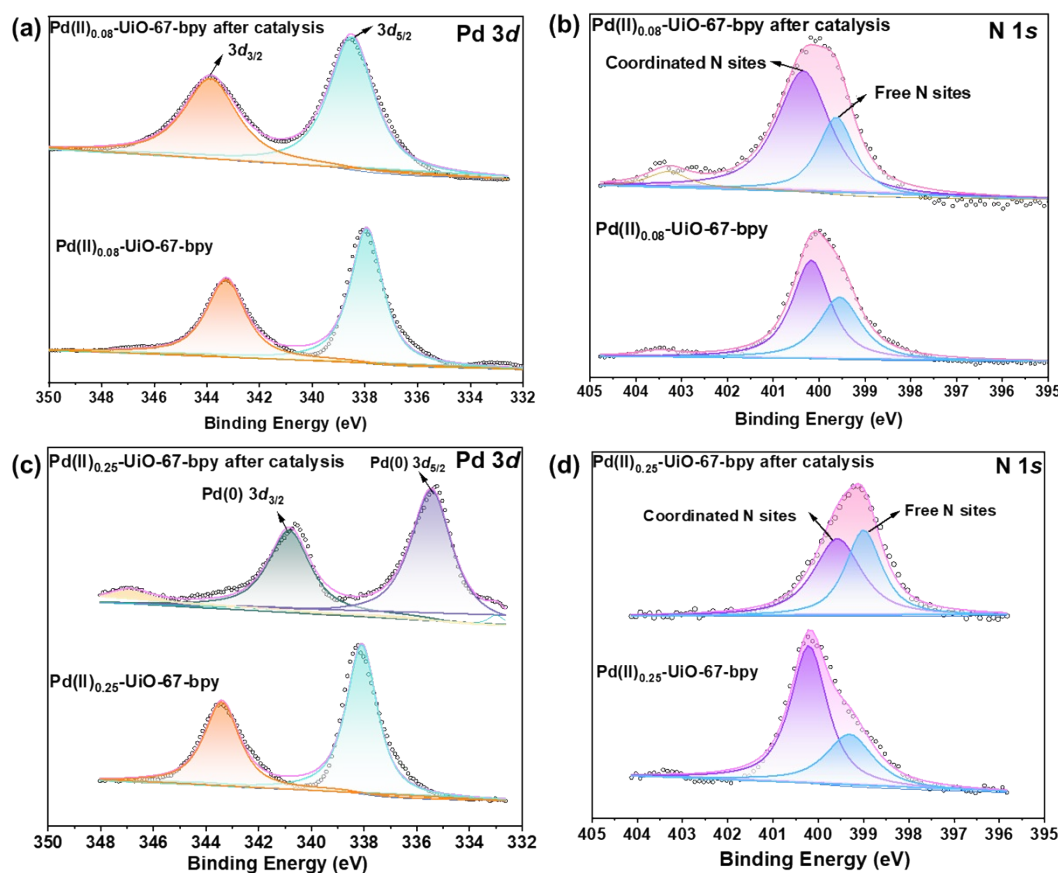

**Figure S12.** XPS profiles of catalysts. (a) Pd 3d level for Pd(II)<sub>0.08</sub>-UiO-67-bpy, (b) N 1s level for Pd(II)<sub>0.08</sub>-UiO-67-bpy, (c) Pd 3d level for Pd(II)<sub>0.25</sub>-UiO-67-bpy, (d) N 1s level for Pd(II)<sub>0.25</sub>-UiO-67-bpy.

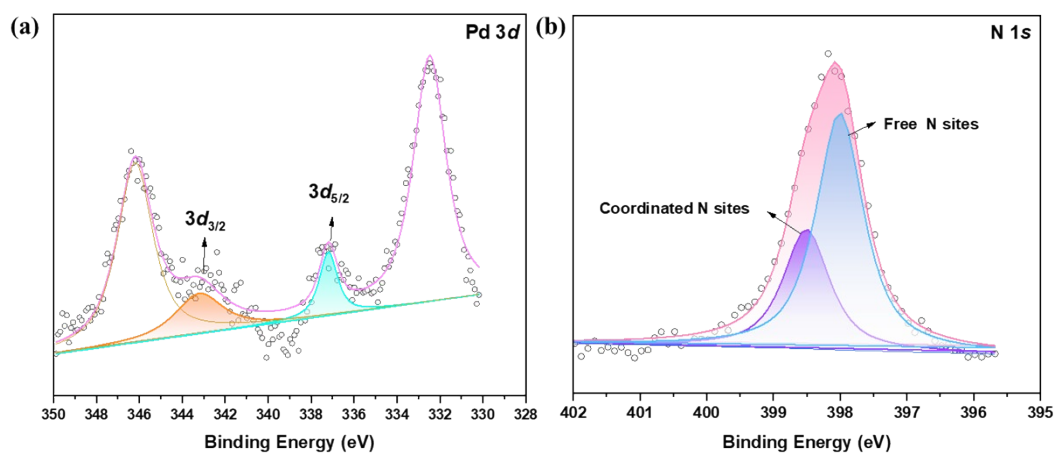

**Figure S13.** (a) Pd 3d level and (b) N 1s level for Pd(II)<sub>0.09</sub>-UiO-67-bpy after catalysis via path b.

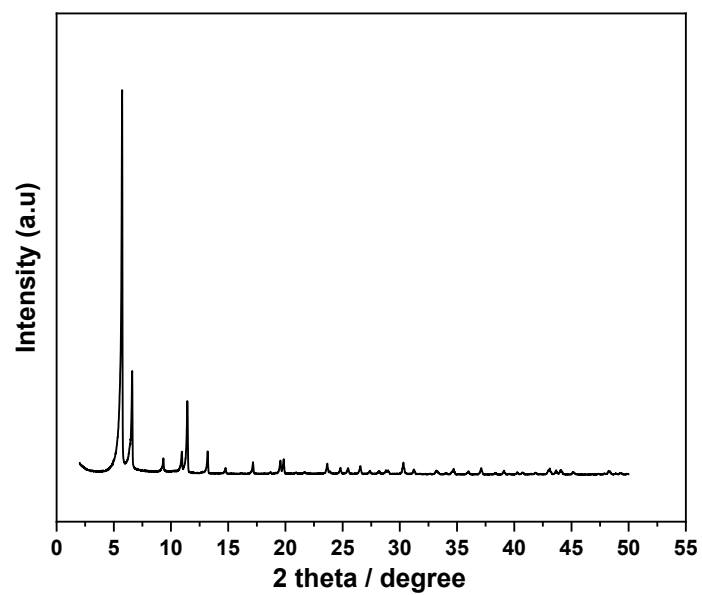

**Figure S14.** PXRD spectral of Pd(II)<sub>0.09</sub>-UiO-67-bpy after catalysis *via* path b.

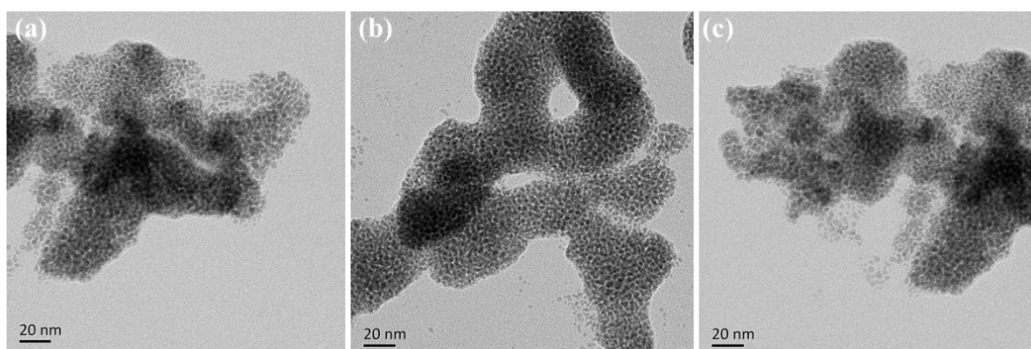

**Figure S15.** TEM images of homogeneous system I and II after catalysis. (a) TEM image of Pd species in homogeneous I when the reaction proceeded for 40 min, (b) 60 min, (c) TEM image of Pd species in homogeneous II when the reaction proceeded for 60 min.

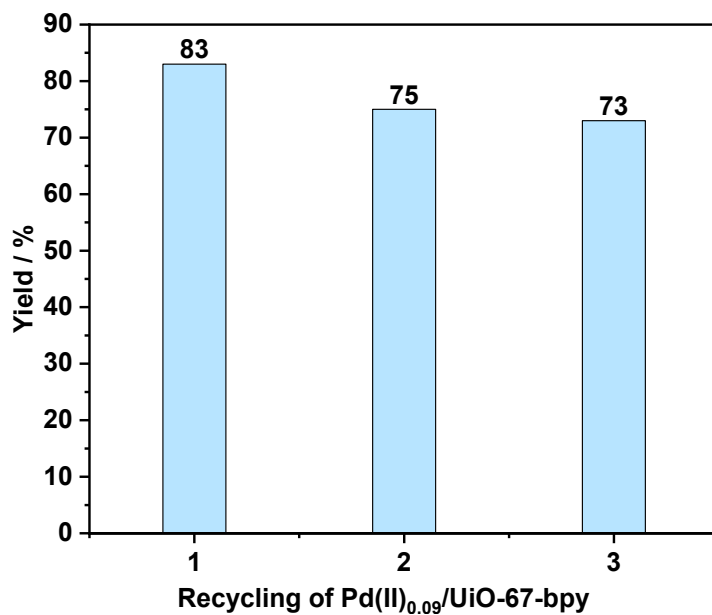

**Figure S16.** Reusability of Pd(II)<sub>0.09</sub>-UiO-67-bpy

**Table S1.** Screening of the amount of Na<sub>2</sub>CO<sub>3</sub>

Reaction scheme: **1a** + **2a**  $\xrightarrow{\text{catalyst}}$  **4a**

| Entry | Base (equiv)                          | Yield (%) | TON  |
|-------|---------------------------------------|-----------|------|
| 1     | Na <sub>2</sub> CO <sub>3</sub> (1.0) | 71        | 443  |
| 2     | Na <sub>2</sub> CO <sub>3</sub> (0.5) | 68        | 425  |
| 3     | Na <sub>2</sub> CO <sub>3</sub> (0.3) | 33        | 206  |
| 4     | Na <sub>2</sub> CO <sub>3</sub> (0)   | n.d.      | n.d. |

<sup>a</sup>The reaction conditions were: **1a** (0.1 mmol), **2a** (0.15 mmol), Pd(II)<sub>0.09</sub>-UiO-67-bpy (Pd 0.16 mol %), dry DMSO (1 mL), air, 25 °C and 12 h. Yield of **4a** was determined by <sup>1</sup>H NMR using CH<sub>2</sub>Br<sub>2</sub> as an internal standard. n.d. = not detected.

**Table S2.** Screening of the ratio of Pd(OAc)<sub>2</sub>: bpy in Pd(II)<sub>x</sub>-UiO-bpy.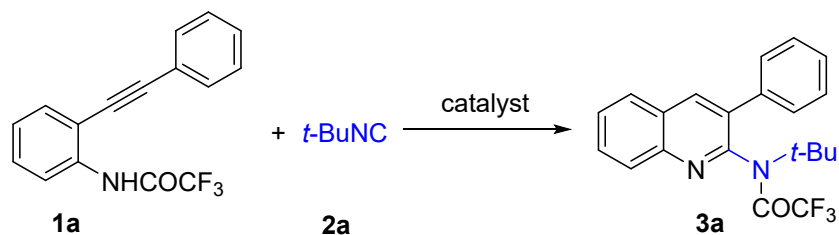

| Entry | Catalyst                                                 | Yield (%) | TON |
|-------|----------------------------------------------------------|-----------|-----|
| 1     | Pd(II) <sub>0.08</sub> -UiO-67-bpy (2 mg, Pd 0.07 mol %) | 50        | 714 |
| 2     | Pd(II) <sub>0.08</sub> -UiO-67-bpy (4 mg, Pd 0.14 mol %) | 51        | 364 |
| 3     | Pd(II) <sub>0.08</sub> -UiO-67-bpy (8 mg, Pd 0.28 mol %) | 71        | 254 |
| 4     | Pd(II) <sub>0.09</sub> -UiO-67-bpy (2 mg, Pd 0.08 mol %) | 60        | 750 |
| 5     | Pd(II) <sub>0.09</sub> -UiO-67-bpy (4 mg, Pd 0.16 mol %) | 83        | 519 |
| 6     | Pd(II) <sub>0.09</sub> -UiO-67-bpy (8 mg, Pd 0.32 mol %) | 76        | 238 |
| 7     | Pd(II) <sub>0.15</sub> -UiO-67-bpy (2 mg, Pd 0.14 mol %) | 74        | 529 |
| 8     | Pd(II) <sub>0.15</sub> -UiO-67-bpy (4 mg, Pd 0.28 mol %) | 48        | 174 |
| 9     | Pd(II) <sub>0.15</sub> -UiO-67-bpy (8 mg, Pd 0.56 mol %) | 50        | 89  |
| 10    | Pd(II) <sub>0.25</sub> -UiO-67-bpy (2 mg, Pd 0.23 mol %) | 78        | 339 |
| 11    | Pd(II) <sub>0.25</sub> -UiO-67-bpy (4 mg, Pd 0.46 mol %) | 77        | 167 |
| 12    | Pd(II) <sub>0.25</sub> -UiO-67-bpy (8 mg, Pd 0.92 mol %) | 78        | 85  |
| 13    | Pd(OAc) <sub>2</sub> (0.16 mol%)                         | n.d.      | -   |
| 14    | Pd(OAc) <sub>2</sub> (10 mol%)                           | 32        | 3.2 |

<sup>a</sup>The reaction conditions were: **1a** (0.1 mmol), **2a** (0.15 mmol), Li<sub>2</sub>CO<sub>3</sub> (30 mol %), dry DMSO (1 mL), N<sub>2</sub>, 100 °C and 1 h. Yield of **3a** was determined by <sup>19</sup>F NMR using CF<sub>3</sub>Ph as an internal standard. n.d. = not detected.

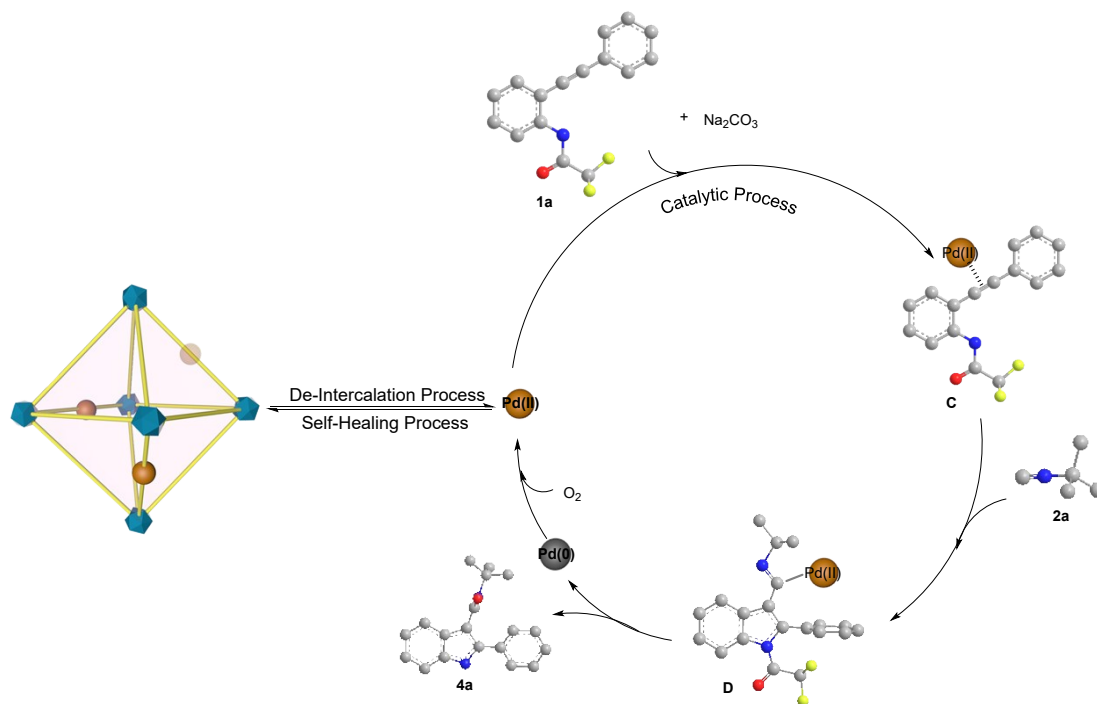

**Scheme S1.** Possible reaction mechanism of Pd(II)<sub>0.09</sub>-UiO-67-bpy-catalyzed cyclization of isonitriles with *N*-acyl-*o*-alkynylanilines for 1*H*-indole-3-carboxamides.

#### 4. Characterization Data for All Products

##### *N*-(*tert*-Butyl)-2,2,2-trifluoro-*N*-(3-phenylquinolin-2-yl)acetamide (**3a**)<sup>2</sup>

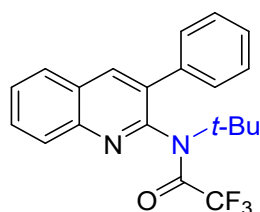

Yellow solid (31 mg, 83%); <sup>1</sup>H NMR (400 MHz, Chloroform-*d*) δ 8.21 (s, 1H), 8.12 (d, *J* = 8.4 Hz, 1H), 7.90 (d, *J* = 7.8 Hz, 1H), 7.76 (m, 1H), 7.65 (t, *J* = 16.1 Hz, 1H), 7.53 – 7.41 (m, 5H), 1.14 (s, 9H); <sup>13</sup>C NMR (100 MHz, Chloroform-*d*) δ 158.1, 157.7, 146.1, 139.1, 137.8, 134.8, 130.3, 129.6, 129.0, 128.6, 128.3, 128.2, 127.5, 117.8, 114.9, 62.9, 27.4 ppm; <sup>19</sup>F NMR (376 MHz, Chloroform-*d*) δ -67.64.

##### *N*-(*tert*-Butyl)-2,2,2-trifluoro-*N*-(6-fluoro-3-phenylquinolin-2-yl)acetamide (**3b**)<sup>2</sup>

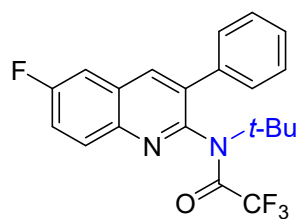

Yellow solid (30 mg, 78%);  $^1\text{H}$  NMR (400 MHz, Chloroform-*d*)  $\delta$  8.18 (s, 1H), 8.14 (dd,  $J = 9.1, 5.3$  Hz, 1H), 7.59 – 7.44 (m, 7H), 1.16 (s, 9H);  $^{13}\text{C}$  NMR (100 MHz, Chloroform-*d*)  $\delta$  162.9, 160.4, 157.9 (q,  $J = 34.6$  Hz), 149.2 (d,  $J = 2.8$  Hz), 143.2, 138.4, 138.3, 137.5, 135.7, 132.3, 132.2, 129.9, 129.1-129.0 (m), 128.8, 120.7 (d,  $J = 25.9$  Hz), 117.8, 114.9, 110.7, 110.5, 63.0, 27.4 ppm;  $^{19}\text{F}$  NMR (376 MHz, Chloroform-*d*)  $\delta$  -67.69, -110.85 (td,  $J = 8.4, 5.3$  Hz).

***N*-(*tert*-Butyl)-2,2,2-trifluoro-*N*-(3-phenyl-6-(trifluoromethyl)quinolin-2-yl)acetamide (3c)<sup>2</sup>**

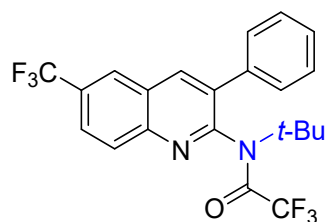

Yellow solid (40 mg, 91%);  $^1\text{H}$  NMR (400 MHz, Chloroform-*d*)  $\delta$  8.31 (s, 1H), 8.24 (d,  $J = 9.5$  Hz, 2H), 7.95 (dd,  $J = 8.8, 1.8$  Hz, 1H), 7.55 – 7.43 (m, 5H), 1.15 (s, 9H);  $^{13}\text{C}$  NMR (100 MHz, Chloroform-*d*)  $\delta$  157.9 (q,  $J = 34.9$  Hz), 151.8, 147.1, 139.8, 137.1, 136.3, 130.9, 129.9 (d,  $J = 7.0$  Hz), 129.2, 129.1, 127.3, 126.0 (q,  $J = 2.9$  Hz), 125.5 (q,  $J = 4.4$  Hz), 117.7, 63.3, 27.4 ppm;  $^{19}\text{F}$  NMR (376 MHz, Chloroform-*d*)  $\delta$  -62.58, -67.65.

***N*-(*tert*-Butyl)-2,2,2-trifluoro-*N*-(6-methyl-3-phenylquinolin-2-yl)acetamide (3d)<sup>2</sup>**

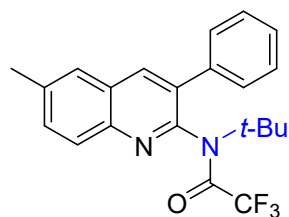

Yellow solid (26 mg, 67%);  $^1\text{H}$  NMR (400 MHz, Chloroform-*d*)  $\delta$  8.11 (s, 1H), 8.01

(d,  $J = 8.6$  Hz, 1H), 7.66 (s, 1H), 7.60 (d,  $J = 8.6$  Hz, 1H), 7.52 – 7.41 (m, 5H), 2.58 (s, 3H), 1.13 (s, 9H);  $^{13}\text{C}$  NMR (100 MHz, Chloroform-*d*)  $\delta$  158.0 (d,  $J = 34.6$  Hz), 148.9, 144.7, 138.4, 138.0, 134.7, 132.7, 130.0, 129.3, 129.0, 128.5, 128.4, 126.3, 117.8, 114.9, 62.9, 27.4, 21.8 ppm;  $^{19}\text{F}$  NMR (376 MHz, Chloroform-*d*)  $\delta$  -67.67.

***N*-(*tert*-Butyl)-2,2,2-trifluoro-*N*-(6-methoxy-3-phenylquinolin-2-yl)acetamide**

**(3e)<sup>2</sup>**

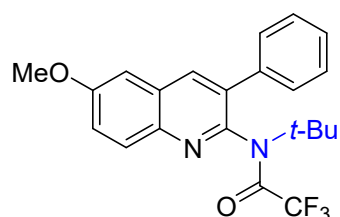

White solid (22 mg, 54%);  $^1\text{H}$  NMR (400 MHz, Chloroform-*d*)  $\delta$  8.09 (s, 1H), 8.00 (d,  $J = 9.2$  Hz, 1H), 7.50 – 7.40 (m, 6H), 7.14 (d,  $J = 2.7$  Hz, 1H), 3.95 (s, 3H), 1.13 (s, 9H);  $^{13}\text{C}$  NMR (100 MHz, Chloroform-*d*)  $\delta$  159.1, 157.7 (q,  $J = 34.6$  Hz), 147.3, 142.0, 137.9, 137.6, 134.9, 130.9, 129.8, 129.4, 128.9, 128.3, 123.1, 117.7, 114.8, 104.7, 62.7, 55.7, 27.2 ppm;  $^{19}\text{F}$  NMR (376 MHz, Chloroform-*d*)  $\delta$  -67.67.

***N*-(*tert*-Butyl)-2,2,2-trifluoro-*N*-(7-fluoro-3-phenylquinolin-2-yl)acetamide (3f)<sup>2</sup>**

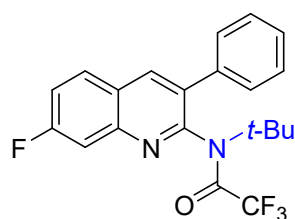

Yellow solid (35 mg, 90%);  $^1\text{H}$  NMR (400 MHz, Chloroform-*d*)  $\delta$  8.21 (s, 1H), 7.90 (dd,  $J = 9.0, 5.9$  Hz, 1H), 7.75 (dd,  $J = 9.8, 2.5$  Hz, 1H), 7.52 – 7.41 (m, 6H), 1.14 (s, 9H);  $^{13}\text{C}$  NMR (100 MHz, Chloroform-*d*)  $\delta$  164.9, 162.4, 157.9 (d,  $J = 34.9$  Hz), 150.7, 147.2 (d,  $J = 13.0$  Hz), 139.0, 137.5, 134.2, 129.9, 129.6 (d,  $J = 10.0$  Hz), 129.1, 128.6, 125.4, 118.9 (d,  $J = 25.6$  Hz), 117.8, 114.9, 113.4 (d,  $J = 20.7$  Hz), 63.1, 27.4 ppm;  $^{19}\text{F}$  NMR (376 MHz, Chloroform-*d*)  $\delta$  -67.66, -107.96 (dd,  $J = 13.9$  Hz).

***N*-(*tert*-Butyl)-2,2,2-trifluoro-*N*-(7-methyl-3-phenylquinolin-2-yl)acetamide (3g)<sup>2</sup>**

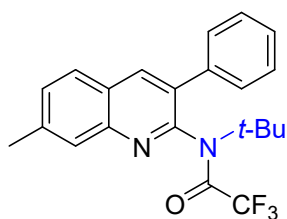

Yellow solid (24 mg, 63%); <sup>1</sup>H NMR (400 MHz, Chloroform-*d*)  $\delta$  8.16 (s, 1H), 7.91 (s, 1H), 7.79 (d,  $J = 8.3$  Hz, 1H), 7.52 – 7.41 (m, 6H), 2.60 (s, 3H), 1.14 (s, 9H); <sup>13</sup>C NMR (100 MHz, Chloroform-*d*)  $\delta$  158.0 (d,  $J = 34.7$  Hz), 149.6, 146.4, 140.9, 138.8, 138.0, 133.9, 130.5, 129.9, 129.0, 128.6, 128.4, 127.2, 126.4, 117.8, 115.0, 62.9, 27.4, 22.0 ppm; <sup>19</sup>F NMR (376 MHz, Chloroform-*d*)  $\delta$  -67.65.

***N*-(*tert*-Butyl)-2,2,2-trifluoro-*N*-(7-methoxy-3-phenylquinolin-2-yl)acetamide (3h)**

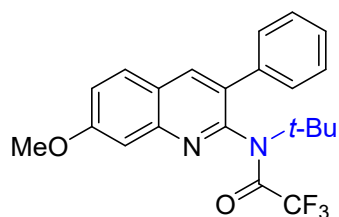

Yellow solid (25 mg, 63%); <sup>1</sup>H NMR (400 MHz, Chloroform-*d*)  $\delta$  8.13 (s, 1H), 7.77 (d,  $J = 9.0$  Hz, 1H), 7.50 – 7.39 (m, 6H), 7.29 (dd,  $J = 8.9, 2.5$  Hz, 1H), 3.99 (s, 3H), 1.14 (s, 9H); <sup>13</sup>C NMR (101 MHz, Chloroform-*d*)  $\delta$  161.6, 157.7, 149.8, 148.0, 138.9, 138.0, 132.4, 129.9, 129.0, 128.5, 128.3, 123.6, 121.7, 117.8, 115.0, 107.3, 62.9, 55.9, 27.4 ppm; <sup>19</sup>F NMR (376 MHz, Chloroform-*d*)  $\delta$  -67.61.  $\nu_{\max}$ (KBr)/cm<sup>-1</sup> 2935, 1695, 1621, 1492, 1374, 1029, 932, 758, 704, 480; HRMS-ESI (*m/z*): calcd for C<sub>22</sub>H<sub>22</sub>F<sub>3</sub>N<sub>2</sub>O<sub>2</sub>, [M+H]<sup>+</sup>: 403.1628, found 403.1622.

***N*-(*tert*-Butyl)-2,2,2-trifluoro-*N*-(3-(4-(trifluoromethyl)phenyl)quinolin-2-yl)acetamide (3i)<sup>2</sup>**

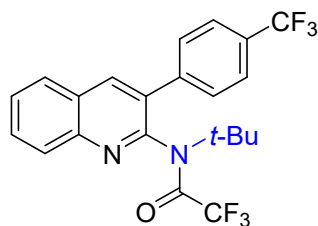



Yellow solid (35 mg, 80%);  $^1\text{H}$  NMR (400 MHz, Chloroform-*d*)  $\delta$  8.23 (s, 1H), 8.14 (d,  $J = 8.4$  Hz, 1H), 7.93 (d,  $J = 8.2$  Hz, 1H), 7.80 (dd,  $J = 20.8, 7.6$  Hz, 3H), 7.68 (t,  $J = 8.0$  Hz, 1H), 7.59 (d,  $J = 8.2$  Hz, 2H), 1.16 (s, 9H);  $^{13}\text{C}$  NMR (100 MHz, Chloroform-*d*)  $\delta$  158.1 (d,  $J = 34.7$  Hz), 149.2, 146.5, 141.6, 139.4, 133.3, 130.9, 130.3, 129.7, 128.6, 128.1, 127.6, 126.0 (q,  $J = 37$  Hz), 120.9 (d,  $J = 41.7$  Hz), 117.7, 114.9, 63.2, 27.5 ppm;  $^{19}\text{F}$  NMR (376 MHz, Chloroform-*d*)  $\delta$  -62.66, -67.66.

***N*-(*tert*-Butyl)-2,2,2-trifluoro-*N*-(3-(*p*-tolyl)quinolin-2-yl)acetamide (3j)<sup>2</sup>**

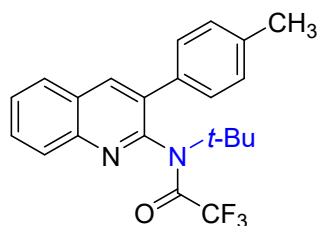

Red solid (22 mg, 55%);  $^1\text{H}$  NMR (400 MHz, Chloroform-*d*)  $\delta$  8.21 (s, 1H), 8.13 (d,  $J = 8.4$  Hz, 1H), 7.91 (d,  $J = 8.1$  Hz, 1H), 7.79 (t,  $J = 7.0$  Hz, 1H), 7.66 (t,  $J = 7.5$  Hz, 1H), 7.35 (q, 4H), 2.45 (s, 3H), 1.18 (s, 9H);  $^{13}\text{C}$  NMR (100 MHz, Chloroform-*d*)  $\delta$  158.1 (q,  $J = 34.5$  Hz), 149.8, 146.0, 138.9, 138.5, 134.9, 129.8, 129.7, 129.6, 128.4, 128.1, 127.5, 117.8, 114.9, 62.9, 27.4, 21.3 ppm;  $^{19}\text{F}$  NMR (376 MHz, Chloroform-*d*)  $\delta$  -67.68.

***N*-(*tert*-Butyl)-2,2,2-trifluoro-*N*-(3-(4-methoxyphenyl)quinolin-2-yl)acetamide (3k)<sup>2</sup>**

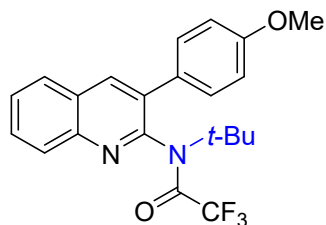

Yellow solid (22 mg, 54%);  $^1\text{H}$  NMR (400 MHz, Chloroform-*d*)  $\delta$  8.17 (s, 1H), 8.10 (d,  $J = 8.5$  Hz, 1H), 7.88 (d,  $J = 8.2$  Hz, 1H), 7.75 (t,  $J = 7.2$  Hz, 1H), 7.62 (t,  $J = 7.2$  Hz, 1H), 7.37 (d,  $J = 6.7$  Hz, 2H), 7.02 (d,  $J = 8.8$  Hz, 2H), 3.87 (s, 3H), 1.16 (s, 9H);  $^{13}\text{C}$  NMR (100 MHz, Chloroform-*d*)  $\delta$  159.9, 158.0 (q,  $J = 34.6$  Hz), 149.8, 145.9, 138.7,

134.5, 131.2, 130.1, 130.0, 129.6, 128.4, 128.1, 127.4, 117.8, 114.5, 62.9, 55.5, 27.4 ppm;  $^{19}\text{F}$  NMR (376 MHz, Chloroform-*d*)  $\delta$  -67.67.

***N*-(*tert*-Butyl)-2,2,3,3,3-pentafluoro-*N*-(3-phenylquinolin-2-yl)propanamide (3l)<sup>2</sup>**

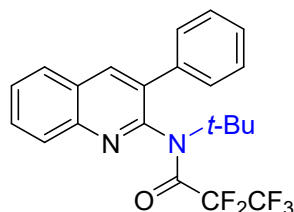

Yellow solid (25 mg, 58%);  $^1\text{H}$  NMR (400 MHz, Chloroform-*d*)  $\delta$  8.21 (s, 1H), 8.11 (d,  $J = 8.2$  Hz, 1H), 7.90 (d,  $J = 7.4$  Hz, 1H), 7.78 (t,  $J = 7.6$  Hz, 1H), 7.65 (t,  $J = 7.6$  Hz, 1H), 7.52 – 7.43 (m, 5H), 1.14 (s, 9H);  $^{13}\text{C}$  NMR (100 MHz, Chloroform-*d*)  $\delta$  159.1 (t,  $J = 23.6$  Hz), 149.5, 146.1, 138.9, 137.9, 134.7, 130.3, 129.9, 129.7, 129.0, 128.5, 128.3, 128.2, 127.5, 119.9, 117.0, 63.3, 27.3 ppm;  $^{19}\text{F}$  NMR (376 MHz, Chloroform-*d*)  $\delta$  -80.71, -111.99 (d,  $J = 10.0$  Hz).

***N*-Cyclohexyl-2,2,2-trifluoro-*N*-(3-phenylquinolin-2-yl)acetamide (3m)<sup>2</sup>**

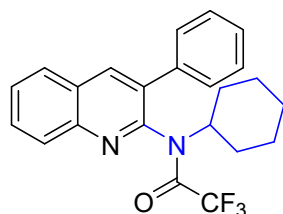

Yellow solid (14 mg, 35%);  $^1\text{H}$  NMR (400 MHz, Chloroform-*d*)  $\delta$  8.21 (s, 1H), 8.10 (d,  $J = 8.5$  Hz, 1H), 7.89 (d,  $J = 8.1$  Hz, 1H), 7.77 (dd,  $J = 7.7$  Hz, 1H), 7.63 (t,  $J = 7.5$  Hz, 1H), 7.51-7.43 (m, 5H), 3.39-3.49 (m, 1H), 1.80-1.65 (m, 3H), 1.76-1.66 (m, 2H), 1.56 (t, 2H), 1.45-1.36 (m, 2H), 1.08-0.83 (m, 4H);  $^{13}\text{C}$  NMR (101 MHz, Chloroform-*d*)  $\delta$  158.55 (q,  $J = 35.5$  Hz), 150.5, 146.1, 139.8, 137.3, 130.0, 129.5, 129.4, 129.0, 128.7, 128.1, 128.0, 127.5, 117.8, 114.9, 63.8, 29.0, 28.2, 26.3, 26.0, 25.3 ppm;  $^{19}\text{F}$  NMR (376 MHz, Chloroform-*d*)  $\delta$  -68.18.

***N*-(Adamantan-1-yl)-2,2,2-trifluoro-*N*-(3-phenylquinolin-2-yl)acetamide (3n)<sup>2</sup>**

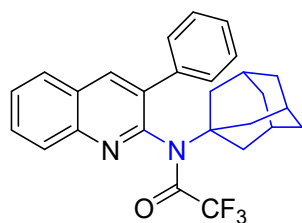

Yellow solid (25 mg, 56%); <sup>1</sup>H NMR (400 MHz, Chloroform-*d*)  $\delta$  8.19 (s, 1H), 8.15 (d, *J* = 8.4 Hz, 1H), 7.90 (d, *J* = 8.1 Hz, 1H), 7.81-7.76 (m, 1H), 7.65 (t, *J* = 7.5 Hz, 1H), 7.52-7.41 (m, 5H), 2.02 (d, *J* = 11.5 Hz, 3H), 1.88 (s, 3H), 1.61 (d, *J* = 11.5 Hz, 3H), 1.49-1.41 (m, 6H); <sup>13</sup>C NMR (101 MHz, Chloroform-*d*)  $\delta$  157.37 (q, *J* = 34.5 Hz), 149.1, 145.9, 138.9, 137.9, 135.2, 129.6, 128.9, 128.6, 128.2, 127.5, 117.7, 114.8, 64.7, 38.6, 30.1 ppm; <sup>19</sup>F NMR (376 MHz, Chloroform-*d*)  $\delta$  -67.65.

**2,2,2-Trifluoro-*N*-(3-Phenylquinolin-2-yl)-*N*-(2,4,4-trimethylpentan-2-yl)acetamide (3o)<sup>2</sup>**

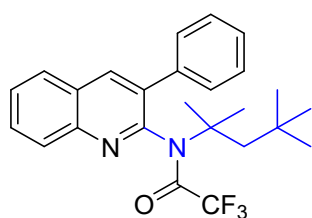

Yellow solid (28 mg, 65%); <sup>1</sup>H NMR (400 MHz, Chloroform-*d*)  $\delta$  8.19 (s, 1H), 8.13 (d, *J* = 8.4 Hz, 1H), 7.90 (d, *J* = 8.0 Hz, 1H), 7.78 (t, *J* = 7.7 Hz, 1H), 7.65 (t, *J* = 8.0 Hz, 1H), 7.52-7.39 (m, 5H), 2.36 (d, *J* = 14.6 Hz, 1H), 1.27 (s, 4H), 0.93 (s, 3H), 0.90 (s, 9H); <sup>13</sup>C NMR (101 MHz, Chloroform-*d*)  $\delta$  157.6 (q, *J* = 34.5 Hz), 149.7, 146.1, 139.1, 137.9, 135.2, 130.3, 130.1, 129.6, 129.0, 128.5, 128.2, 128.2, 127.5, 117.9, 114.9, 67.9, 49.9, 31.7, 31.5, 27.5, 27.0 ppm; <sup>19</sup>F NMR (376 MHz, Chloroform-*d*)  $\delta$  -67.51.

***N*-Cyclopentyl-2,2,2-trifluoro-*N*-(3-phenylquinolin-2-yl)acetamide (3p)<sup>2</sup>**

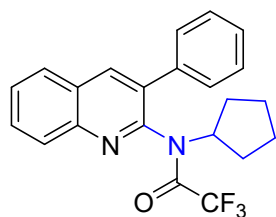

Yellow solid (14 mg, 37%);  $^1\text{H}$  NMR (400 MHz, Chloroform-*d*)  $\delta$  8.23 (s, 1H), 8.10 (d,  $J = 8.5$  Hz, 1H), 7.90 (d,  $J = 8.1$  Hz, 1H), 7.78 (t,  $J = 7.5$  Hz, 1H), 7.64 (t,  $J = 7.5$  Hz, 1H), 7.48-7.43 (m, 5H), 3.87 (p,  $J = 8.3$  Hz, 1H), 1.70-1.50 (m, 8H);  $^{13}\text{C}$  NMR (101 MHz, Chloroform-*d*)  $\delta$  150.5, 139.7, 130.5, 129.4, 129.1, 128.6, 128.1, 127.6, 64.1, 24.6, 24.2 ppm;  $^{19}\text{F}$  NMR (376 MHz, Chloroform-*d*)  $\delta$  -68.27;  $\nu_{\text{max}}$ (KBr)/ $\text{cm}^{-1}$  2956, 1699, 1584, 1487, 1410, 1371, 1186, 760, 701, 595, 482.  $[\text{M}+\text{H}]^+$ : 385.1522, found 385.1518.

***N*-tert-Butyl-2-phenyl-1*H*-indole-3-carboxamide (4a)<sup>3</sup>**

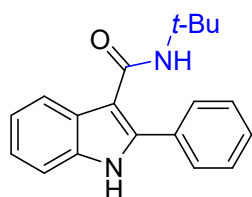

White solid (19 mg, 65%);  $^1\text{H}$  NMR (400 MHz, DMSO-*d*<sub>6</sub>)  $\delta$  11.64 (s, 1H), 7.73-7.69 (m, 3H), 7.52-7.48 (m, 2H), 7.43-7.40 (m, 2H), 7.19-7.13 (m, 1H), 7.12-7.06 (m, 2H), 1.32 (s, 9H);  $^{13}\text{C}$  NMR (101 MHz, DMSO-*d*<sub>6</sub>)  $\delta$  165.1, 135.4, 128.5, 128.3, 128.3, 122.1, 120.0, 119.9, 111.4, 50.4, 28.6 ppm.

***N*-tert-Butyl-2-phenyl-5-trifluoromethyl-1*H*-indole-3-carboxamide (4b)<sup>3</sup>**

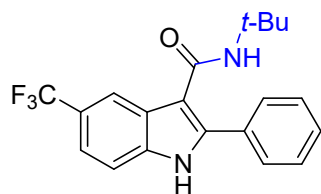

White solid (18 mg, 52%);  $^1\text{H}$  NMR (400 MHz, DMSO-*d*<sub>6</sub>)  $\delta$  12.12 (s, 1H), 8.04 (s, 1H), 7.74 (d,  $J = 8.5$  Hz, 2H), 7.60 (d,  $J = 8.5$  Hz, 1H), 7.54 (t,  $J = 7.4$  Hz, 2H), 7.47 (t,  $J = 7.3$  Hz, 2H), 1.30 (s, 9H);  $^{13}\text{C}$  NMR (101 MHz, DMSO-*d*<sub>6</sub>)  $\delta$  164.3, 139.2, 136.9,

131.1, 128.9, 128.6, 126.8, 118.5, 117.3, 112.3, 111.4, 50.5, 39.5, 28.5 ppm.

***N*-tert-Butyl-5-methyl-2-phenyl-1*H*-indole-3-carboxamide (4c)<sup>3</sup>**

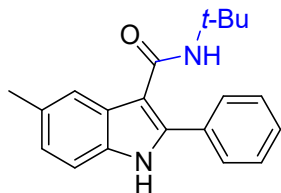

White solid (21 mg, 68%); <sup>1</sup>H NMR (400 MHz, DMSO-*d*<sub>6</sub>) δ 11.51 (s, 1H), 7.71-7.69 (m, 2H), 7.51-7.45 (m, 3H), 7.43-7.39 (m, 1H), 7.42 (m, 1H), 7.29 (d, *J* = 8.2 Hz, 1H), 7.02-6.93 (m, 2H), 2.40 (s, 3H), 1.31 (s, 9H); <sup>13</sup>C NMR (101 MHz, DMSO-*d*<sub>6</sub>) δ 165.1, 136.7, 133.8, 131.9, 128.4, 128.3, 128.2, 127.7, 123.7, 119.5, 111.1, 110.5, 50.3, 21.4 ppm.

***N*-tert-Butyl-2-(4-trifluoromethyl)-1*H*-indole-3-carboxamide (4d)**

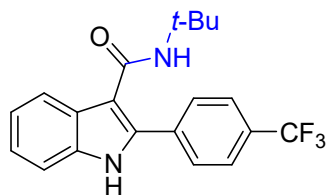

White solid (12 mg, 32%); <sup>1</sup>H NMR (400 MHz, DMSO-*d*<sub>6</sub>) δ 11.82 (s, 1H), 7.94 (d, *J* = 8.2 Hz, 2H), 7.86 (d, *J* = 8.4 Hz, 2H), 7.66 (d, *J* = 7.9 Hz, 1H), 7.52 (s, 1H), 7.45 (d, *J* = 8.1 Hz, 1H), 7.20 (t, *J* = 8.0 Hz, 1H), 7.12 (t, *J* = 7.8 Hz, 1H), 1.36 (s, 9H); <sup>13</sup>C NMR (101 MHz, DMSO-*d*<sub>6</sub>) δ 164.9, 135.9, 135.7, 134.5, 128.6, 127.1, 122.8, 120.3, 119.9, 112.8, 111.6, 50.6, 28.5 ppm;  $\nu_{\max}$ (KBr)/cm<sup>-1</sup> 3700, 3011, 1590, 1518, 1446, 1322, 1168, 1113, 1064, 747, 471; HRMS-ESI (*m/z*): calcd for C<sub>20</sub>H<sub>19</sub>F<sub>3</sub>N<sub>2</sub>O<sub>1</sub>, [M+H]<sup>+</sup>: 361.1517, found 361.1522.

***N*-tert-Butyl-2-*p*-tolyl-1*H*-indole-3-carboxamide (4e)<sup>3</sup>**

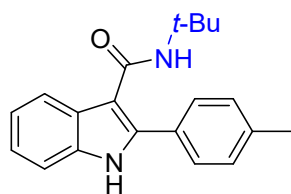

White solid (8 mg, 26%);  $^1\text{H}$  NMR (400 MHz,  $\text{DMSO-}d_6$ )  $\delta$  11.57 (s, 1H), 7.69 (d,  $J = 7.8$  Hz, 1H), 7.62 (d,  $J = 8.0$  Hz, 2H), 7.39 (d,  $J = 8.0$  Hz, 1H), 7.31 (d,  $J = 8.0$  Hz, 2H), 7.14 (t,  $J = 7.5$  Hz, 1H), 7.07 (s, 1H), 7.06 (s, 1H), 2.37 (s, 3H), 1.32 (s, 9H);  $^{13}\text{C}$  NMR (101 MHz,  $\text{DMSO-}d_6$ )  $\delta$  165.1, 137.7, 136.8, 135.3, 129.0, 128.2, 127.4, 121.9, 119.9, 119.7, 111.3, 50.3, 39.5, 28.6, 20.9 ppm.

***N*-tert-Butyl-2-(4-methoxyphenyl)-1*H*-indole-3-carboxamide (4f)<sup>3</sup>**

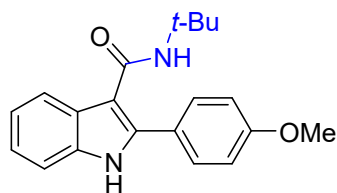

White solid (24 mg, 74%);  $^1\text{H}$  NMR (400 MHz,  $\text{DMSO-}d_6$ )  $\delta$  11.53 (s, 1H), 7.71 (d,  $J = 7.8$  Hz, 1H), 7.67 (d,  $J = 8.8$  Hz, 2H), 7.38 (d,  $J = 7.9$  Hz, 1H), 7.13 (t,  $J = 7.5$  Hz, 1H), 7.07 (d,  $J = 8.8$  Hz, 3H), 6.97 (s, 1H), 3.82 (s, 3H), 1.32 (s, 9H);  $^{13}\text{C}$  NMR (101 MHz,  $\text{DMSO-}d_6$ )  $\delta$  165.1, 159.4, 136.9, 135.2, 129.7, 127.5, 124.1, 119.9, 119.7, 111.2, 110.0, 55.3, 50.3, 39.5, 28.6 ppm.

***N*-(2,4,4-Trimethylpentan-2-yl)-2-phenyl-1*H*-indole-3-carboxamide (4g)**

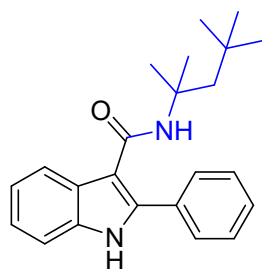

White solid (26 mg, 75%);  $^1\text{H}$  NMR (400 MHz,  $\text{DMSO-}d_6$ )  $\delta$  11.64 (s, 1H), 7.77 (d,  $J = 7.8$  Hz, 1H), 7.72 (d,  $J = 7.3$  Hz, 2H), 7.51 (t,  $J = 7.5$  Hz, 2H), 7.44 (d,  $J = 7.4$  Hz, 1H), 7.40 (d,  $J = 8.1$  Hz, 1H), 7.15 (t,  $J = 7.0$  Hz, 1H), 7.08 (t,  $J = 7.4$  Hz, 1H), 6.78 (s, 1H), 1.75 (s, 2H), 1.33 (s, 6H), 0.90 (s, 9H);  $^{13}\text{C}$  NMR (101 MHz,  $\text{DMSO-}d_6$ )  $\delta$  164.8, 135.4, 131.9, 128.7, 128.4, 122.0, 120.0, 111.3, 111.0, 54.2, 50.9, 39.5, 31.2, 28.9 ppm;  $\nu_{\text{max}}(\text{KBr})/\text{cm}^{-1}$  3698, 2956, 1723, 1629, 1514, 1450, 1222, 1002, 743, 695, 640, 487, HRMS-ESI (m/z): calcd for  $\text{C}_{23}\text{H}_{29}\text{N}_2\text{O}_1$ ,  $[\text{M}+\text{H}]^+$ : 349.2269, found 349.2274.

## 5. Reference

1. X. Li, R. Van Zeeland, R. V. Maligal-Ganesh, Y. Pei, G. Power, L. Stanley and W. Huang, *ACS Catal.*, 2016, **6**, 6324.
2. M. Li, J. Zheng, W. Hu, C. Li, J. Li, S. Fang, H. Jiang and W. Wu, *Org. Lett.*, 2018, **20**, 7245.
3. Z. Hu, D. Liang, J. Zhao, J. Huang and Q. Zhu, *Chem. Commun.*, 2012, **48**, 7371.

## 6. Copies of $^1\text{H}$ , $^{13}\text{C}$ and $^{19}\text{F}$ NMR Spectra

$^1\text{H}$  NMR of **3a**

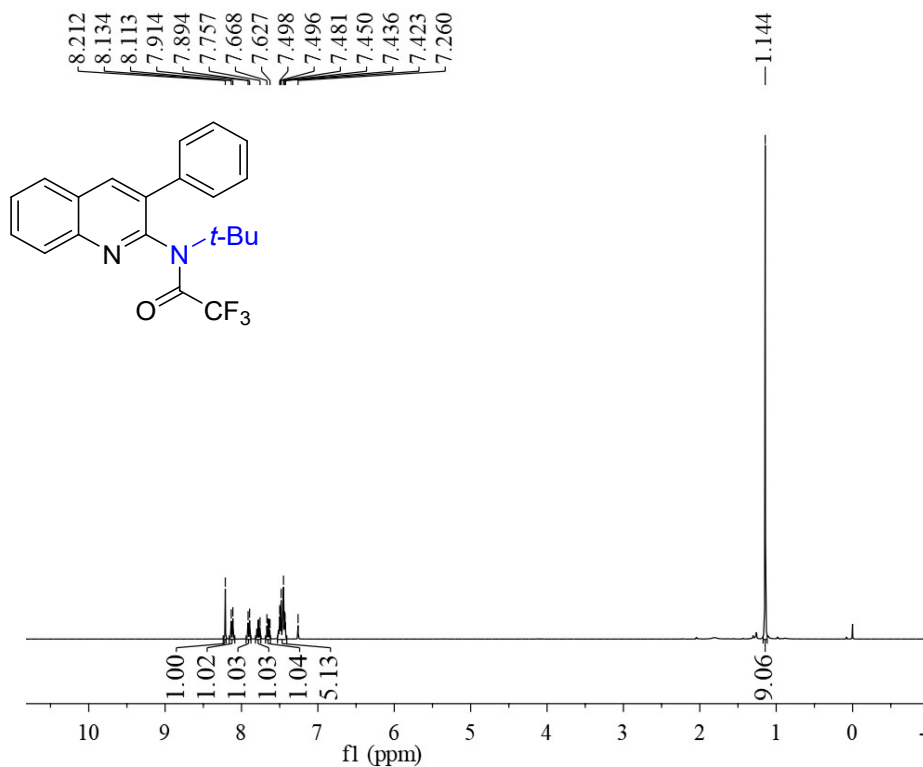

$^{13}\text{C}$  NMR of **3a**

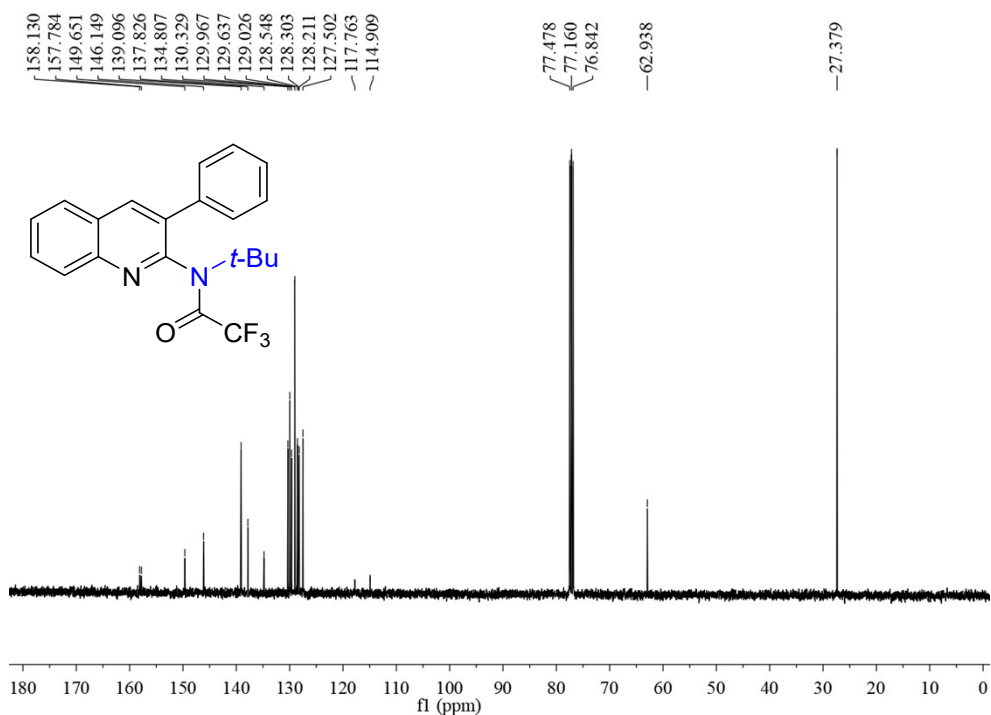



<sup>19</sup>F NMR of **3a**

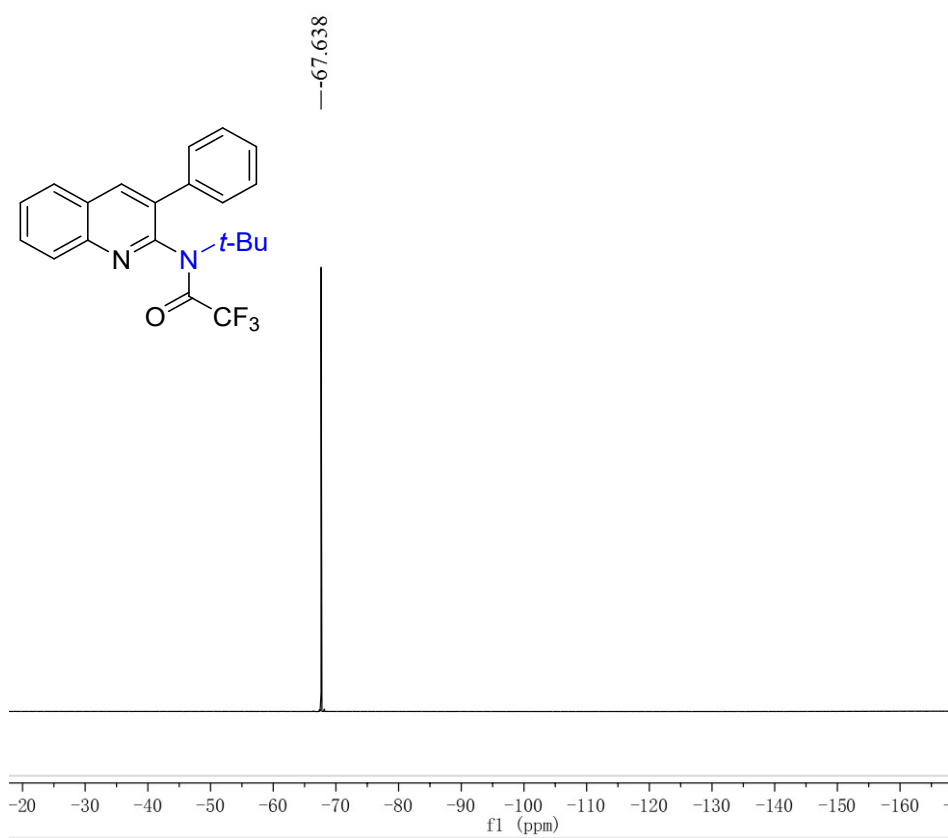

### <sup>1</sup>H NMR of **3b**

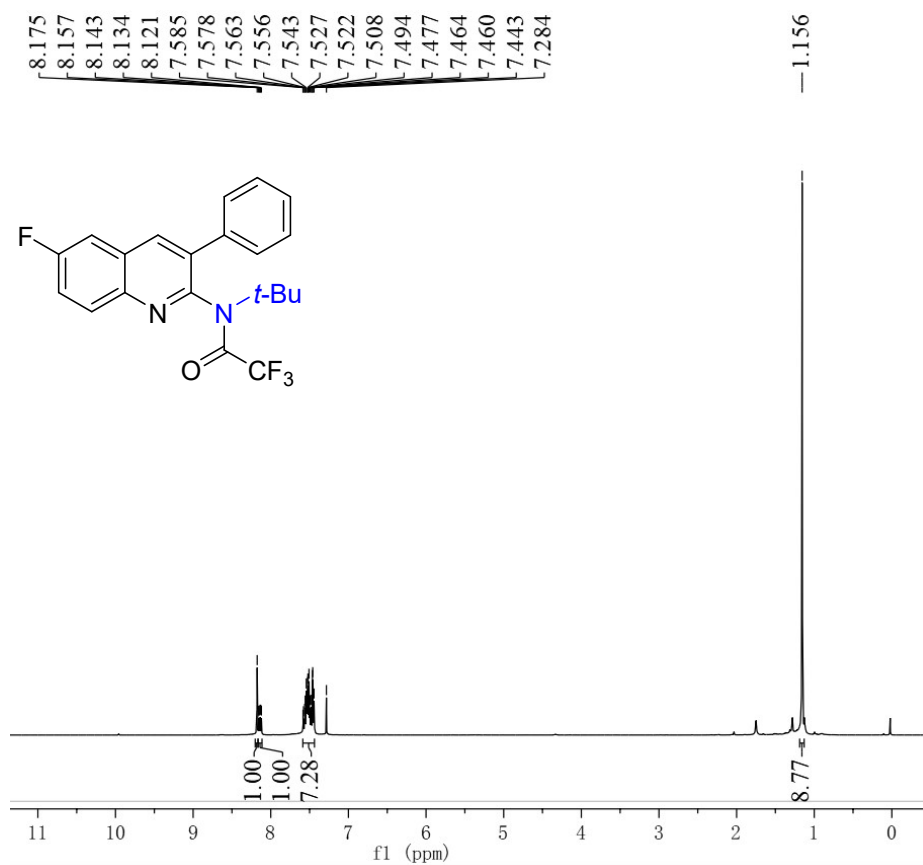

### <sup>13</sup>C NMR of **3b**

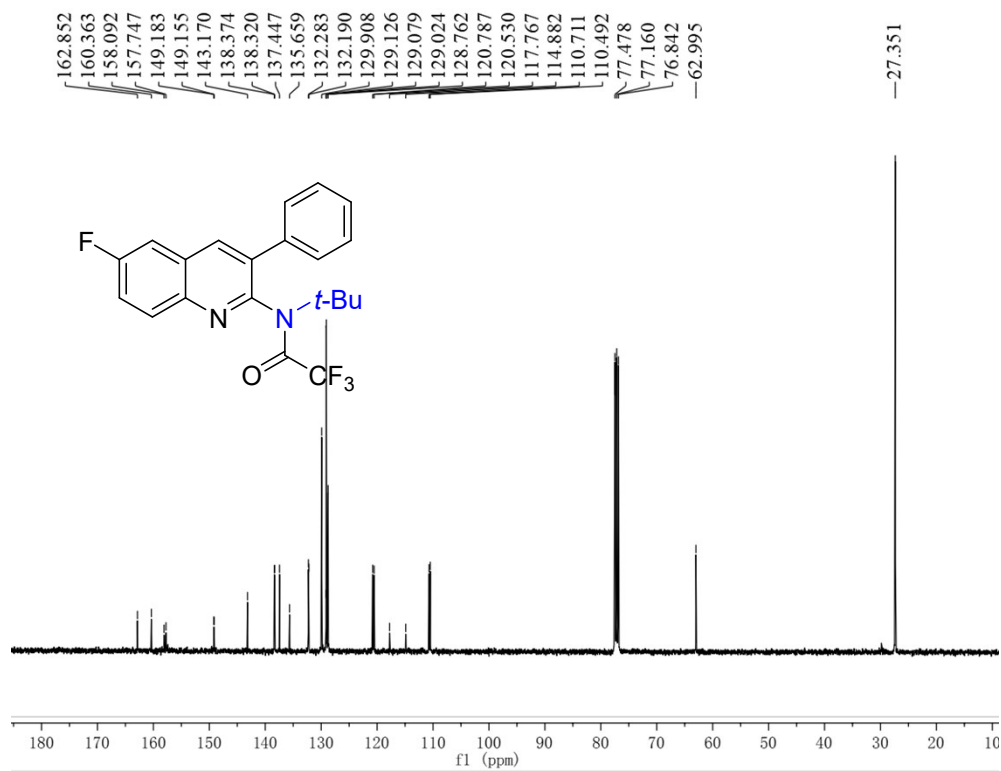

<sup>19</sup>F NMR of **3b**

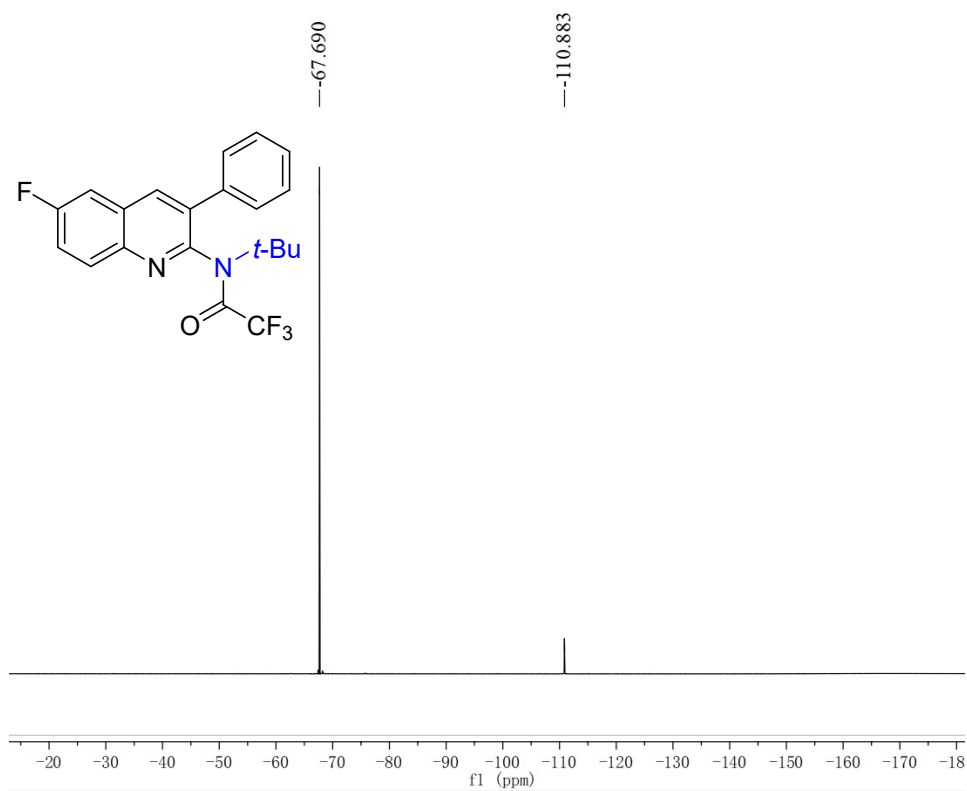

### <sup>1</sup>H NMR of 3c

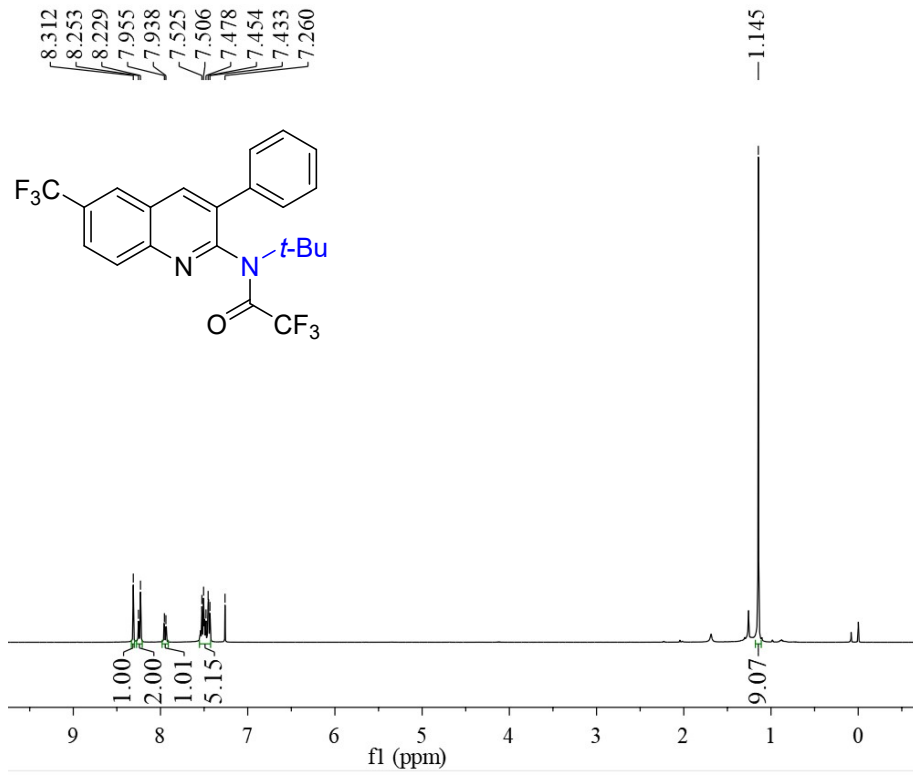

### <sup>13</sup>C NMR of 3c

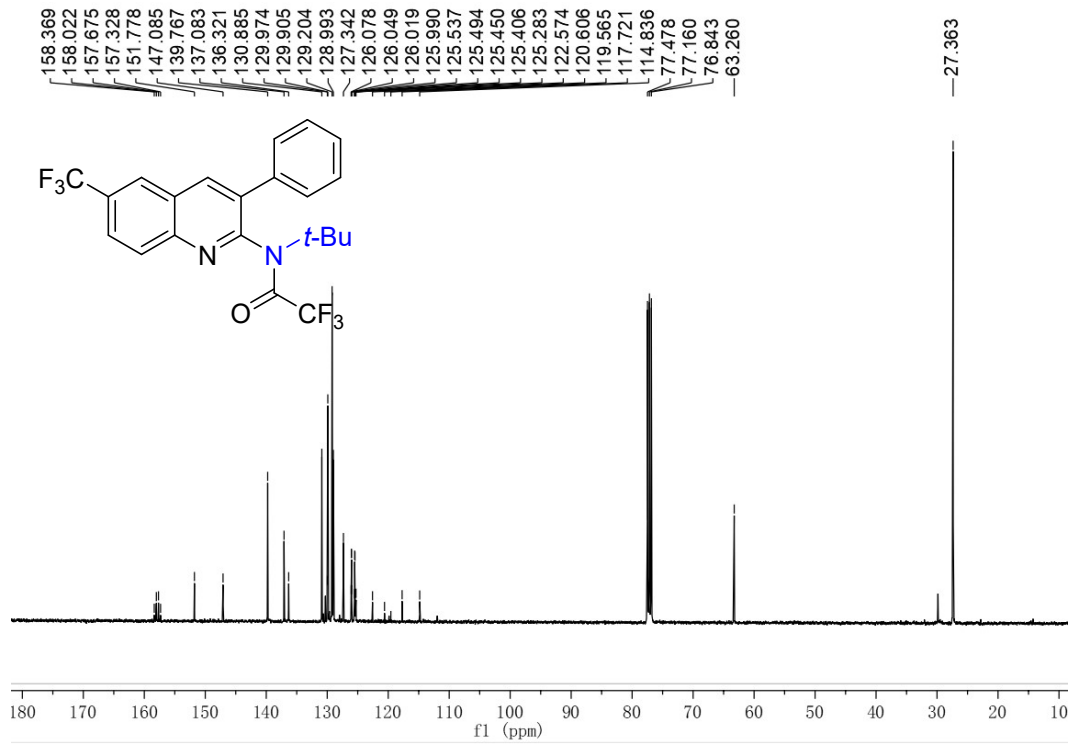

<sup>19</sup>F NMR of **3c**

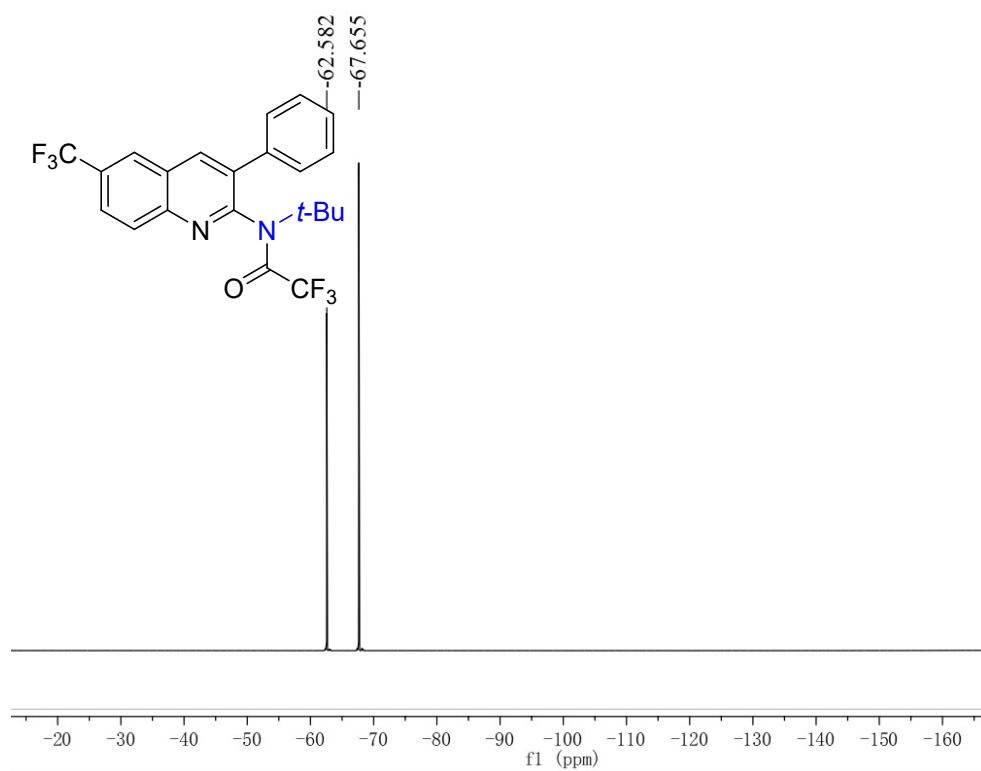

### <sup>1</sup>H NMR of 3d

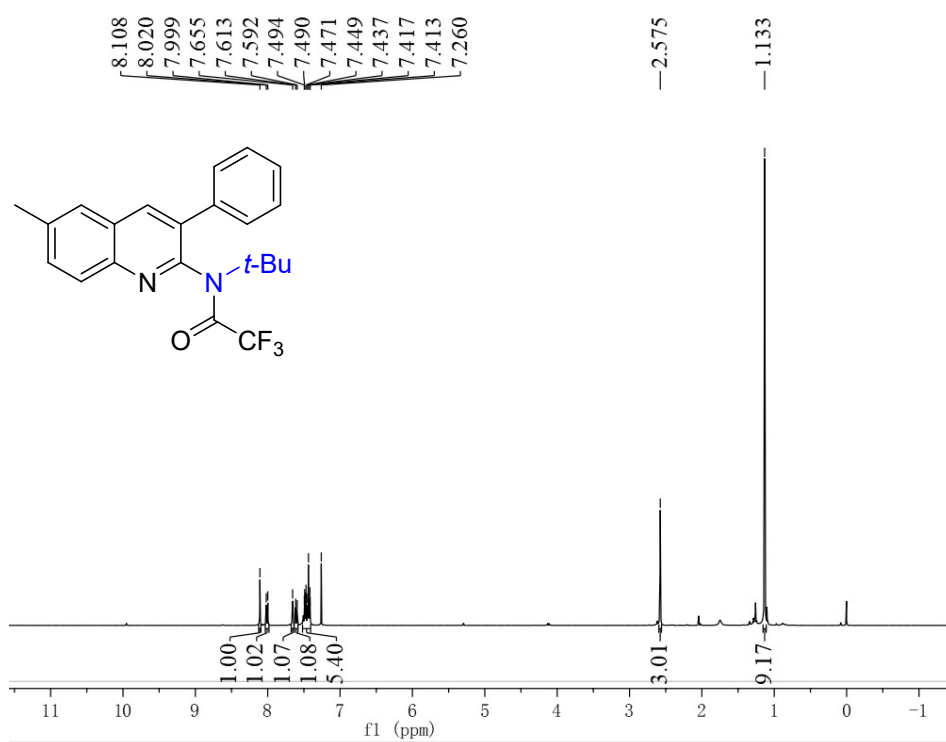

### <sup>13</sup>C NMR of 3d

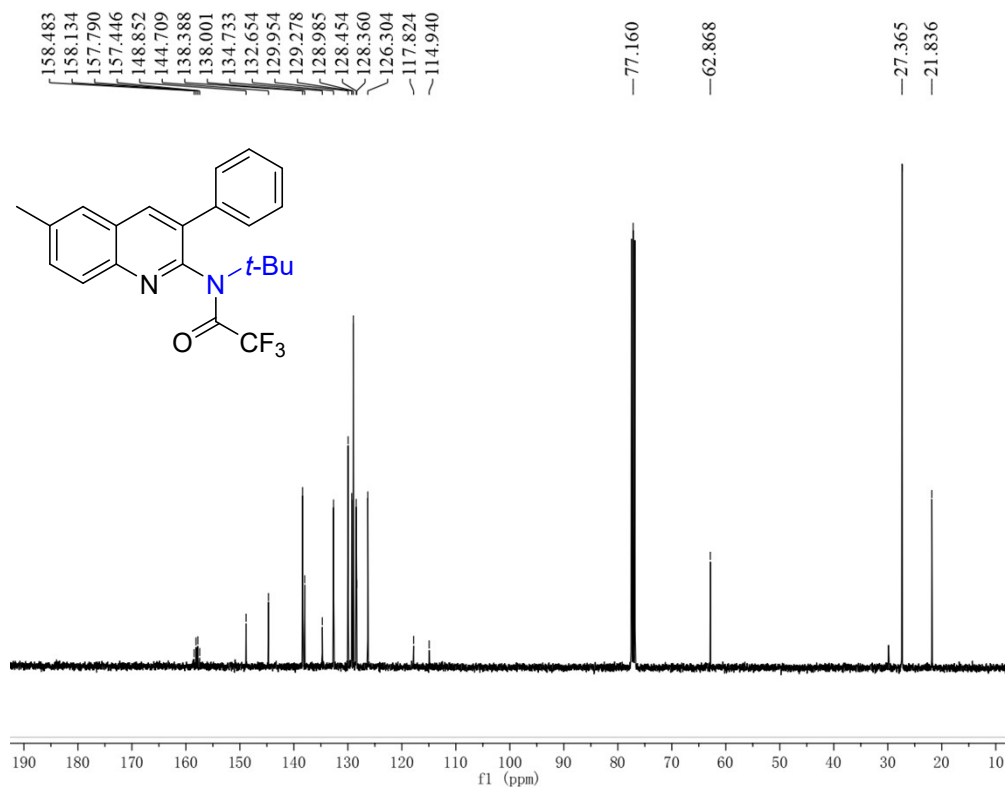

<sup>19</sup>F NMR of **3d**

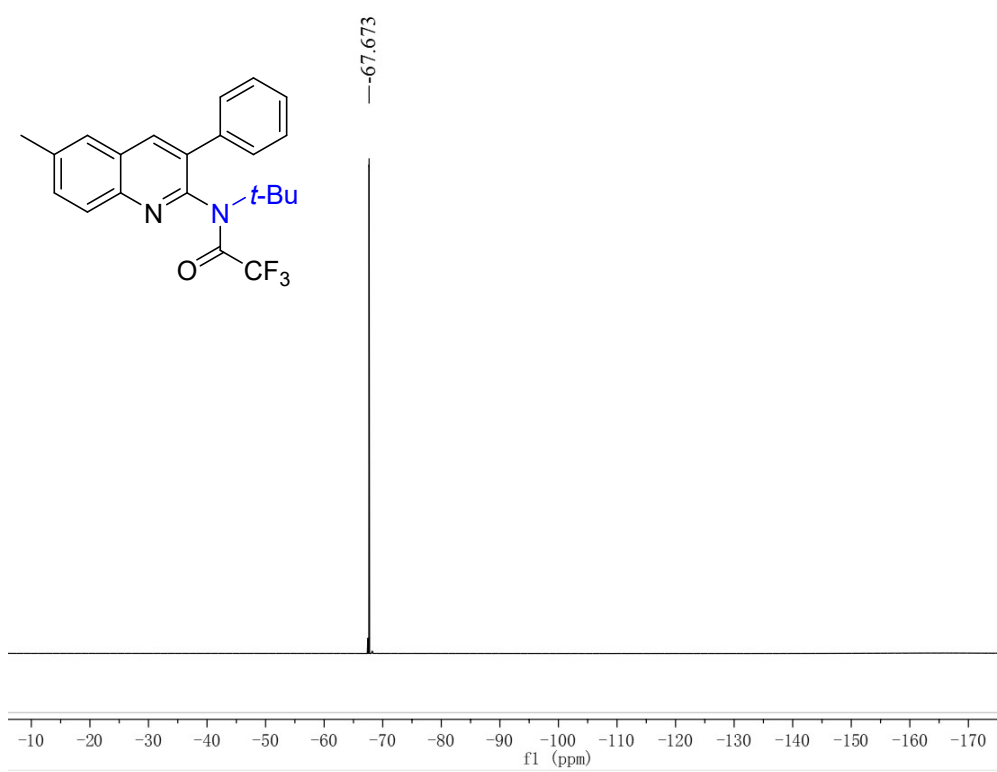

### <sup>1</sup>H NMR of 3e

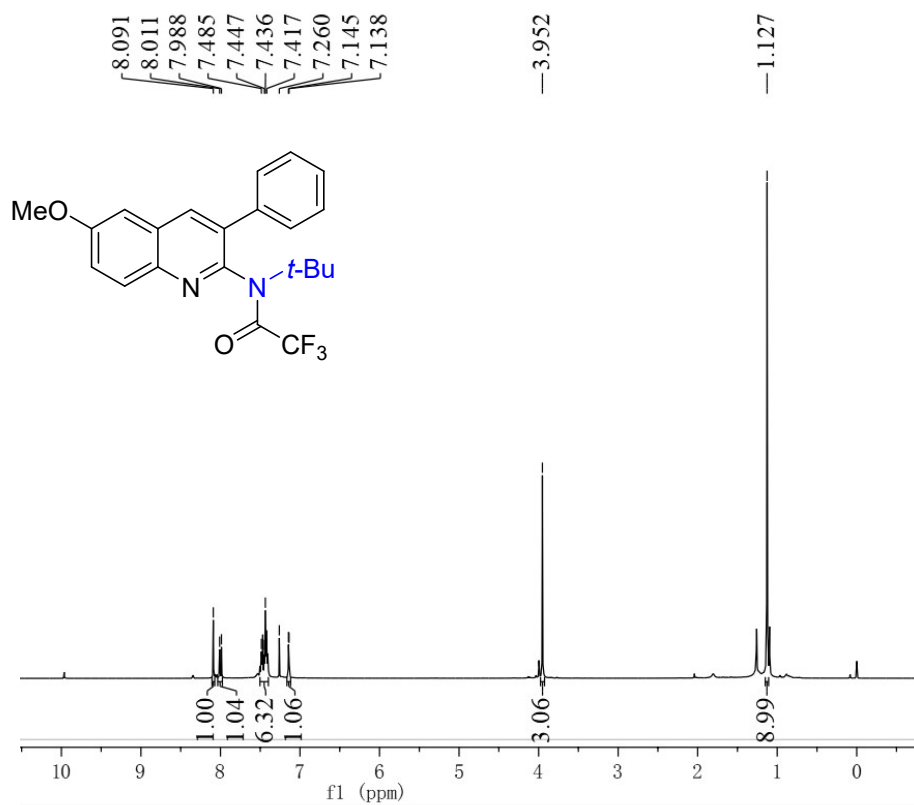

### <sup>13</sup>C NMR of 3e

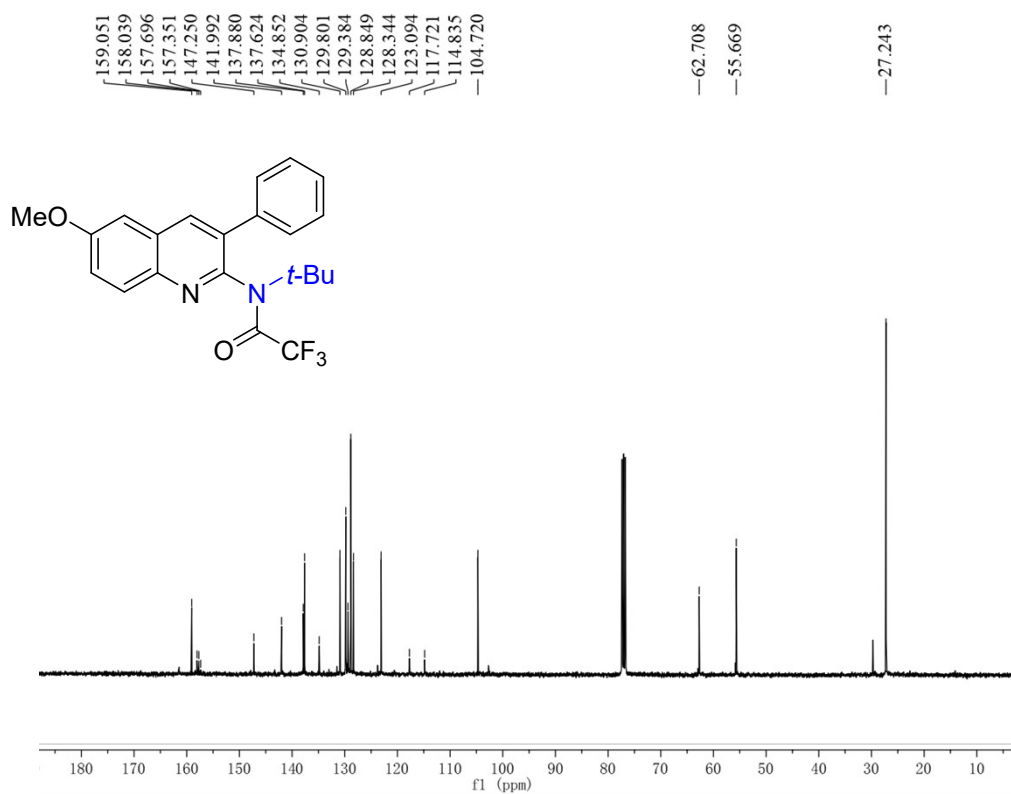



<sup>19</sup>F NMR of **3e**

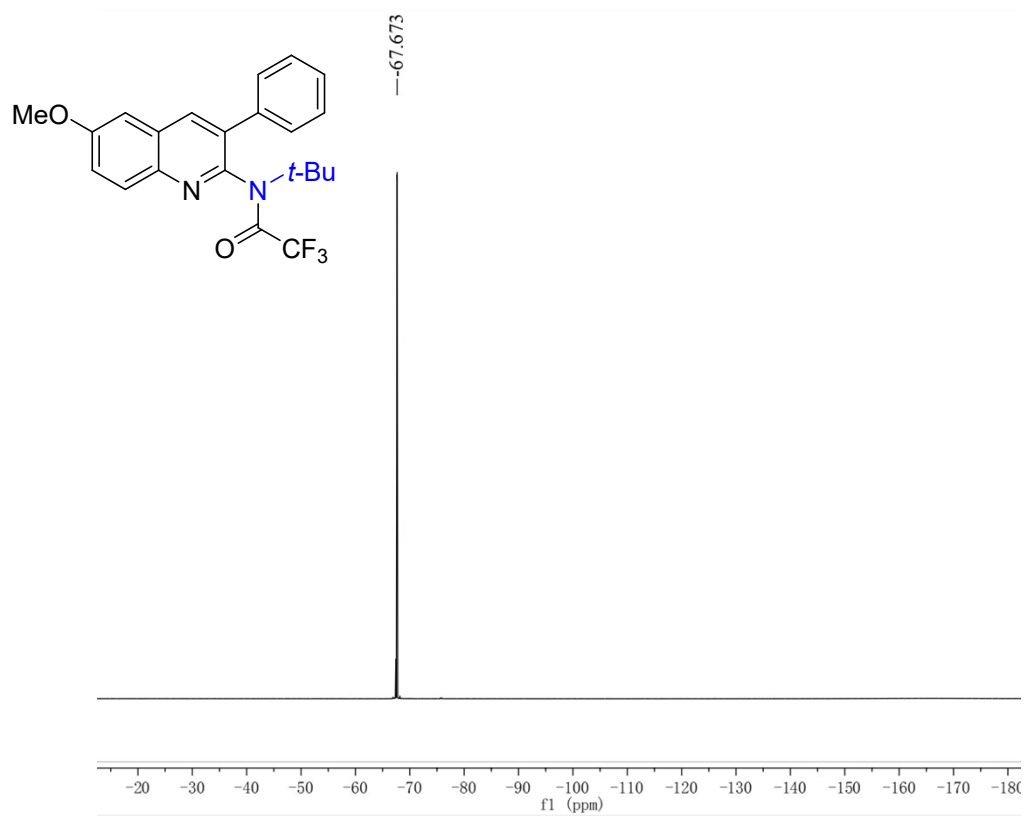

### <sup>1</sup>H NMR of 3f

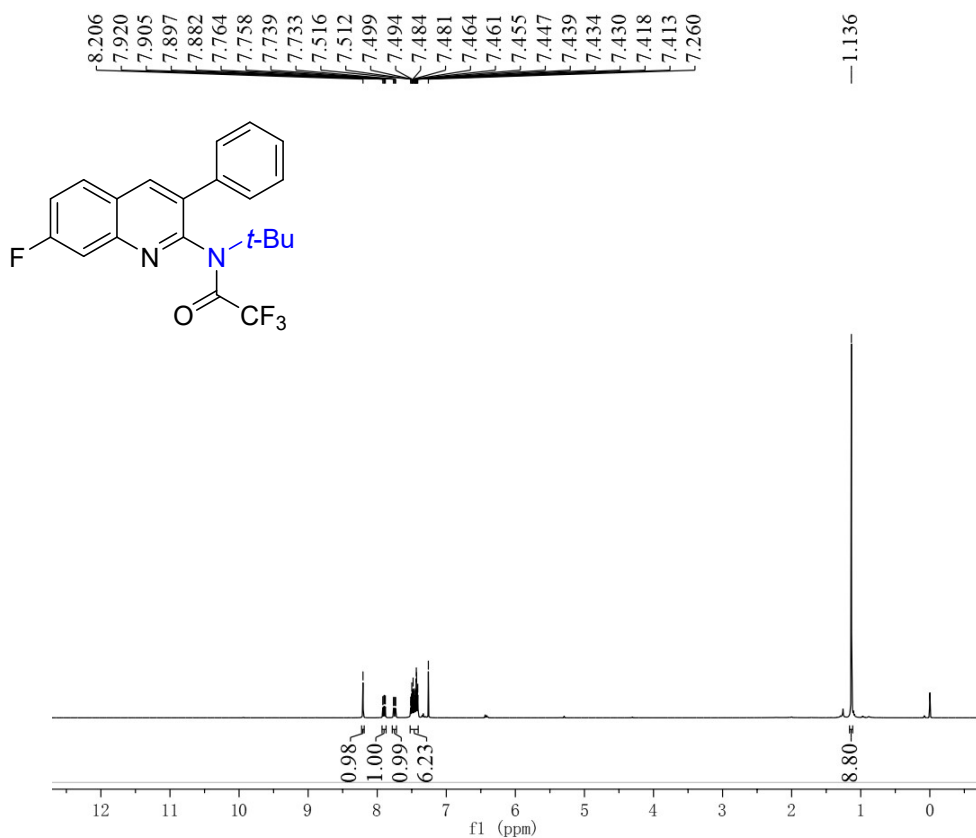

### <sup>13</sup>C NMR of 3f

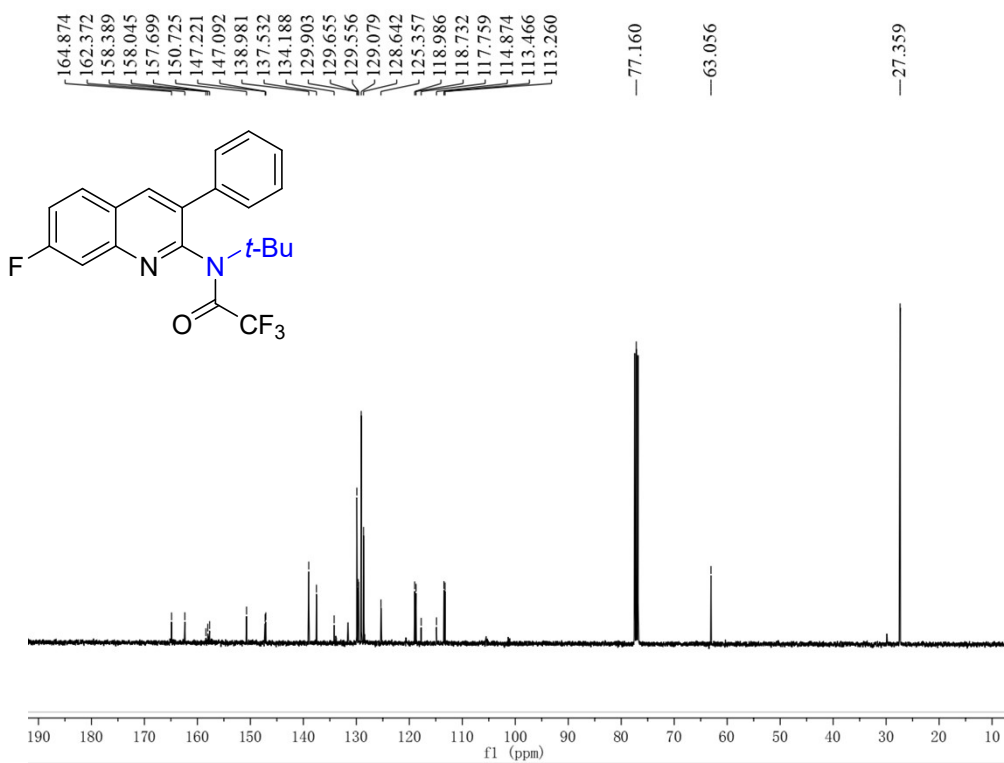

<sup>19</sup>F NMR of **3f**

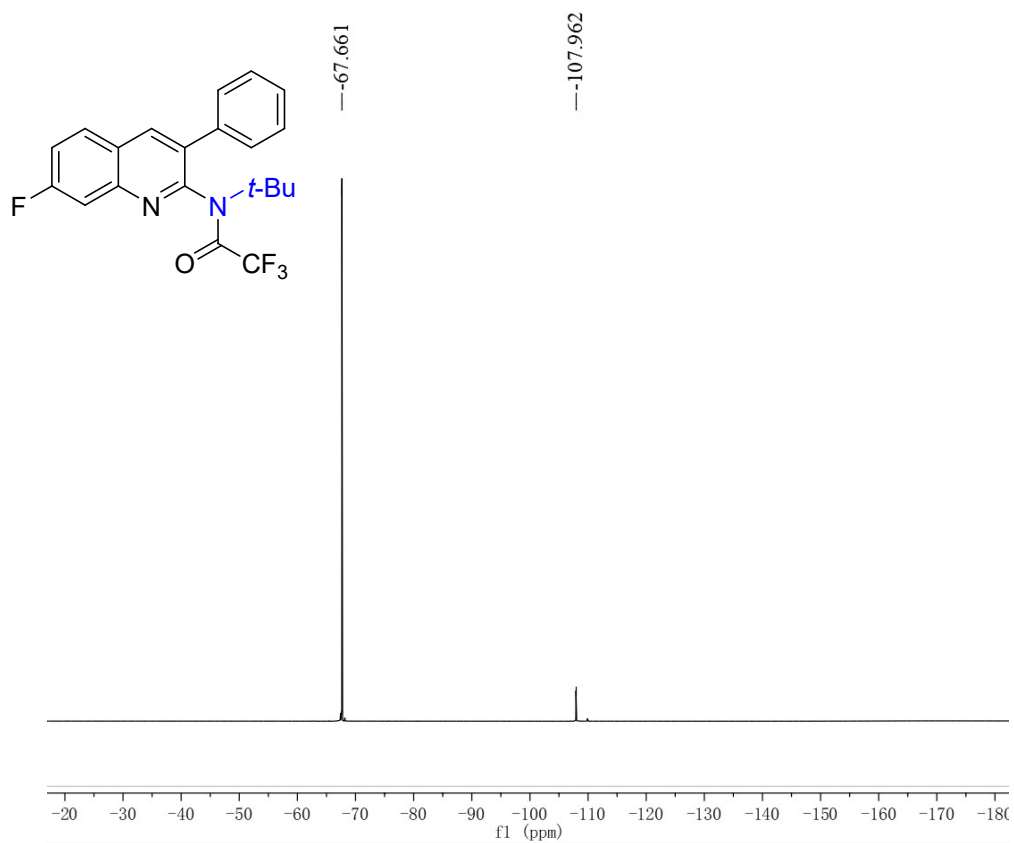

### <sup>1</sup>H NMR of **3g**

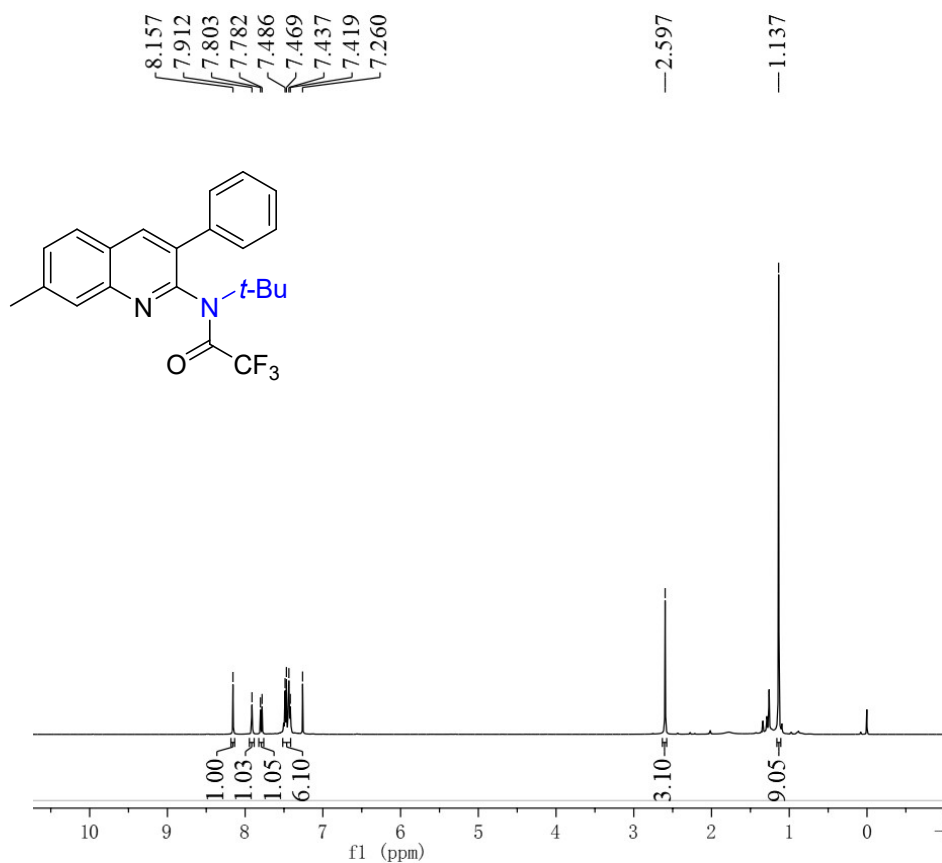

### <sup>13</sup>C NMR of **3g**

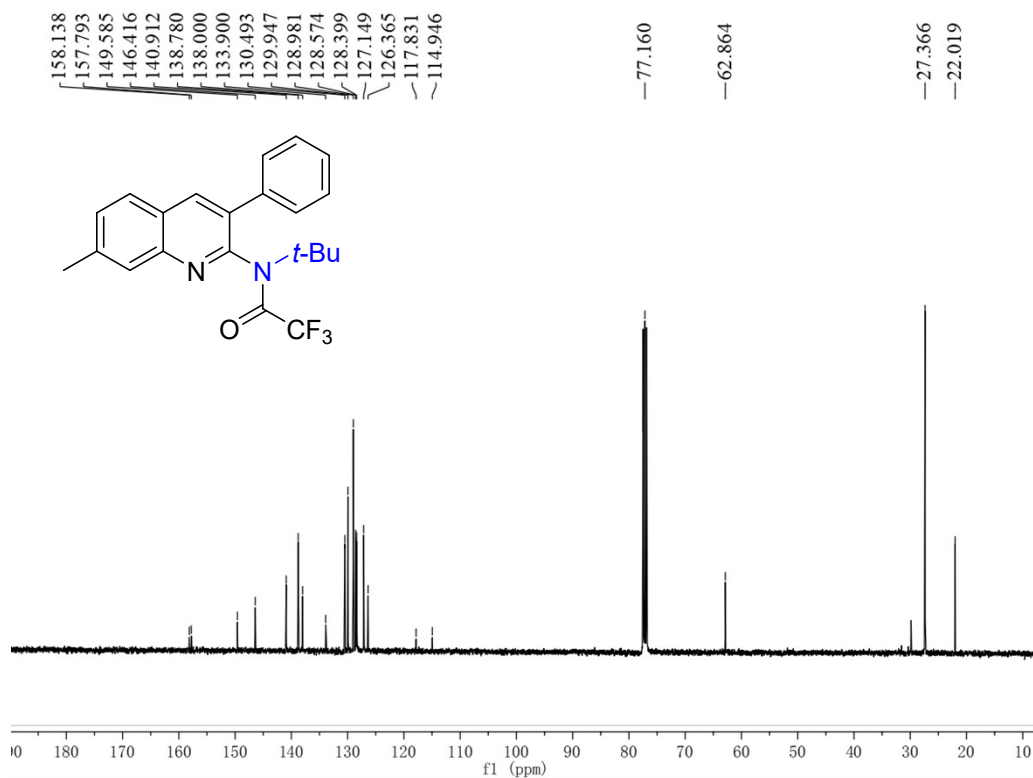

$^{19}\text{F}$  NMR of **3g**

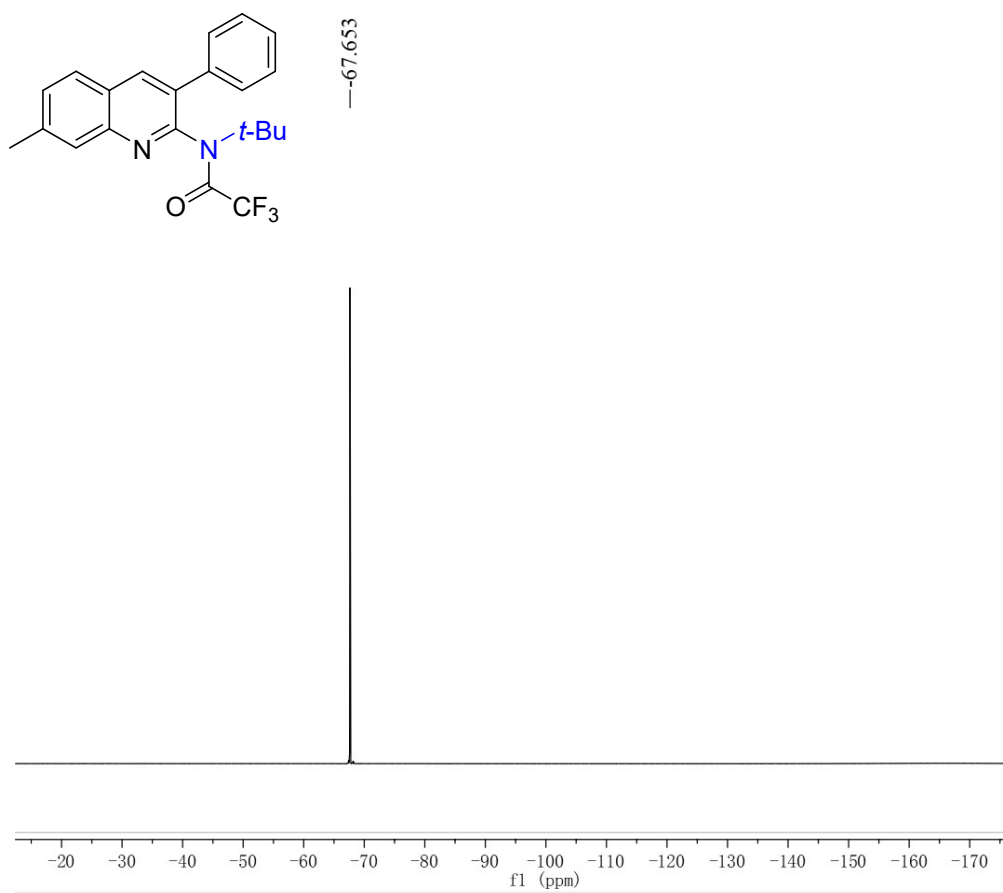

### <sup>1</sup>H NMR of 3h

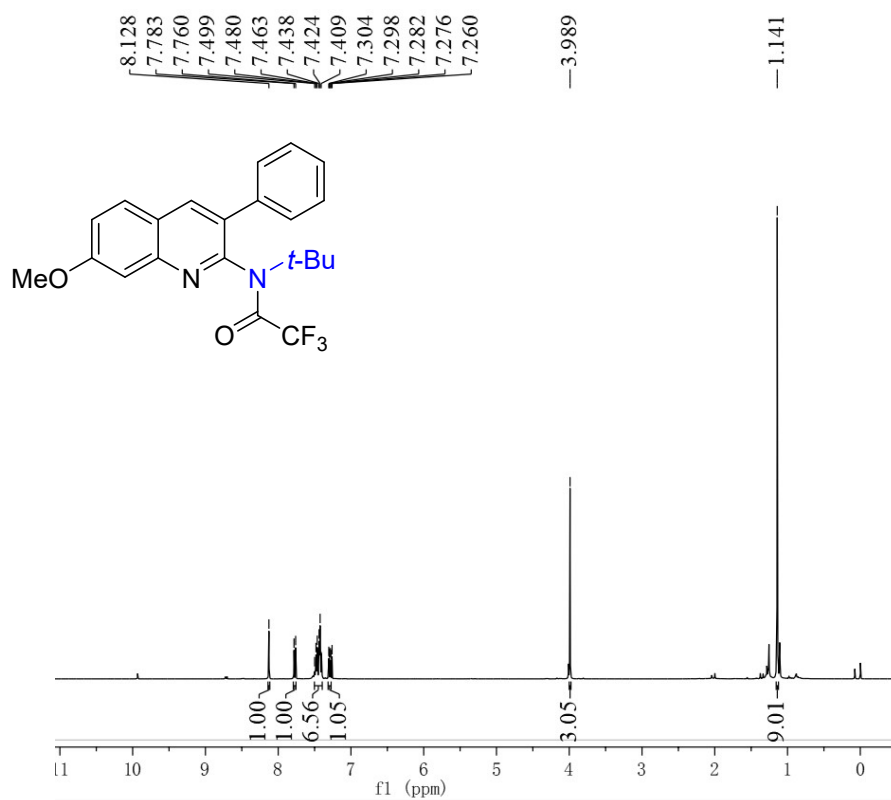

### <sup>13</sup>C NMR of 3h

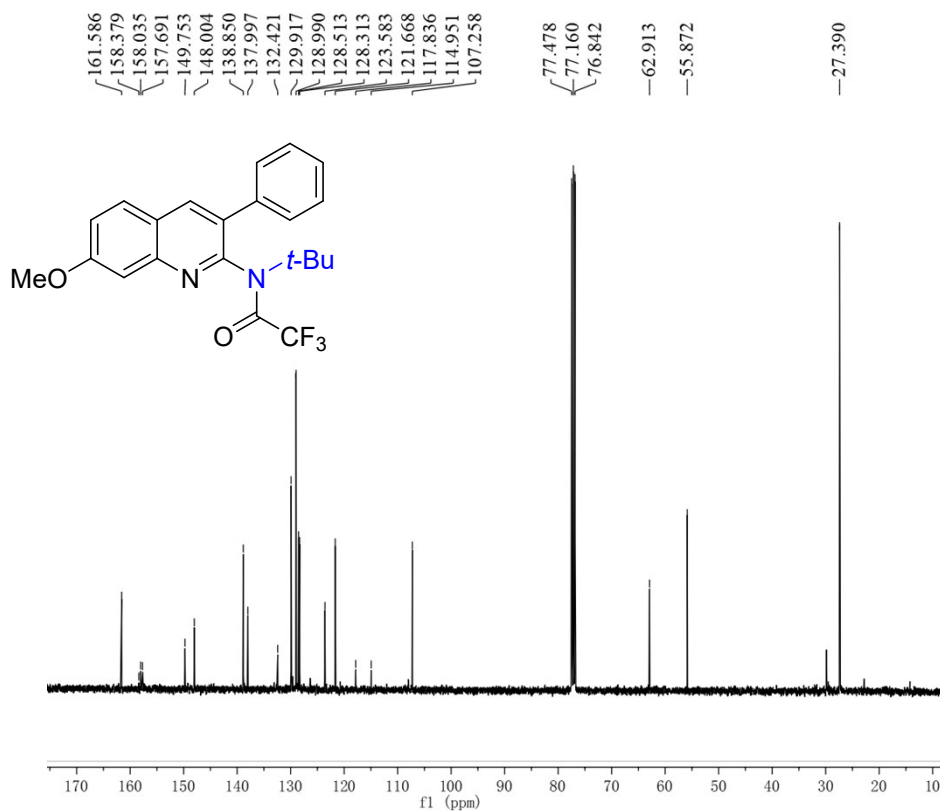

<sup>19</sup>F NMR of **3h**

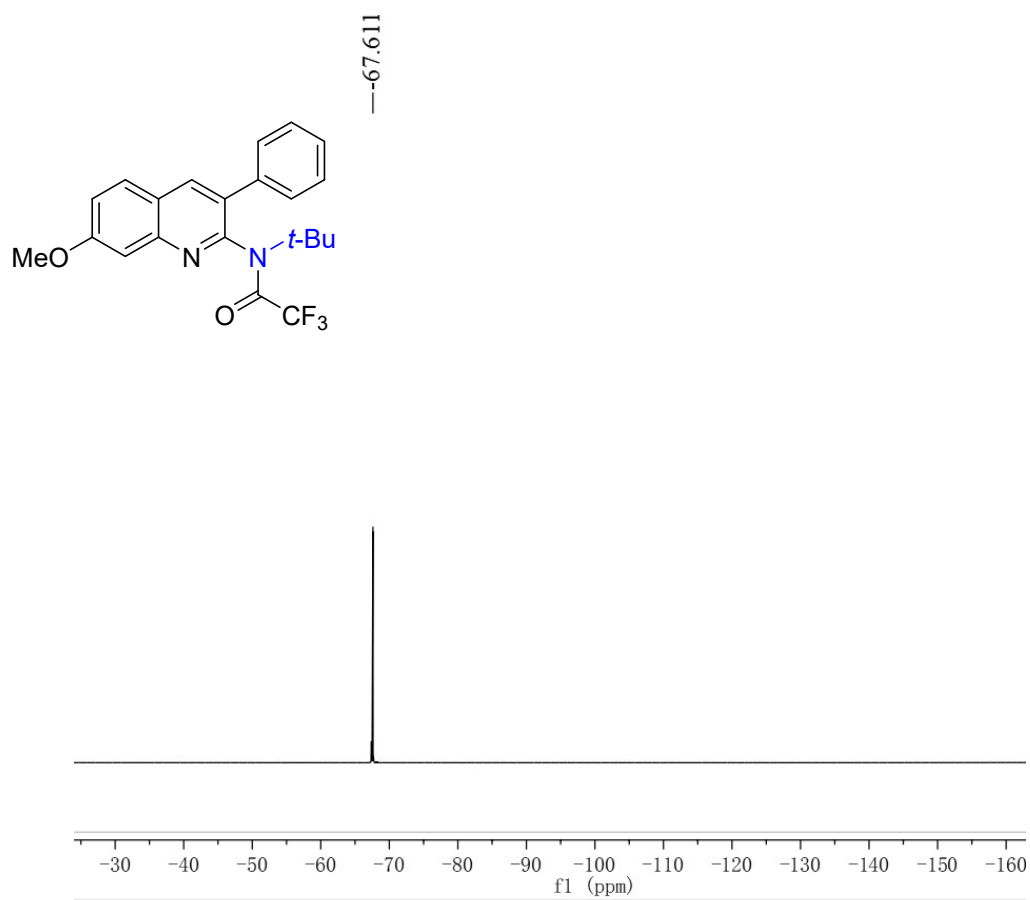

### <sup>1</sup>H NMR of **3i**

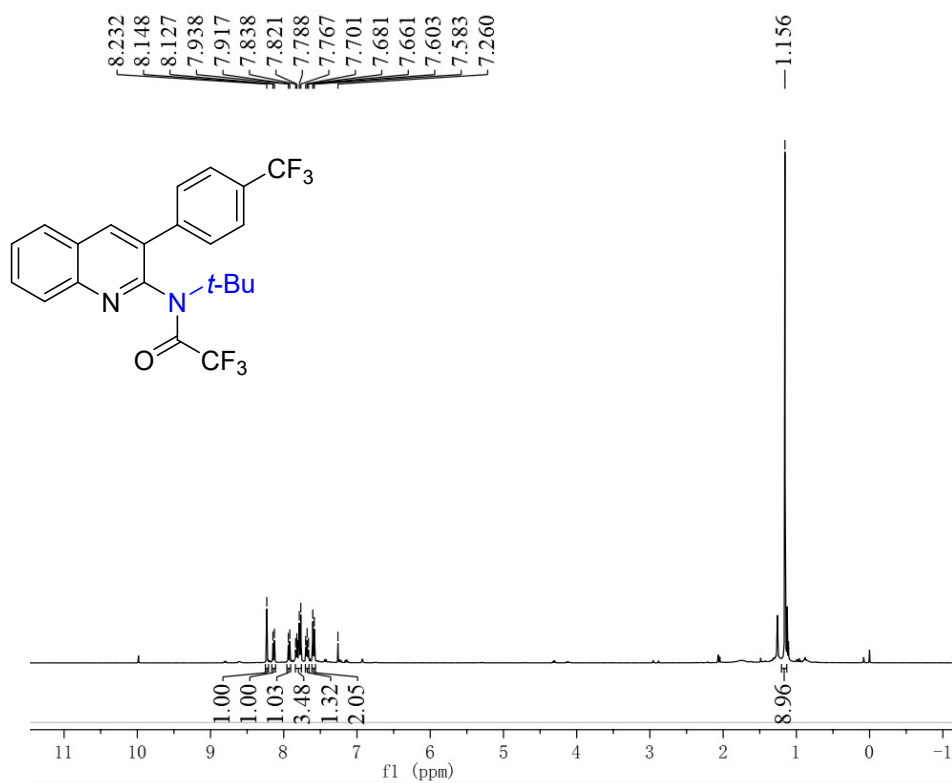

### <sup>13</sup>C NMR of **3i**

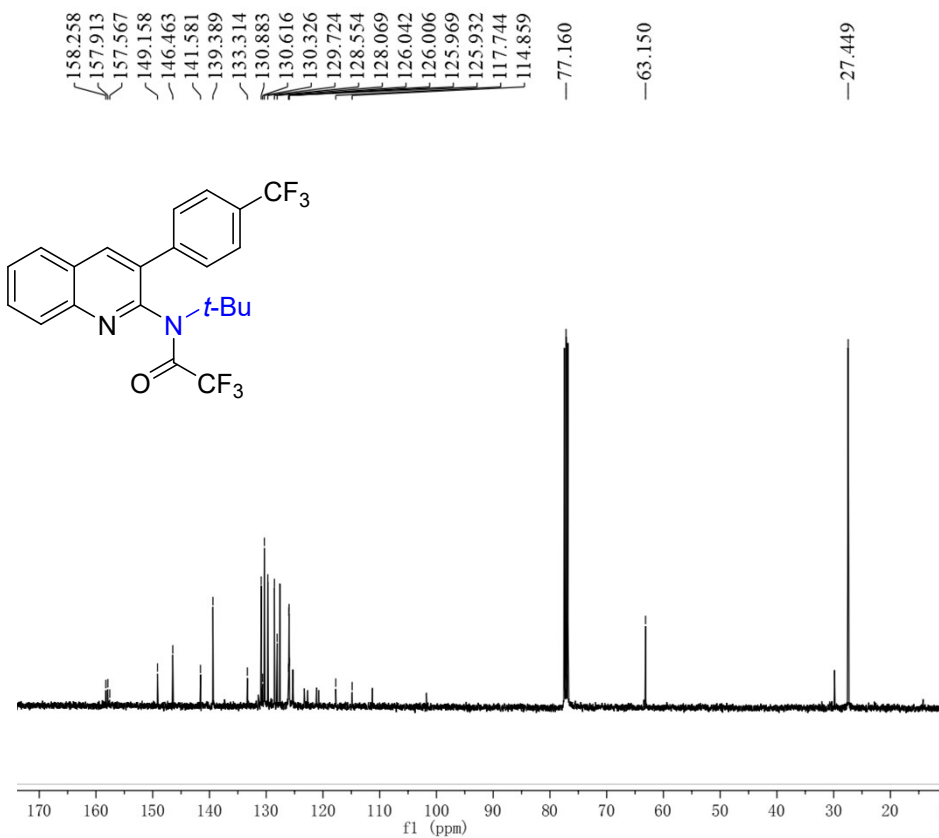



<sup>19</sup>F NMR of **3i**

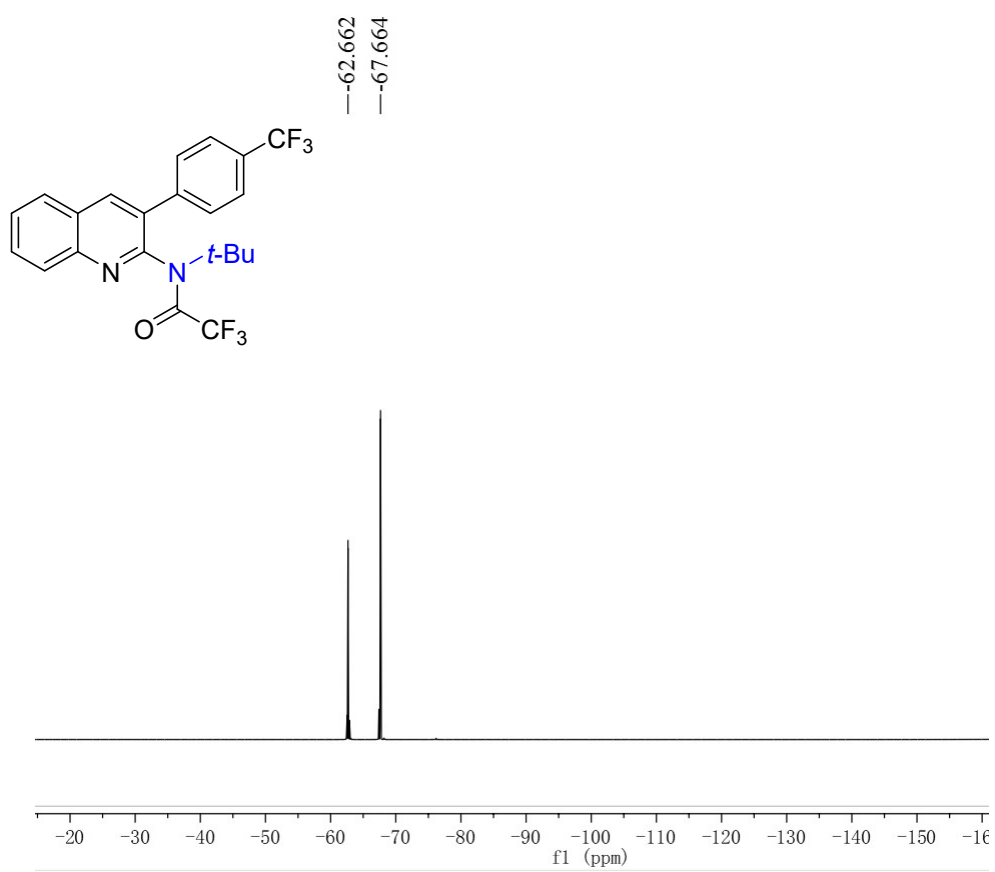

### <sup>1</sup>H NMR of **3j**

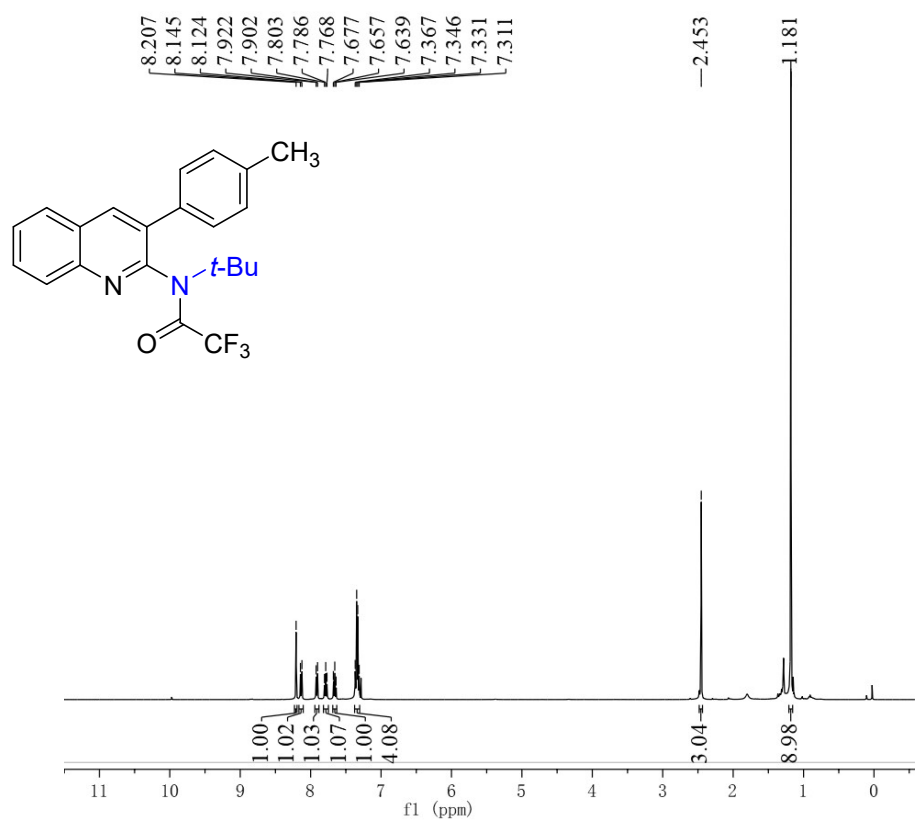

### <sup>13</sup>C NMR of **3j**

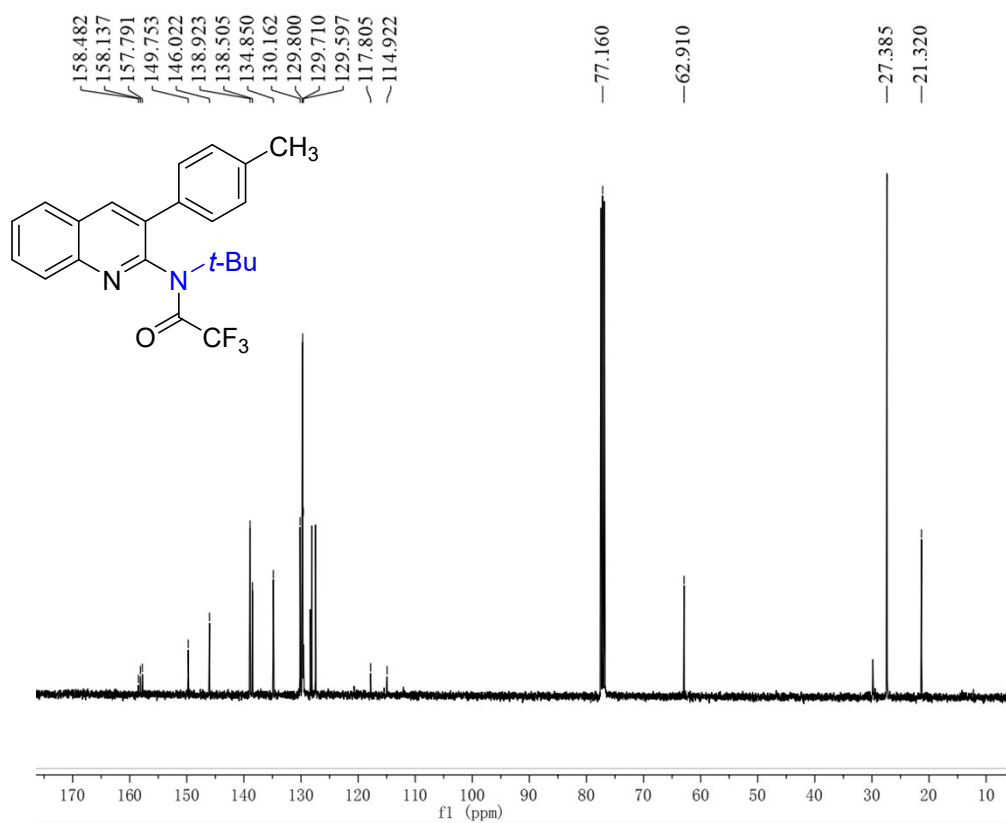

<sup>19</sup>F NMR of **3j**

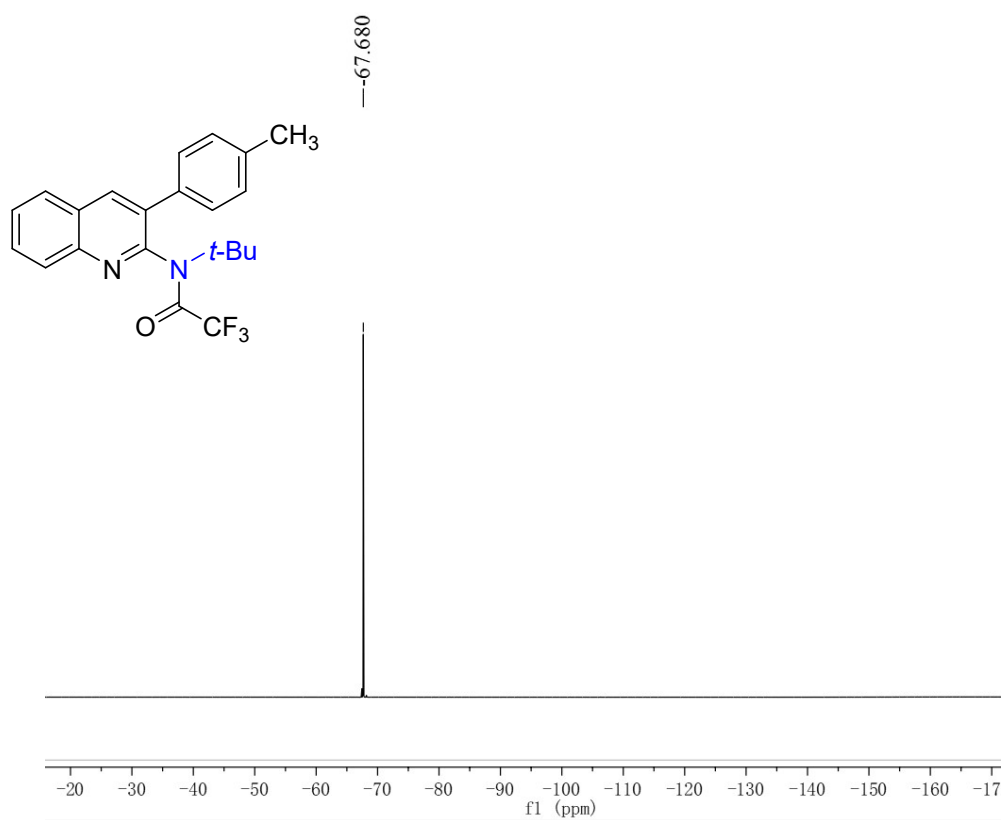

### <sup>1</sup>H NMR of **3k**

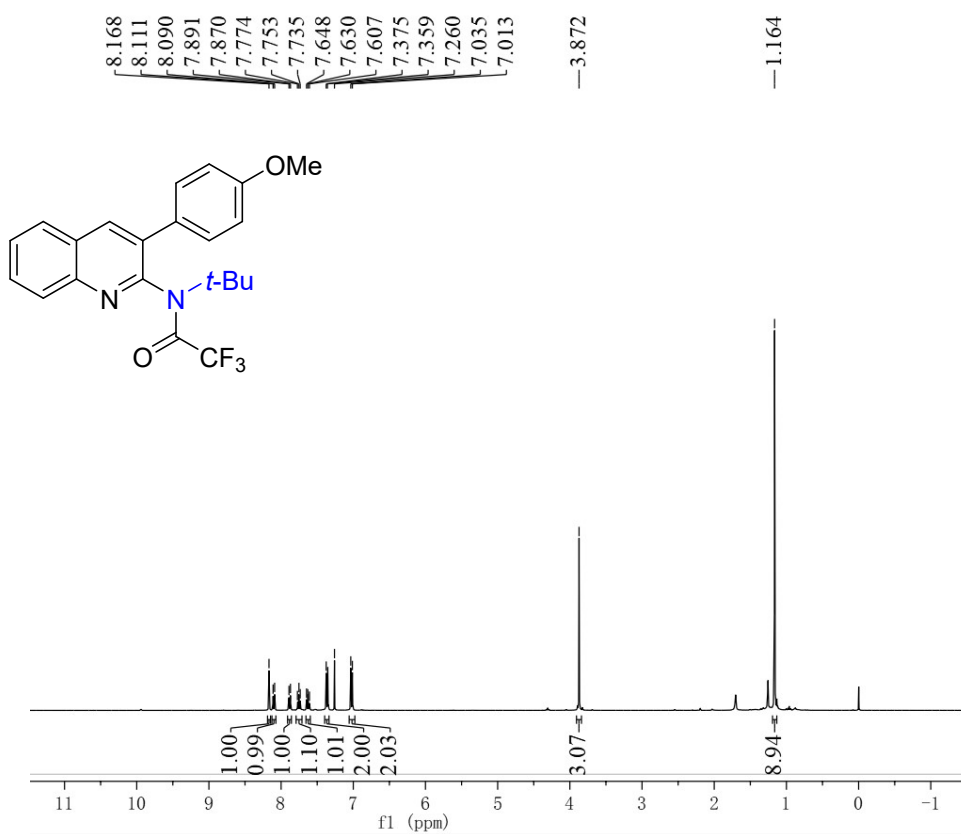

### <sup>13</sup>C NMR of **3k**

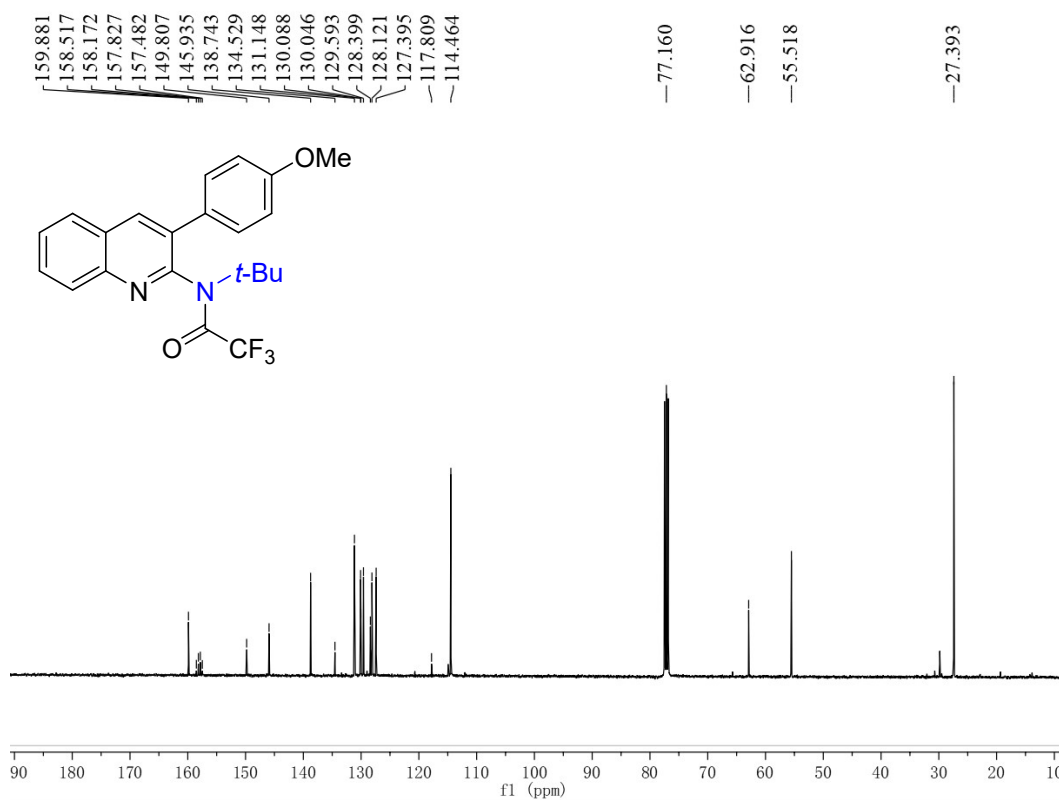

<sup>19</sup>F NMR of **3k**

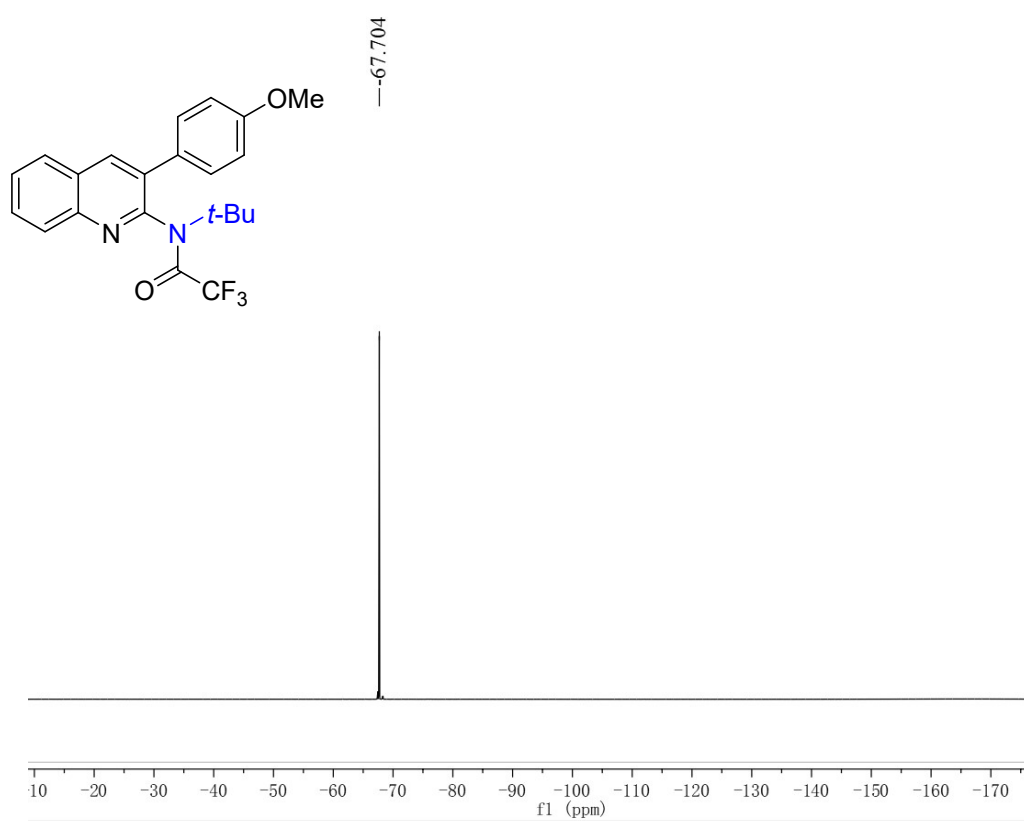

### <sup>1</sup>H NMR of 3I

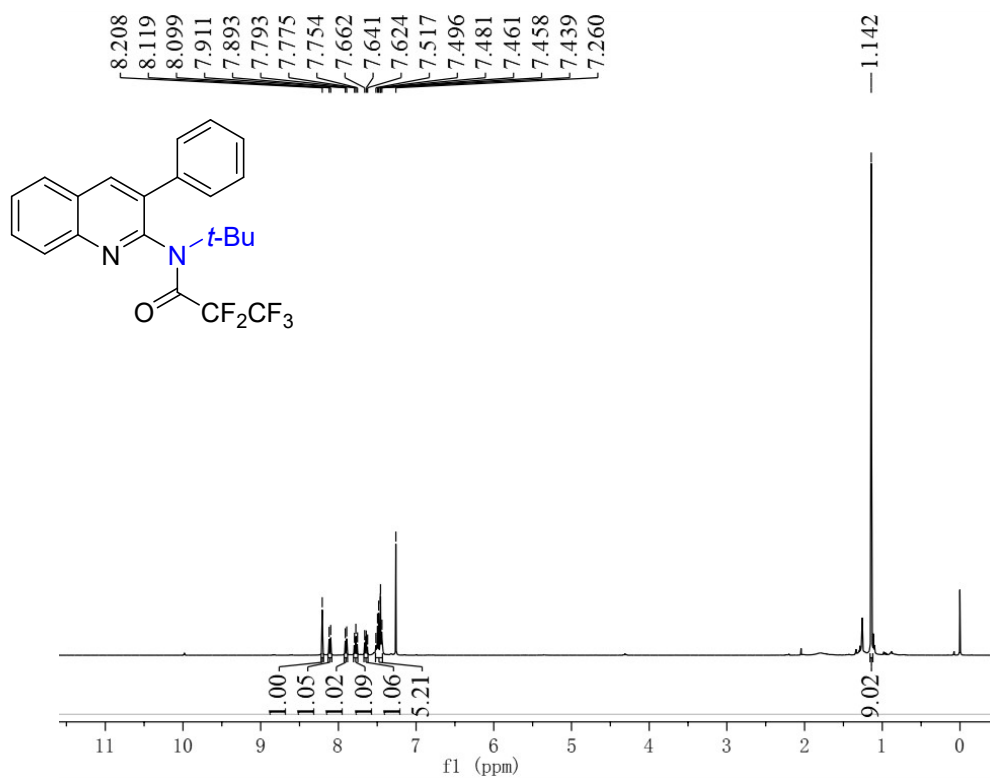

### <sup>13</sup>C NMR of 3I

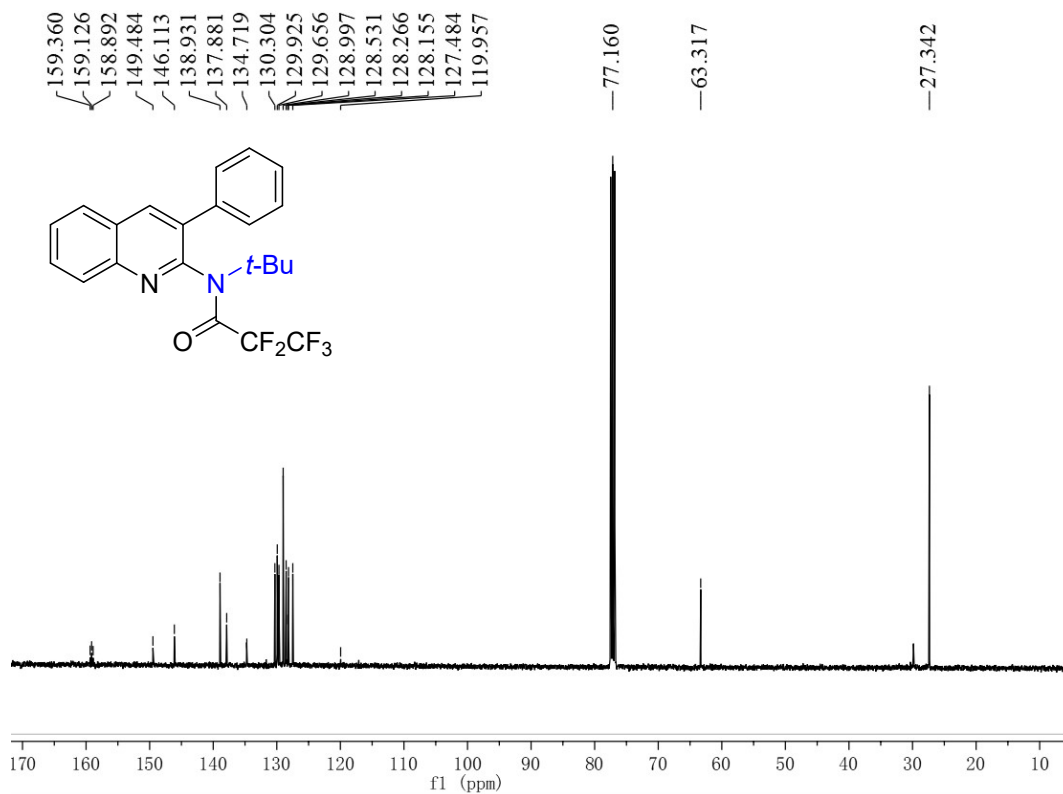

<sup>19</sup>F NMR of **31**

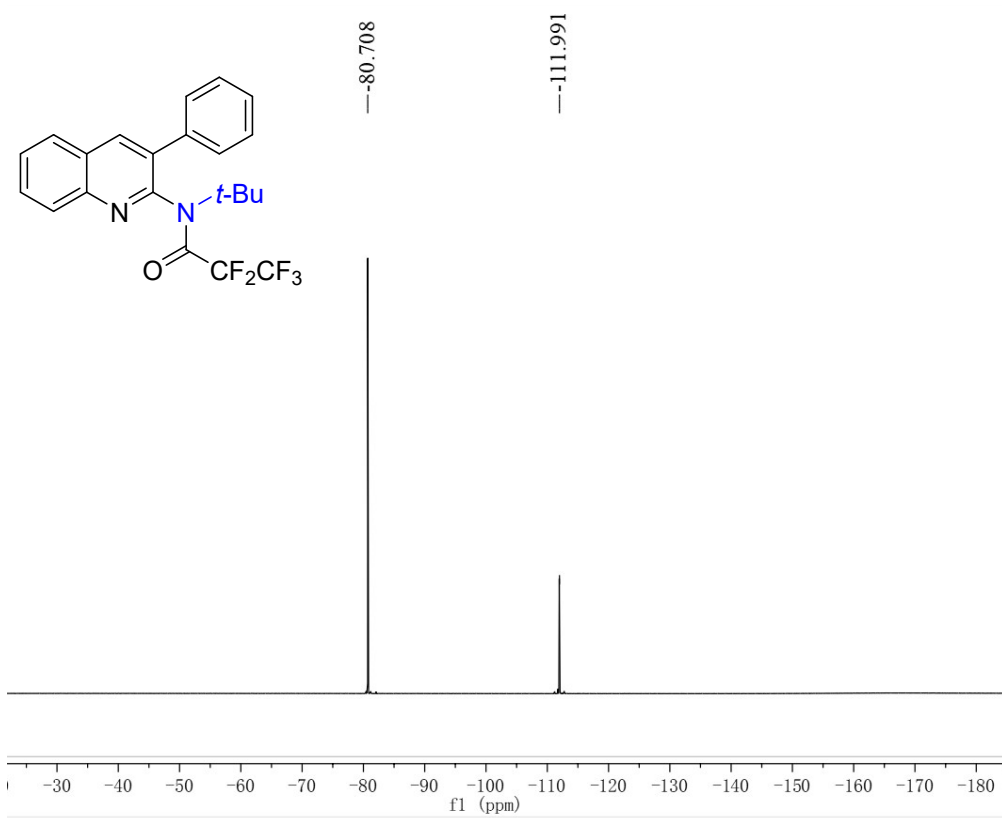

### <sup>1</sup>H NMR of 3m

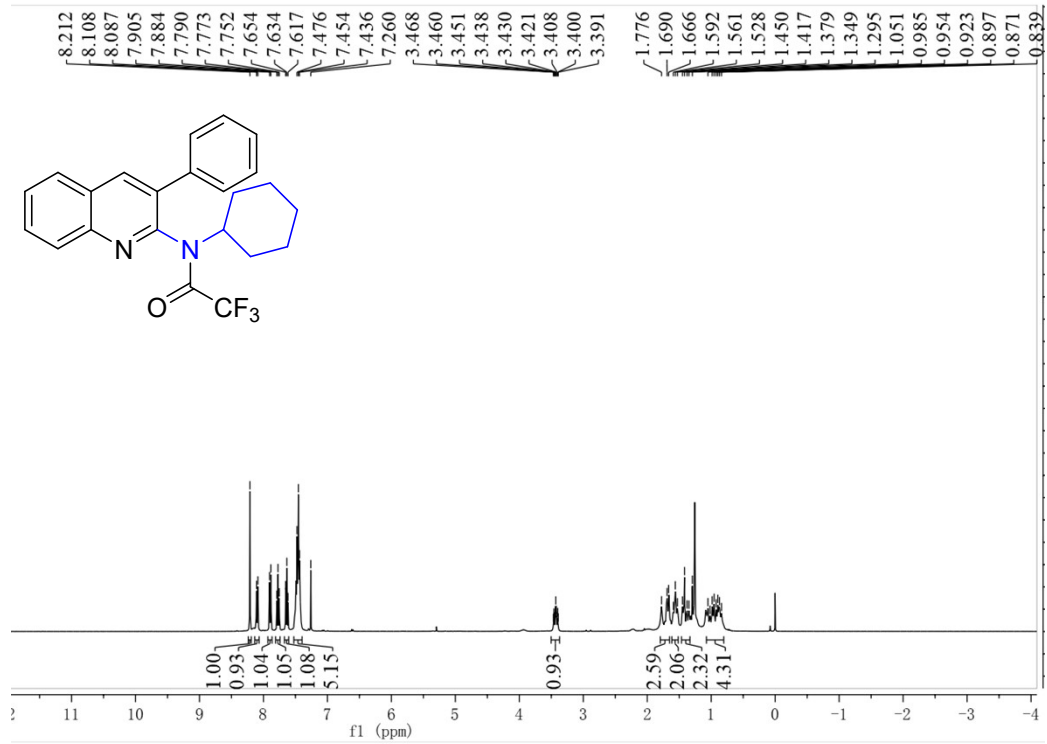

### <sup>13</sup>C NMR of 3m

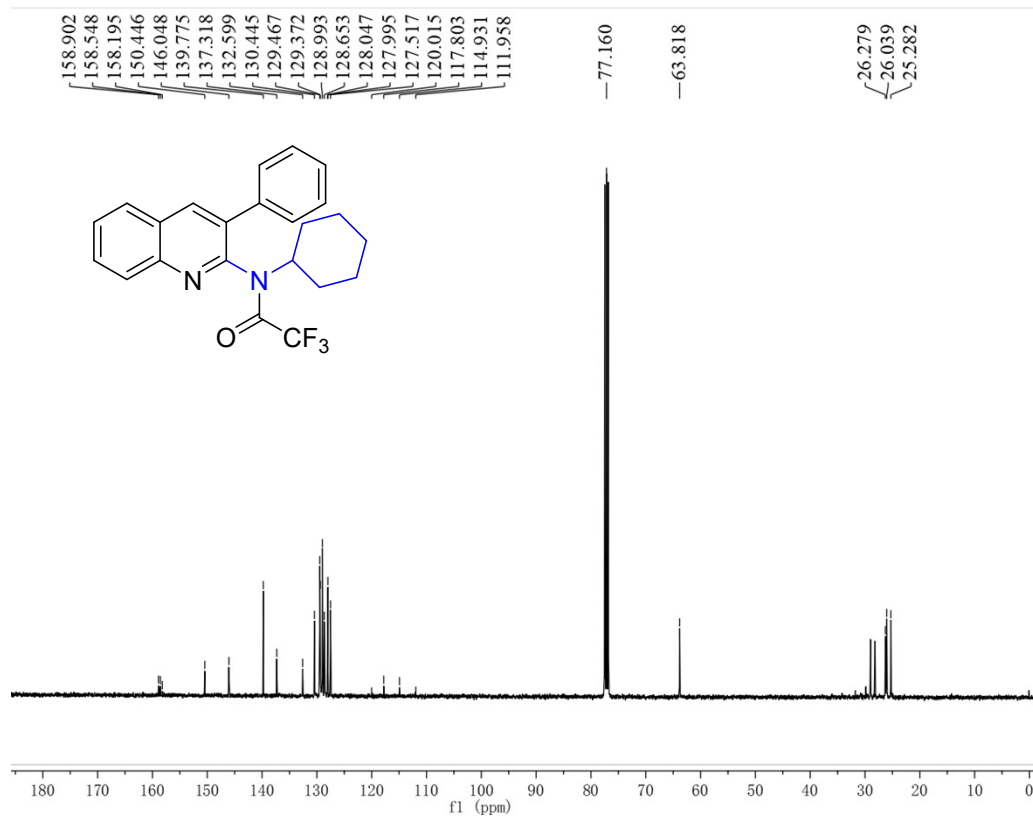



<sup>19</sup>F NMR of **3m**

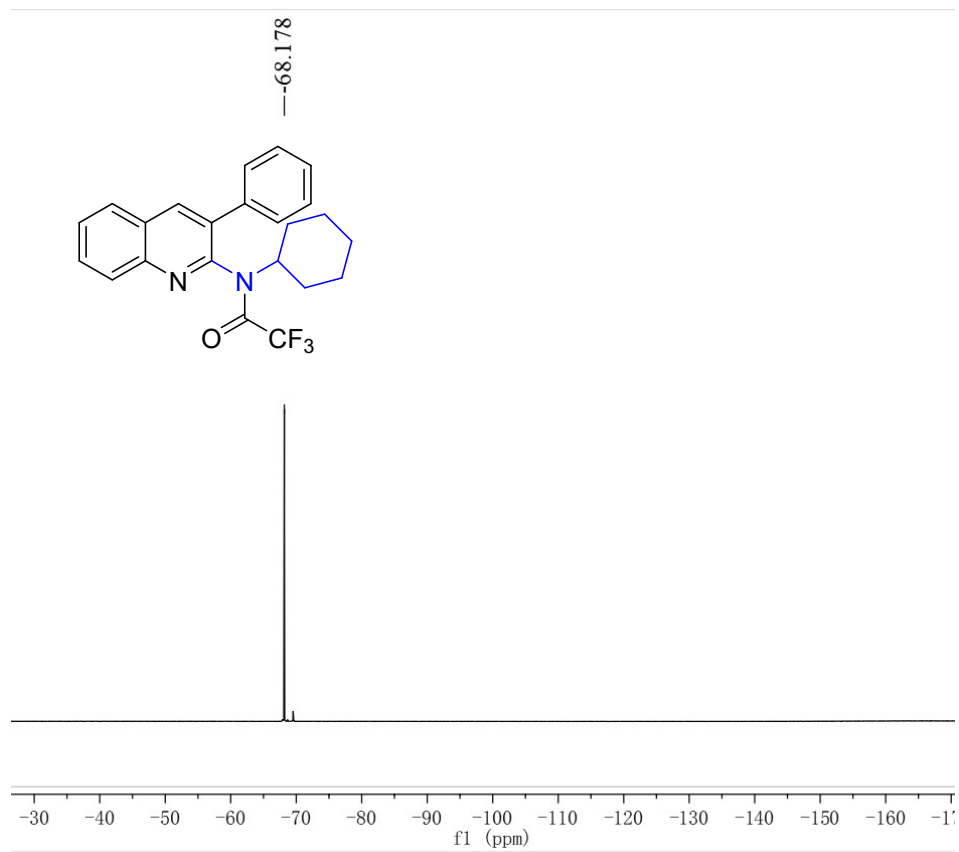

### <sup>1</sup>H NMR of 3n

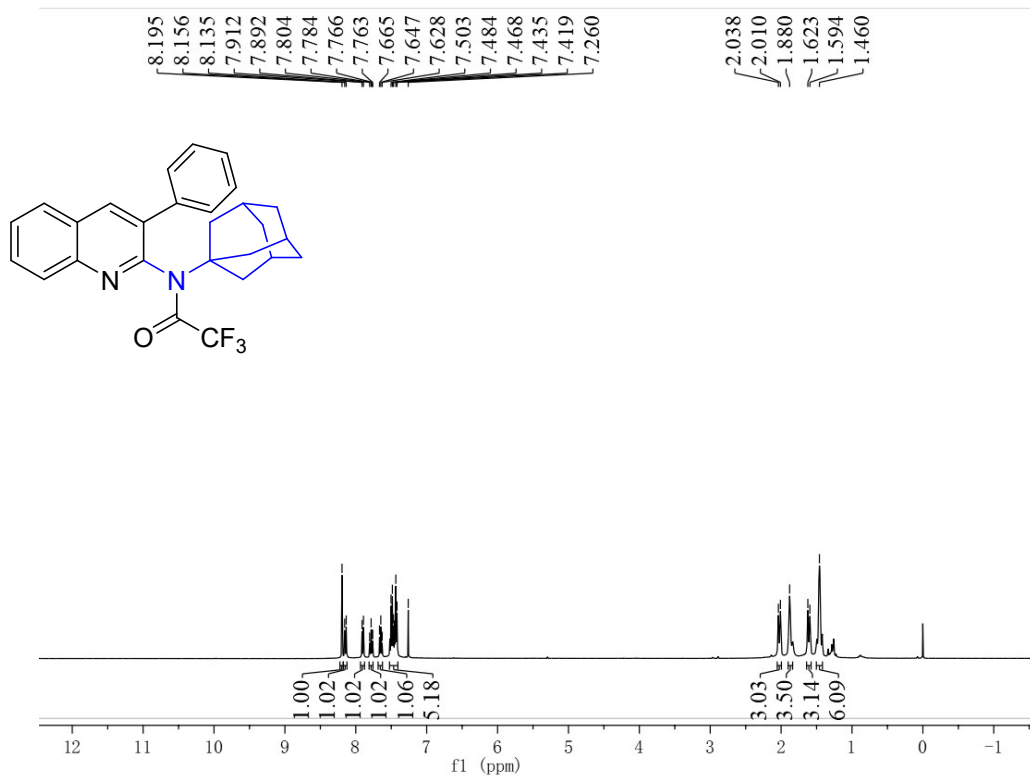

### <sup>13</sup>C NMR of 3n

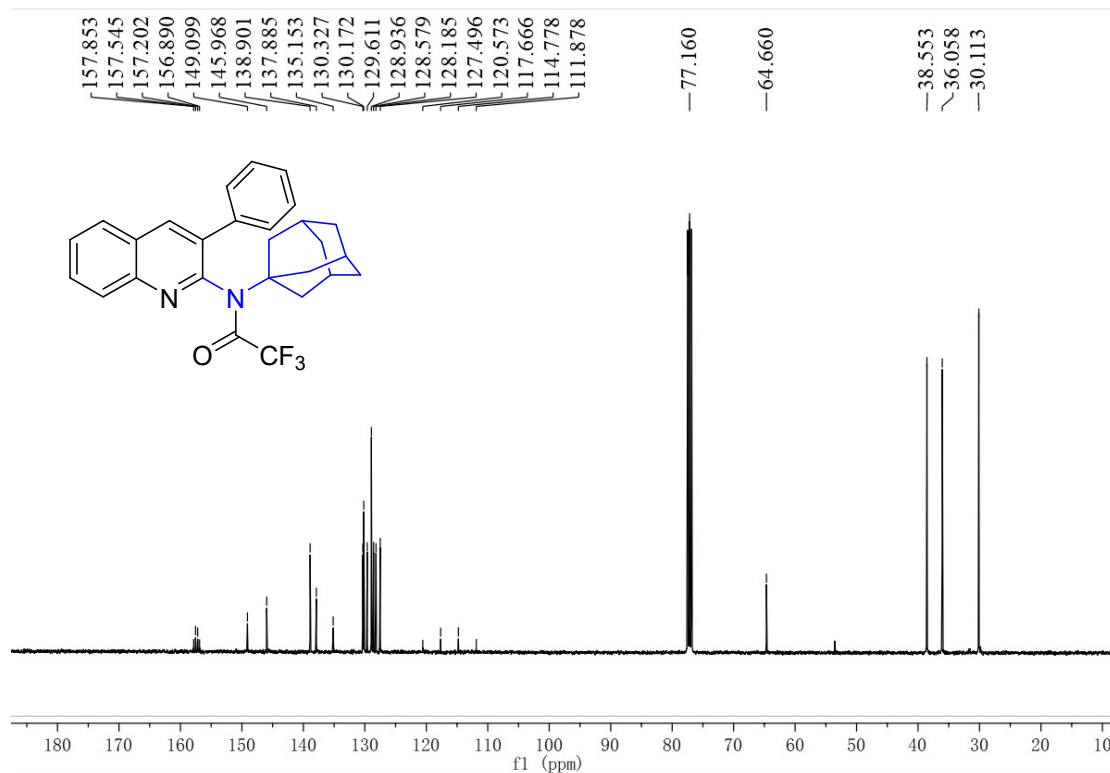



$^{19}\text{F}$  NMR of **3n**

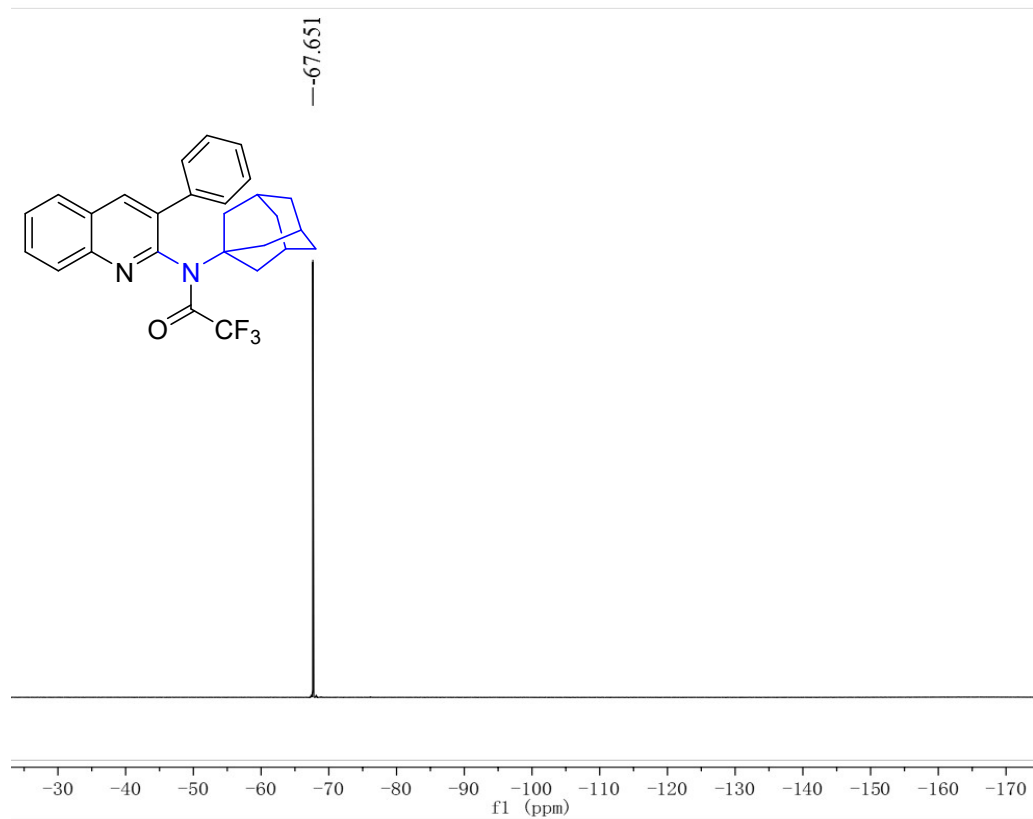

### <sup>1</sup>H NMR of **3o**

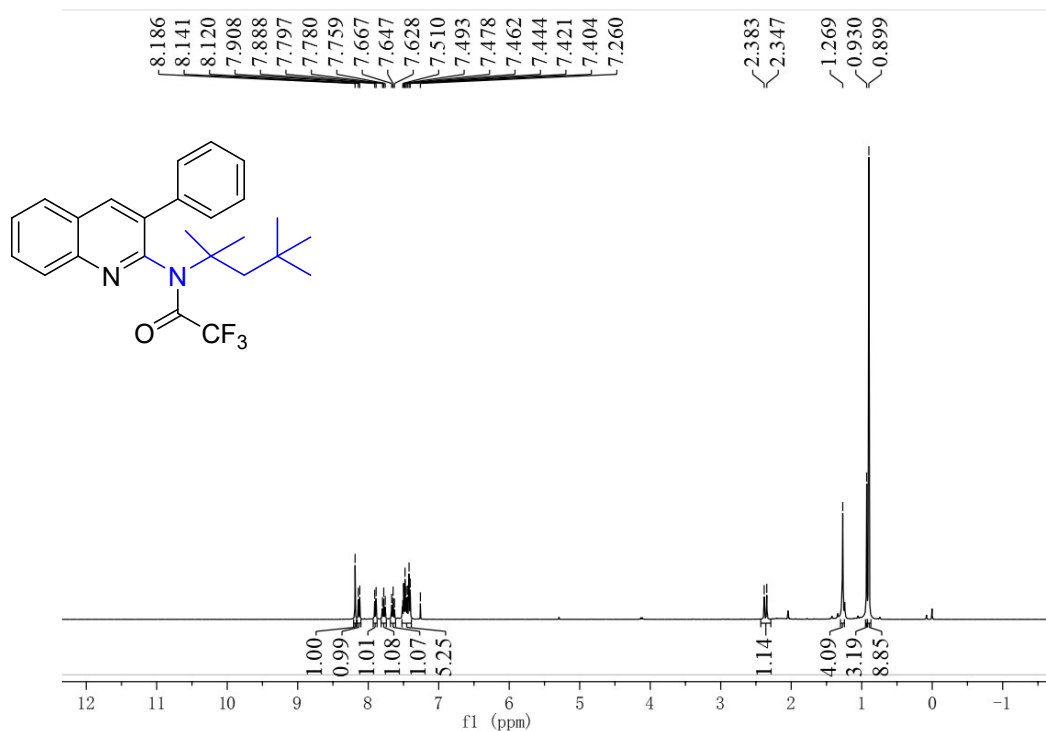

### <sup>13</sup>C NMR of **3o**

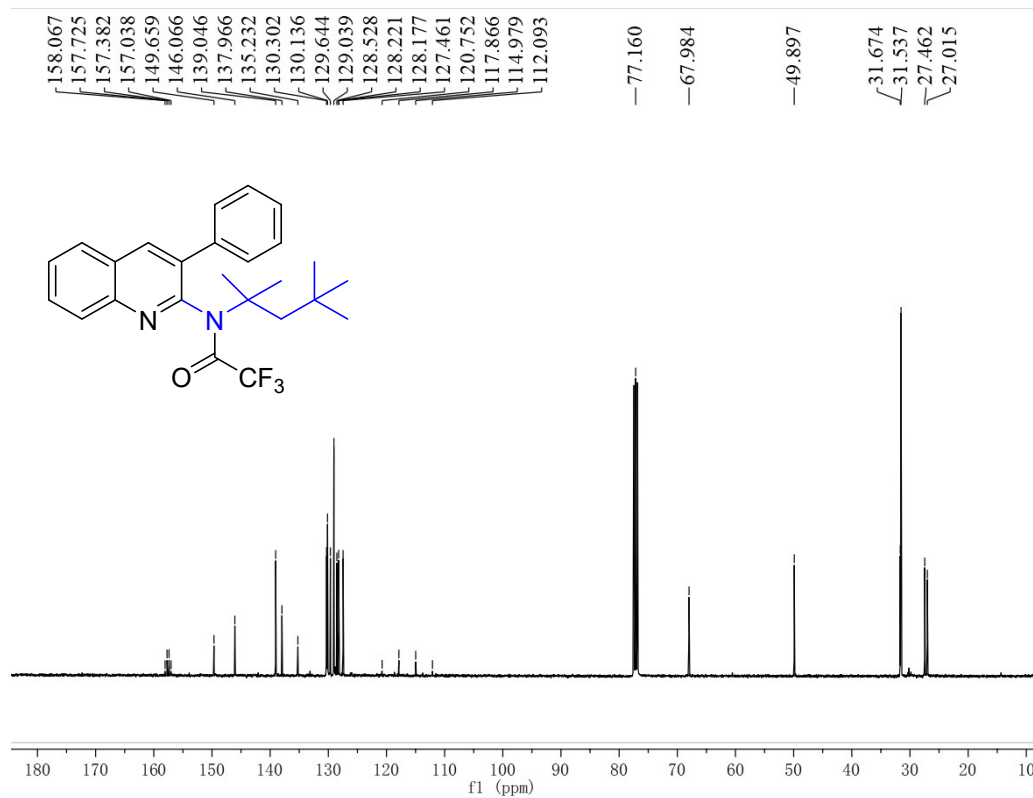

<sup>19</sup>F NMR of **3o**

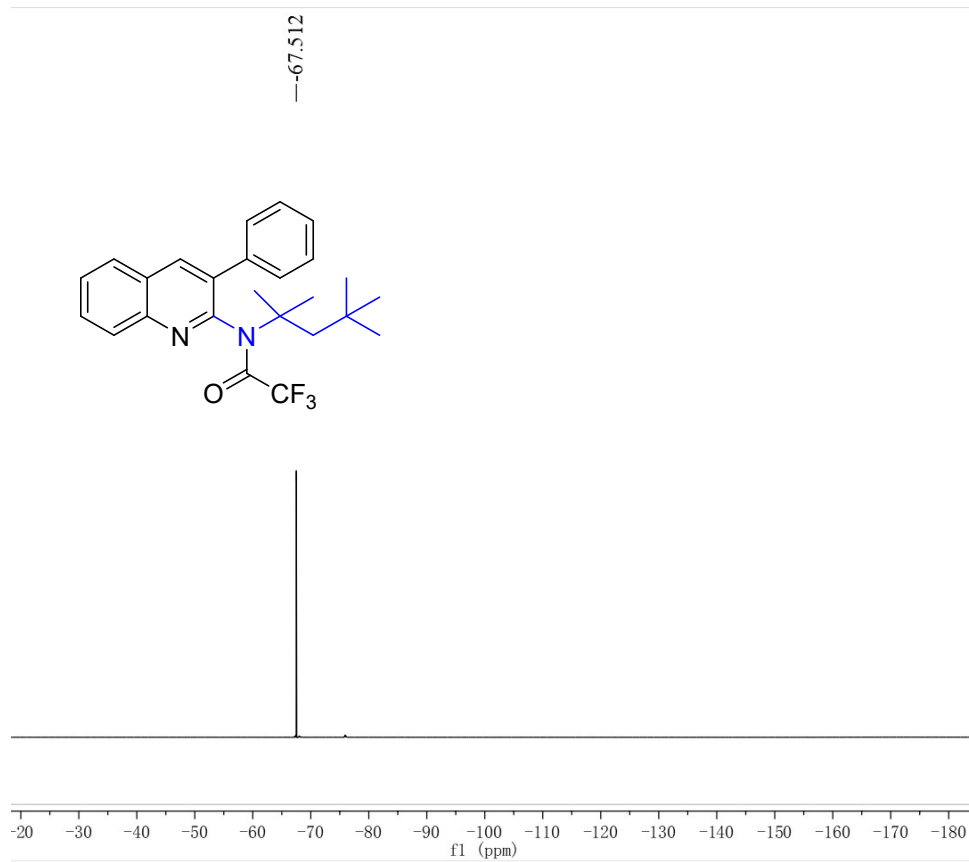

### <sup>1</sup>H NMR of 3p

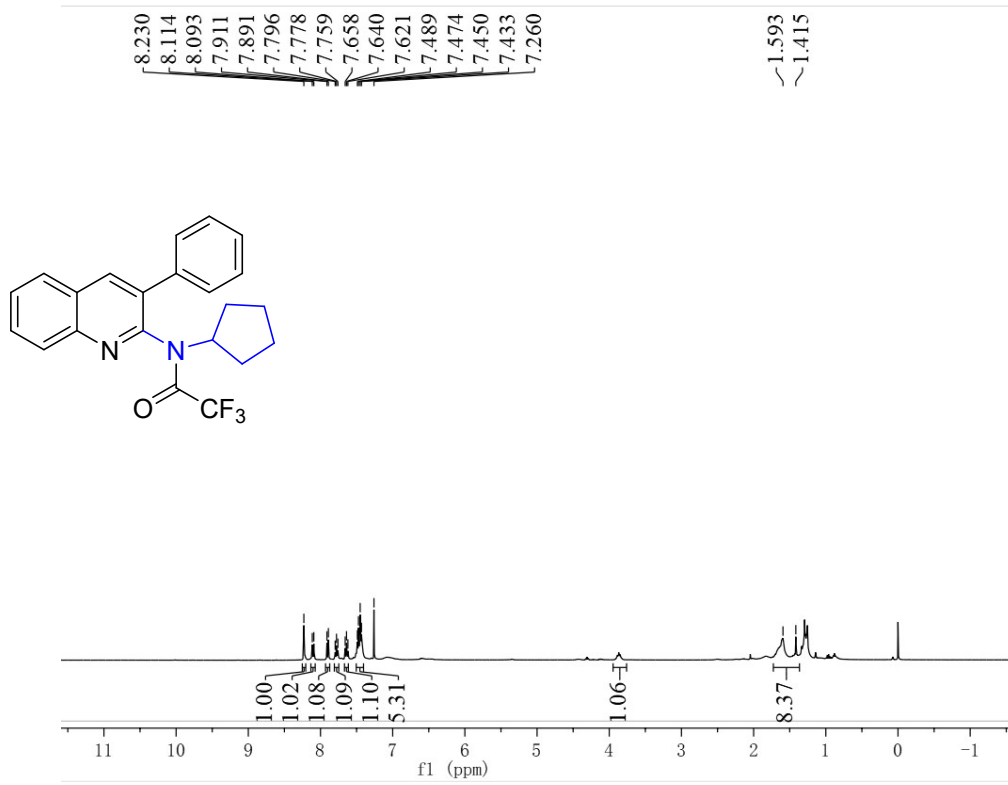

### <sup>13</sup>C NMR of 3p

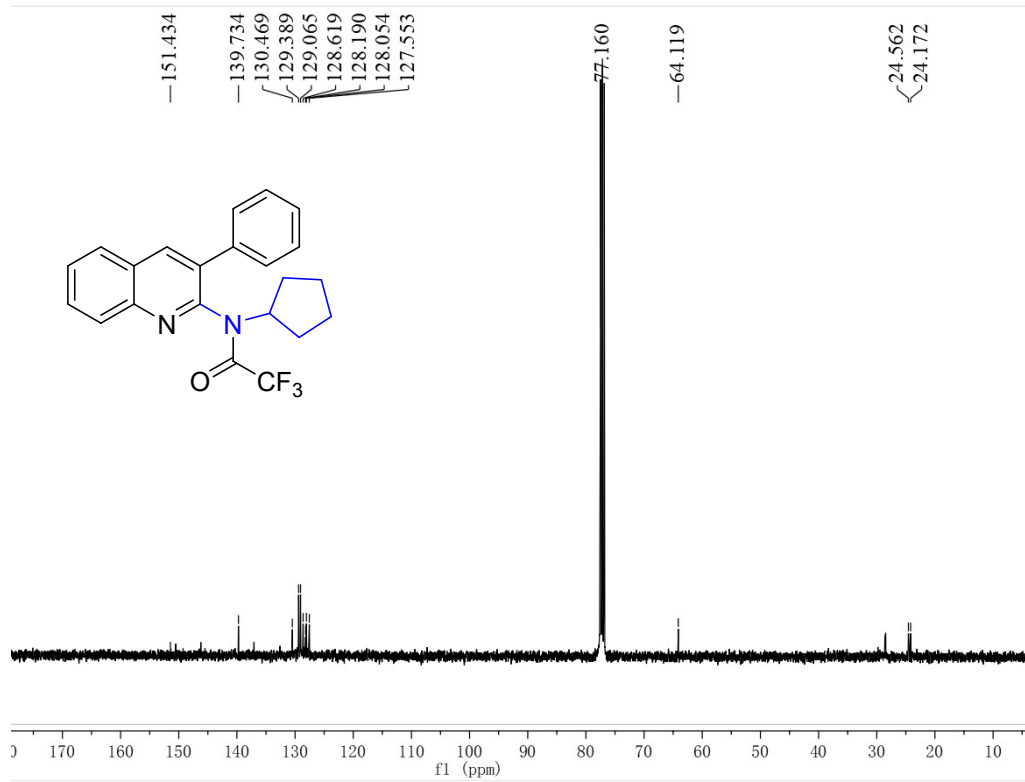

<sup>19</sup>F NMR of **3p**

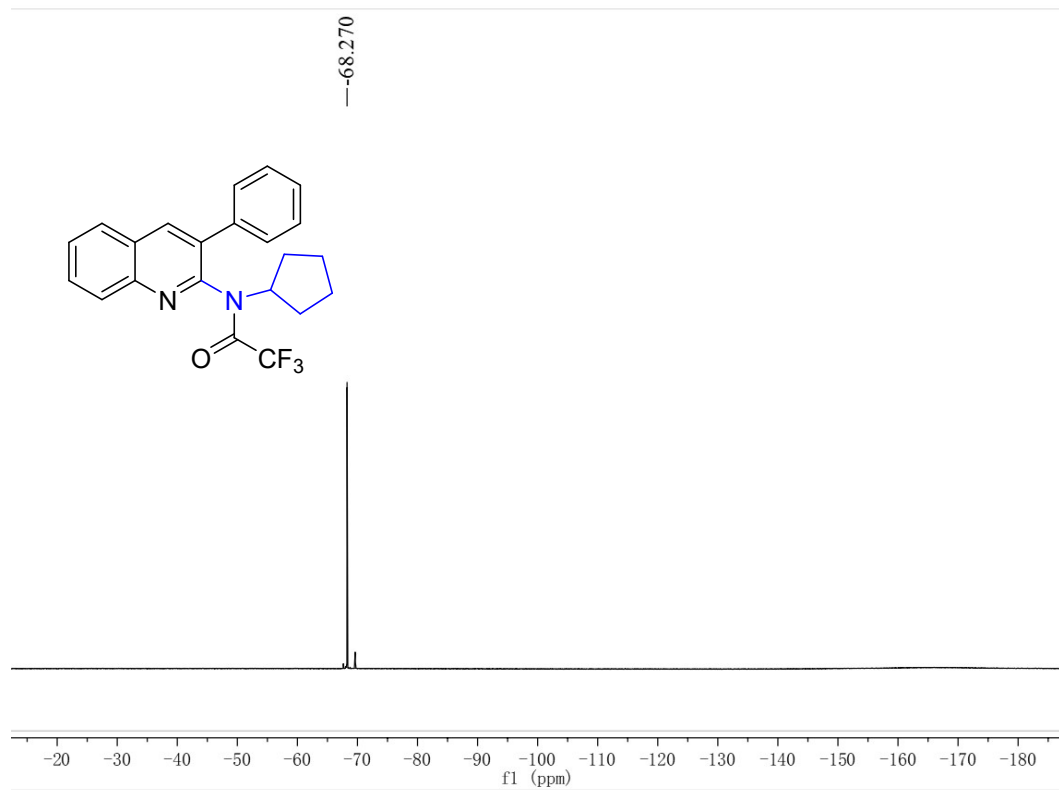



### $^1\text{H}$ NMR of **4a**

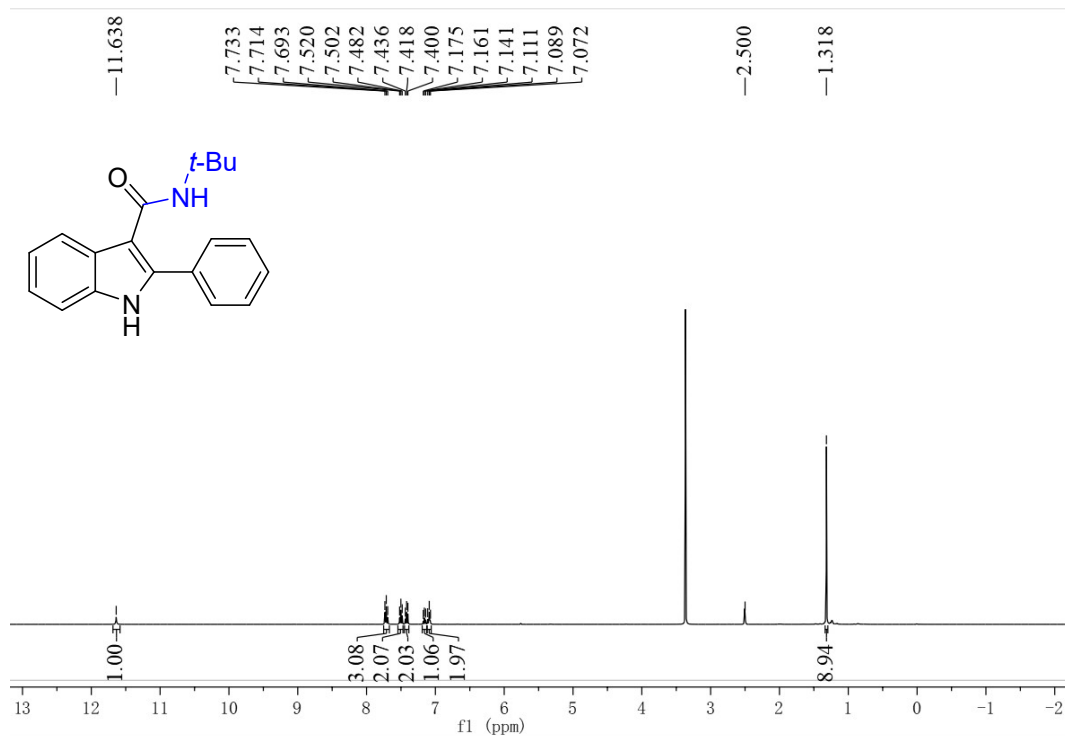

### $^{13}\text{C}$ NMR of **4a**

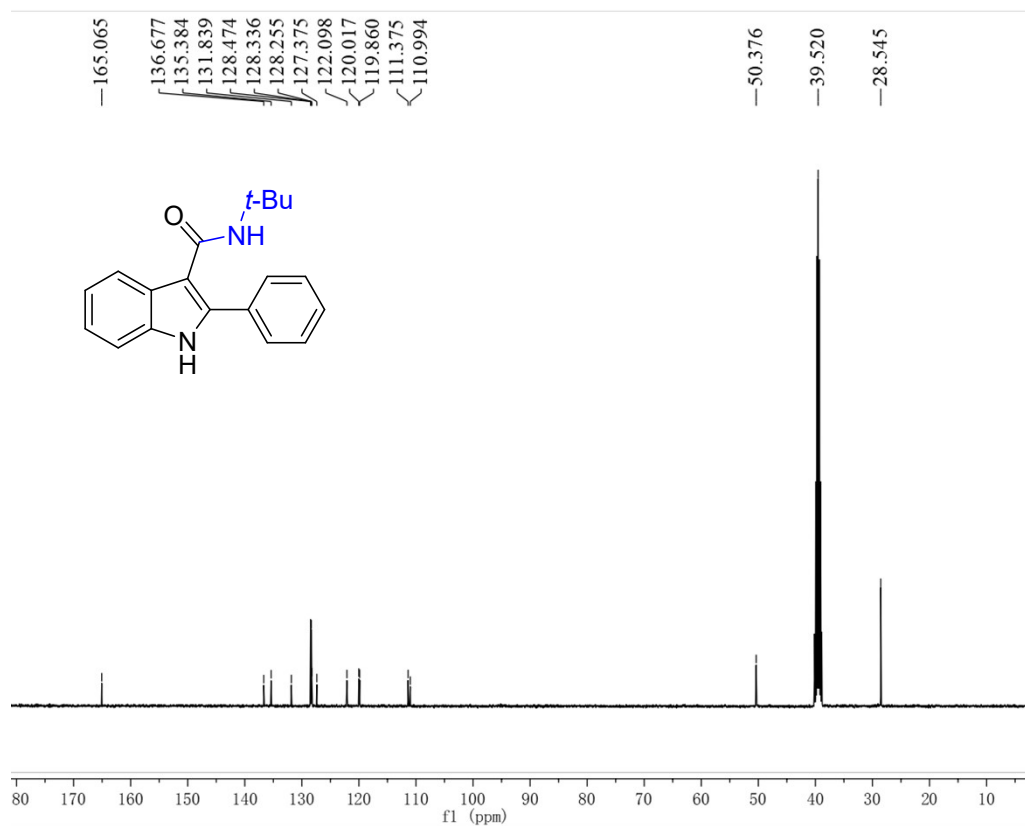

### $^1\text{H}$ NMR of **4b**

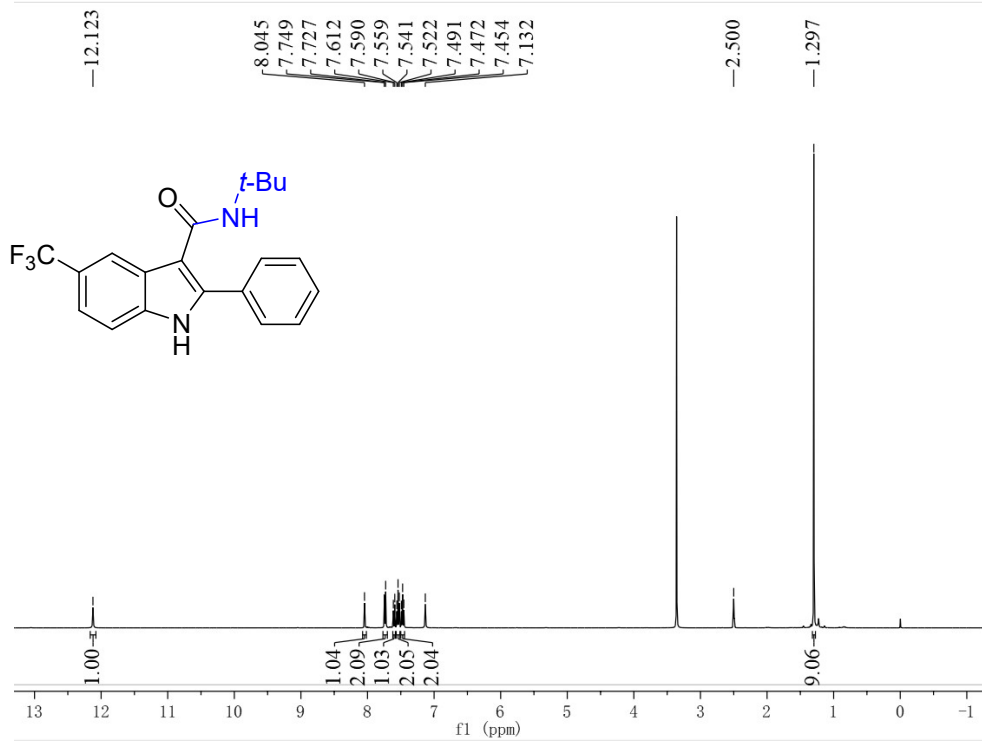

### $^{13}\text{C}$ NMR of **4b**

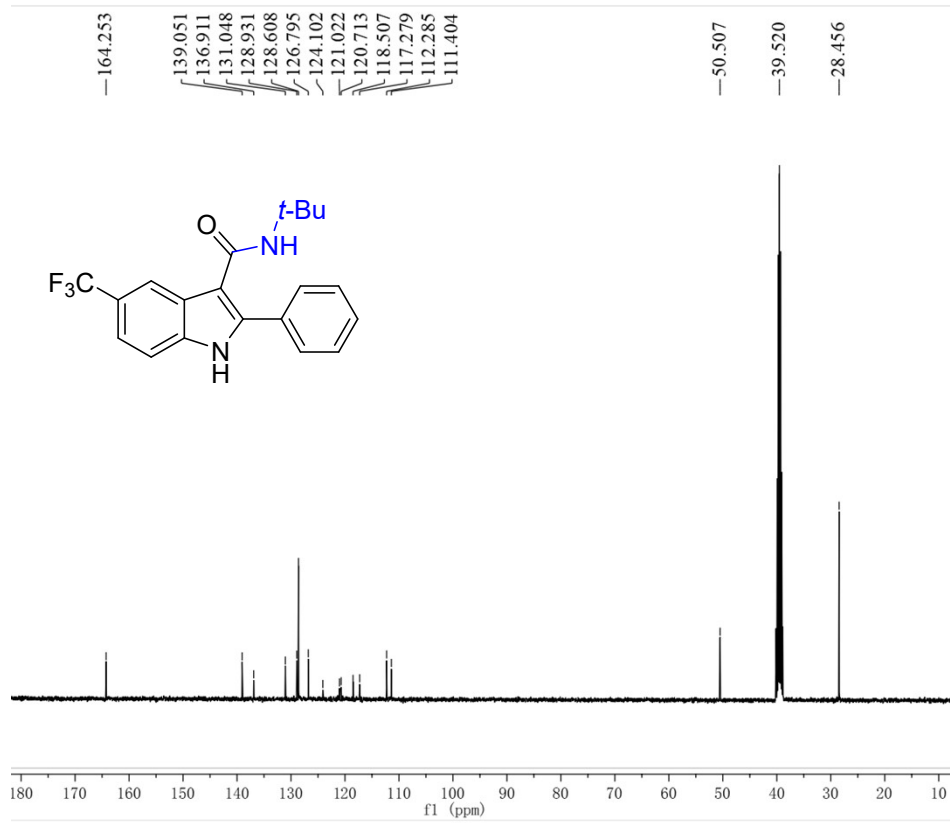

### $^1\text{H}$ NMR of **4c**

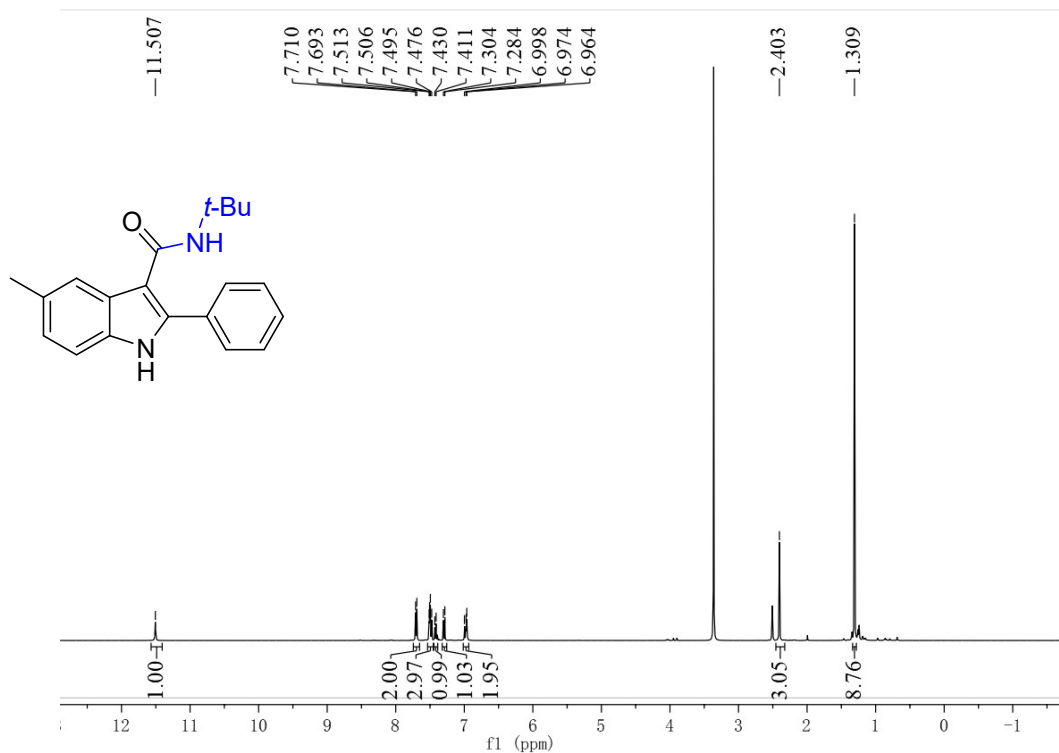

### $^{13}\text{C}$ NMR of **4c**

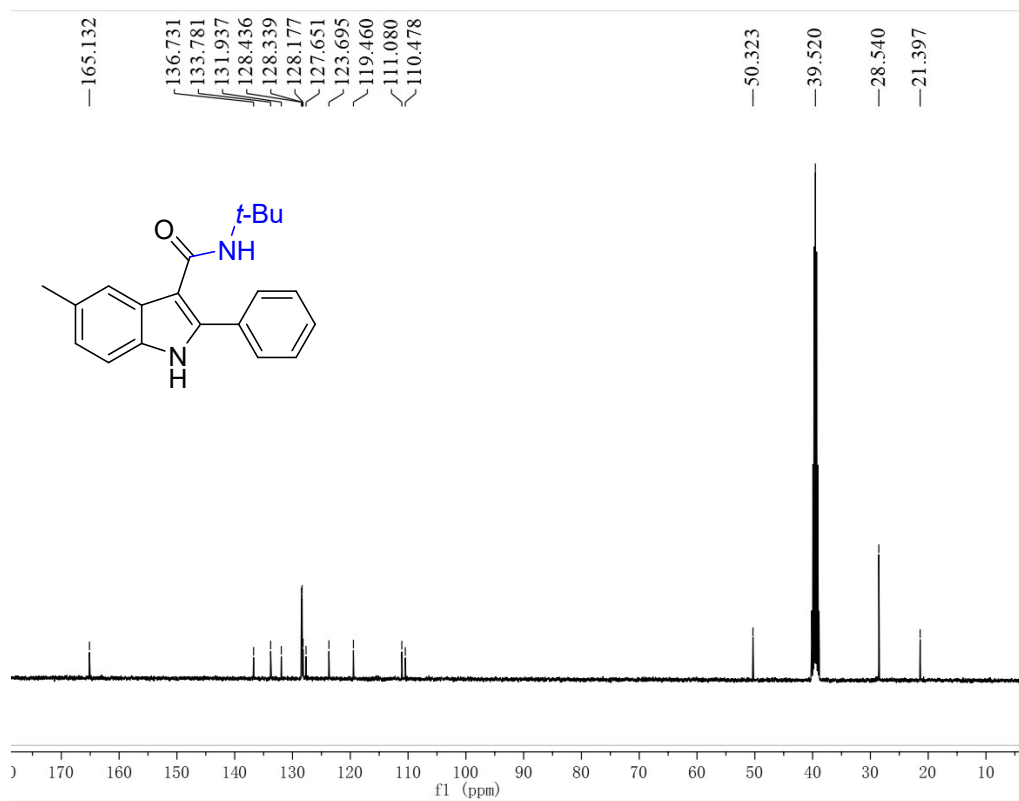

### <sup>1</sup>H NMR of 4d

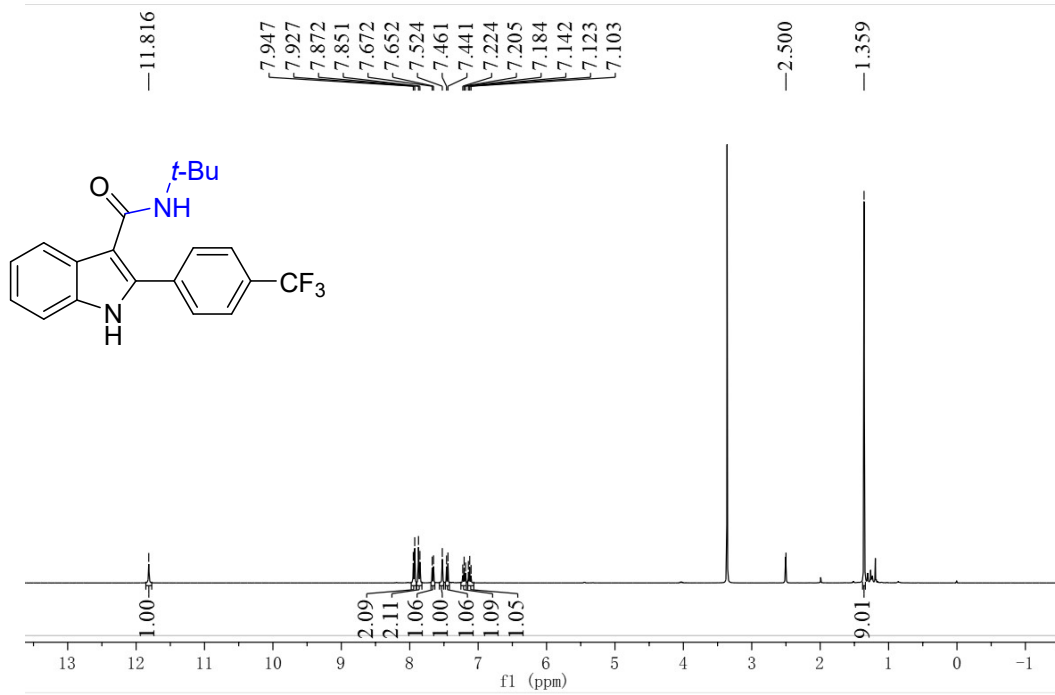

### <sup>13</sup>C NMR of 4d

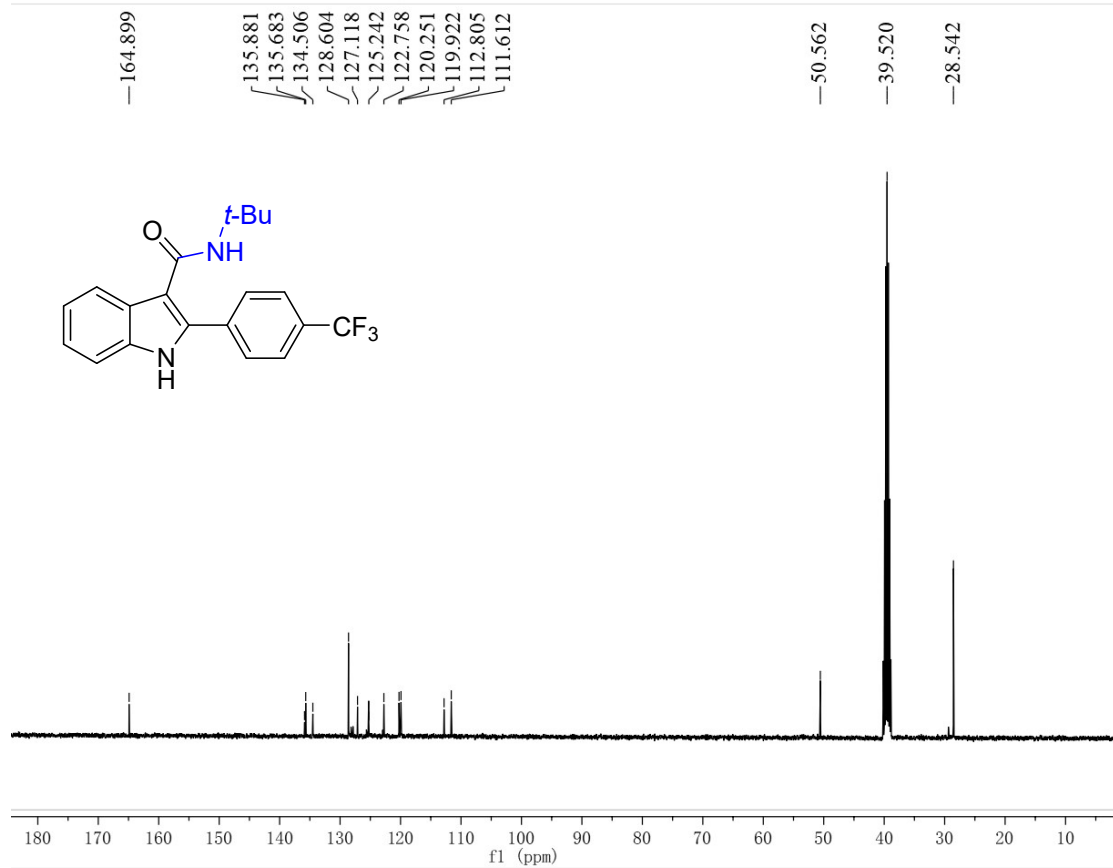



### <sup>1</sup>H NMR of 4e

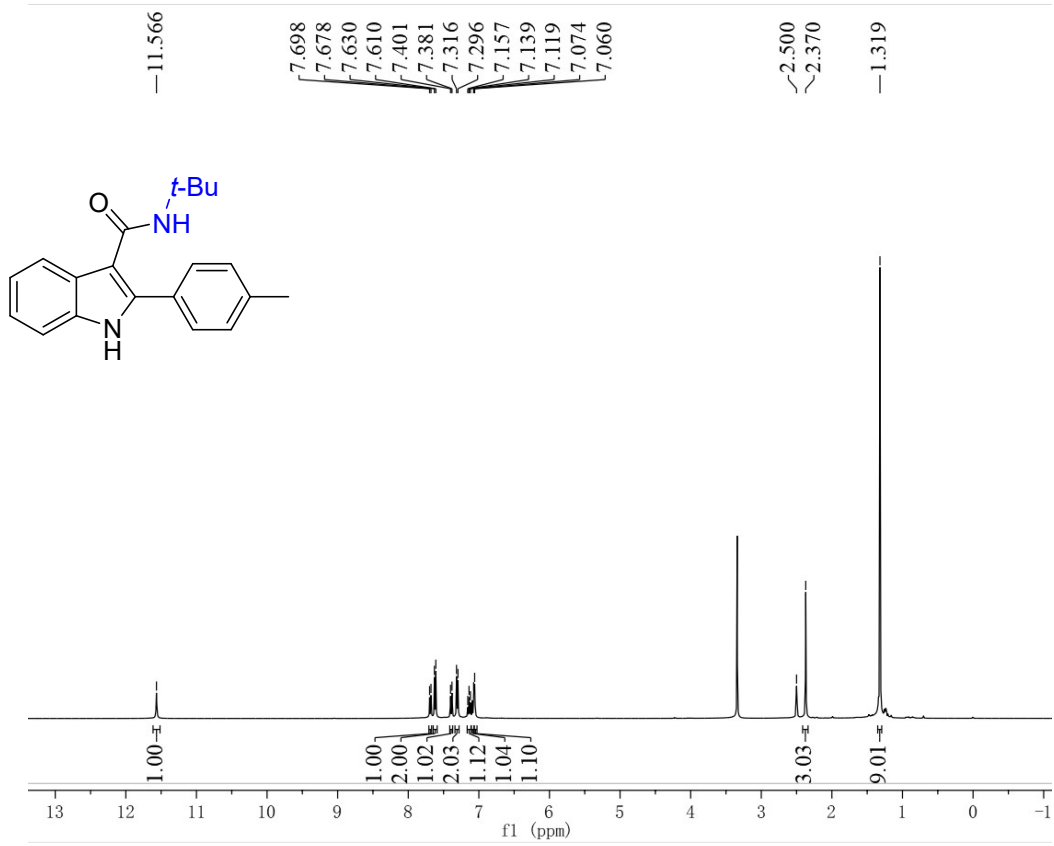

### <sup>13</sup>C NMR of 4e

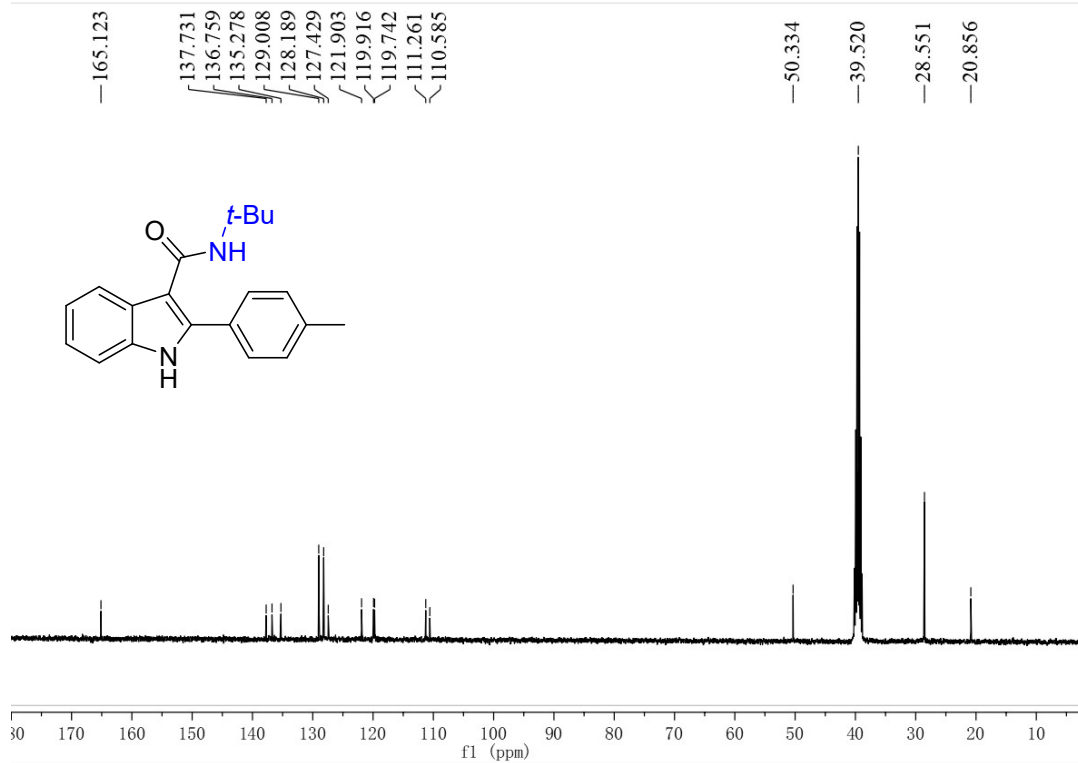

### $^1\text{H}$ NMR of **4f**

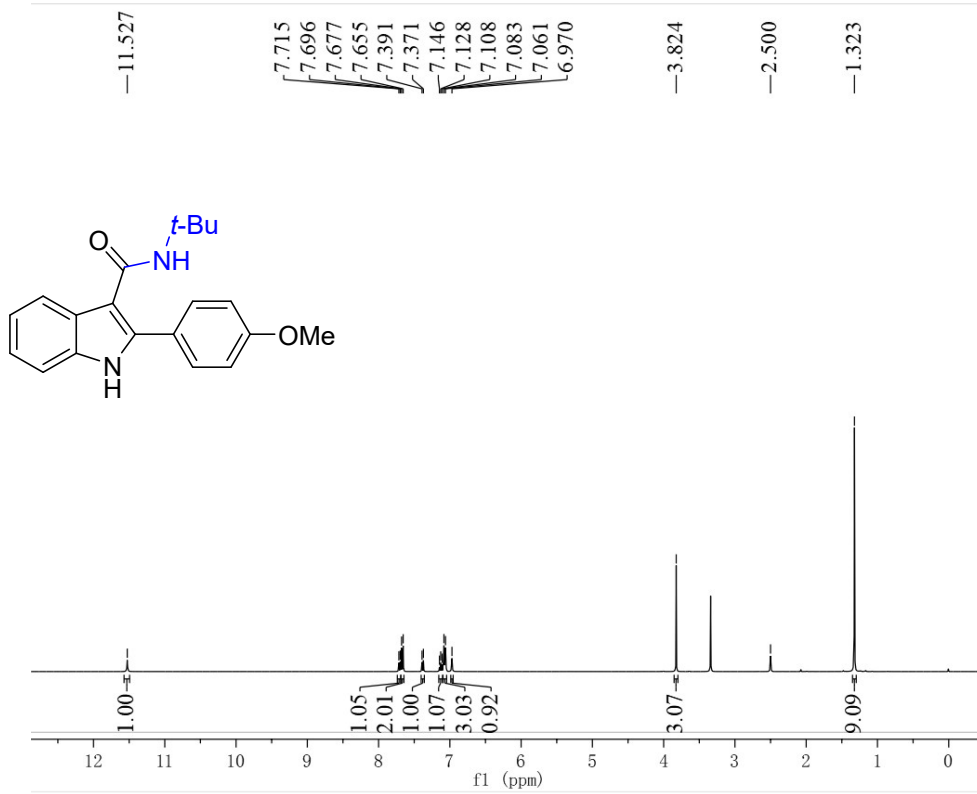

### $^{13}\text{C}$ NMR of **4f**

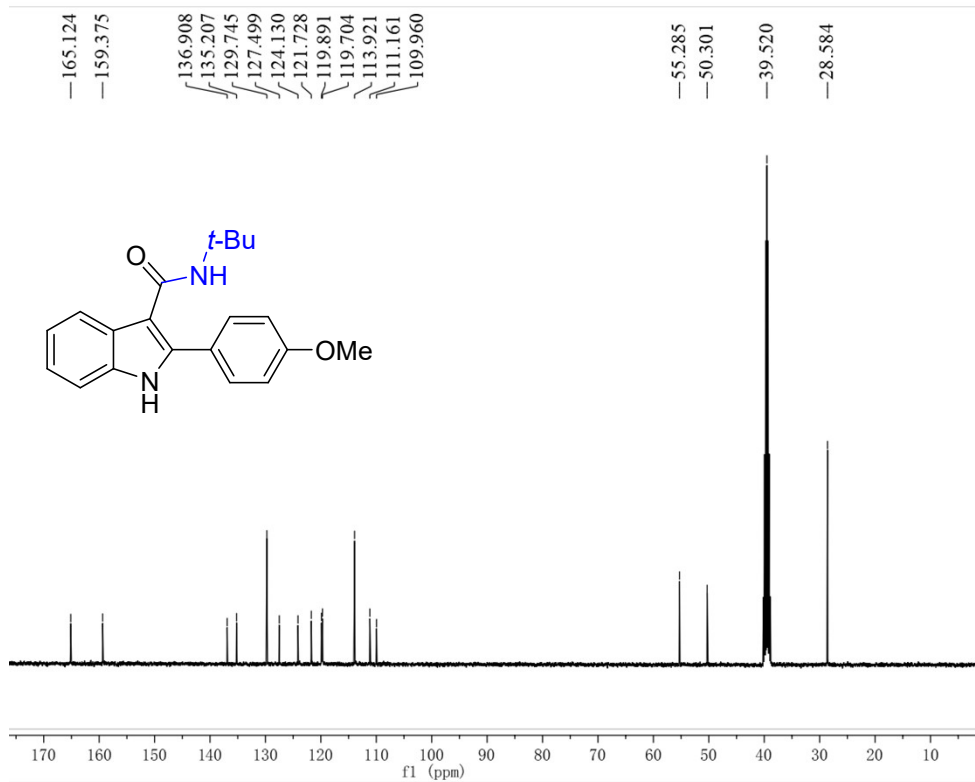

### <sup>1</sup>H NMR of 4g

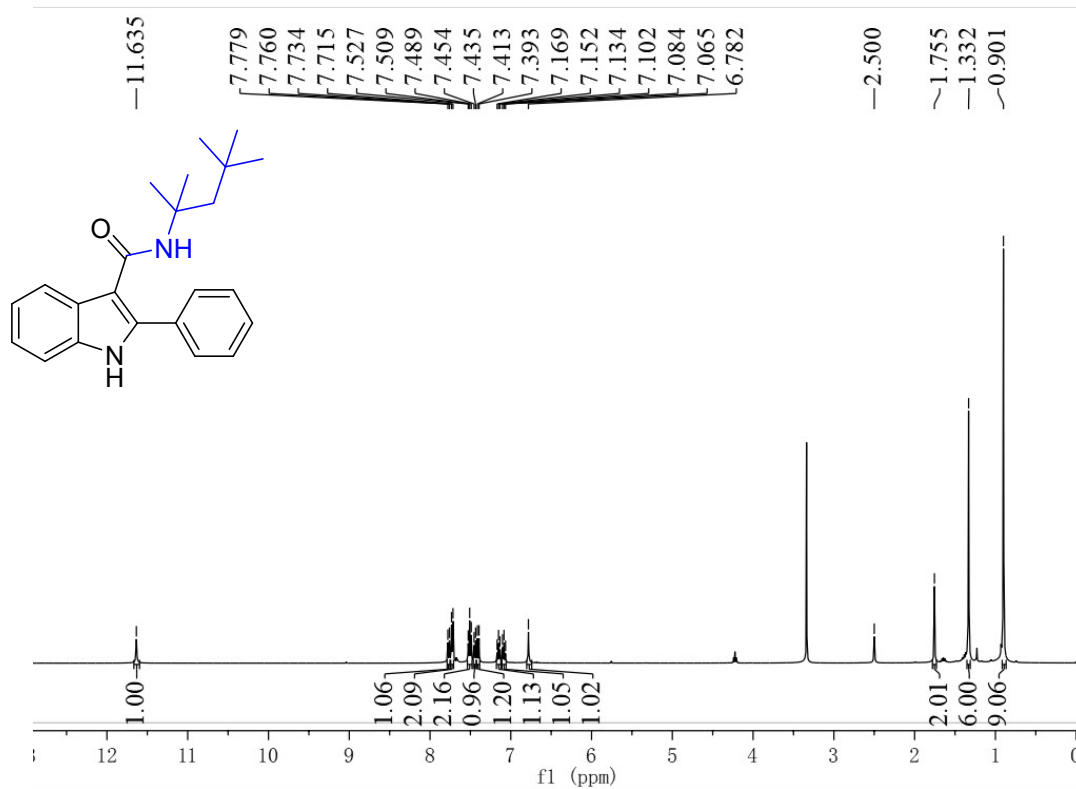

### <sup>13</sup>C NMR of 4g

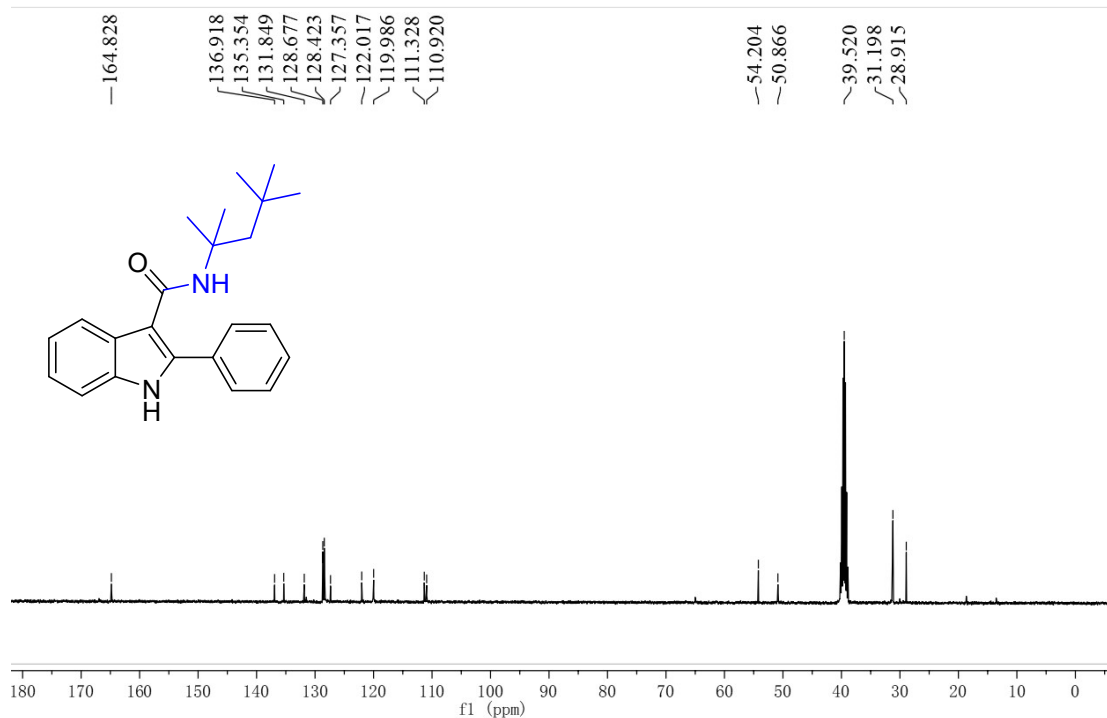

Supplement: d2gc02147a1.pdf [file d2gc02147a1.pdf]
